# Supplementary material for: Regioselective multicomponent sequential synthesis of hydantoins
Source: Royal Society of Chemistry journal article supplement (doi:10.1039/c2ob26498f), 2012-01-01

## Supporting Information

# Regioselective Multicomponent Sequential Synthesis of Hydantoins

Francesca Olimpieri,<sup>a</sup> Maria Cristina Bellucci,<sup>b</sup> Tommaso Marcelli,<sup>a</sup> and Alessandro Volonterio\*<sup>a</sup>

<sup>a</sup>*Department of Chemistry, Materials and Chemical Engineering “Giulio Natta”, Politecnico di Milano, via Mancinelli 7, 20131 Milano, Italy.* <sup>b</sup>*Dipartimento di Chimica Agroalimentare, Università degli Studi di Milano, via Celoria 2, 20133 Milano, Italy*

[alessandro.volonterio@polimi.it](mailto:alessandro.volonterio@polimi.it)

### Table of Contents:

|         |                                                                                                           |
|---------|-----------------------------------------------------------------------------------------------------------|
| S1-S42  | <sup>1</sup> H NMR and <sup>13</sup> C NMR spectra of hydantoins <b>3</b> .                               |
| S43-S51 | NMR and <sup>13</sup> C NMR spectra of <i>N</i> -acylurea derivatives <b>6</b>                            |
| S52-S53 | <sup>1</sup> H NMR and <sup>13</sup> C NMR spectra of <i>N</i> -monosubstituted hydantoins <b>14,15</b> . |

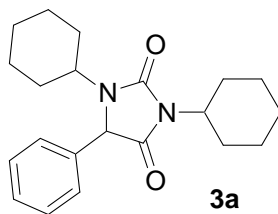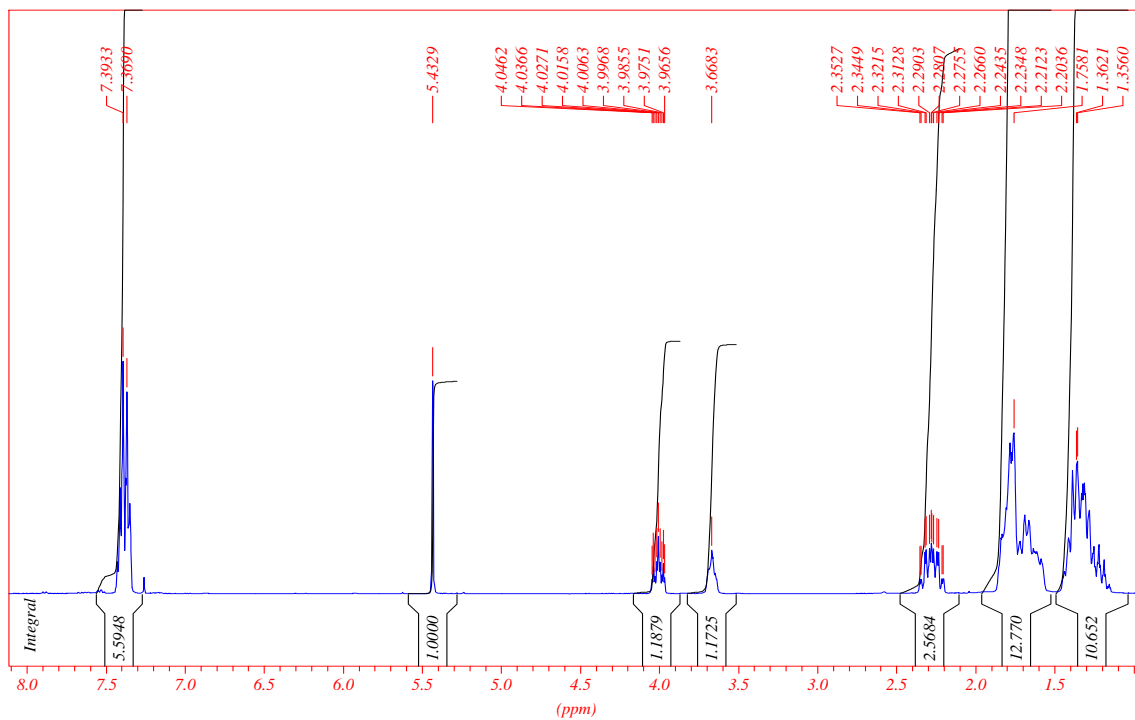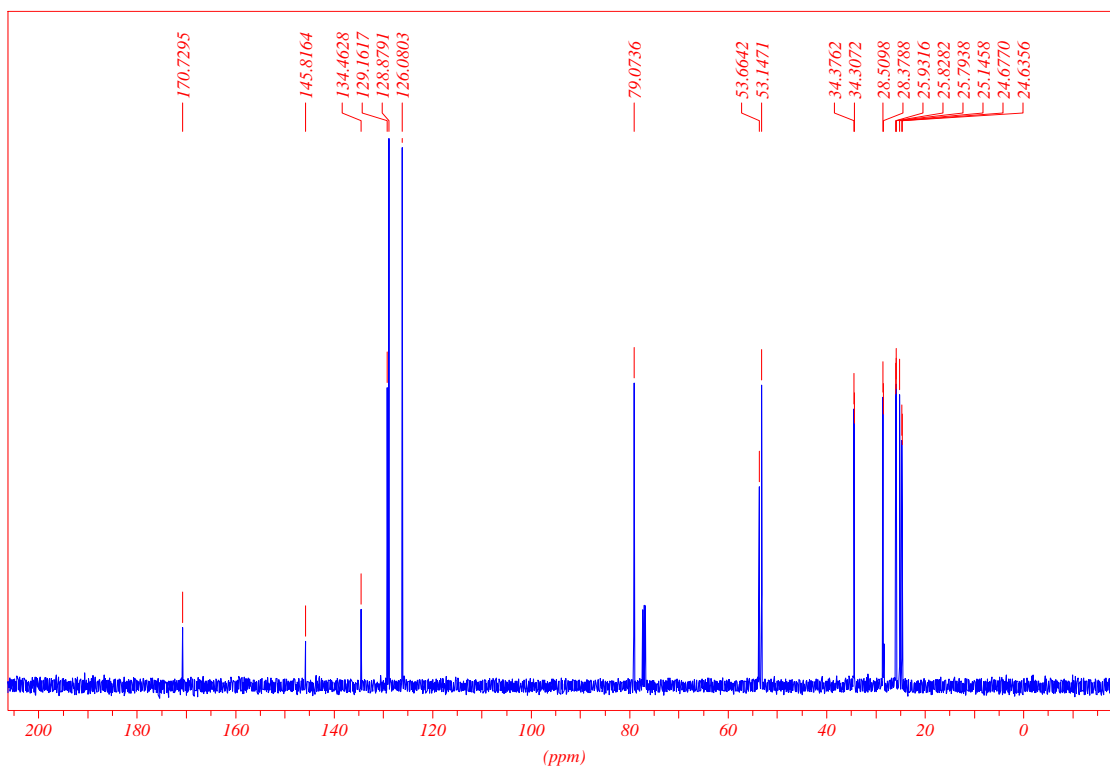

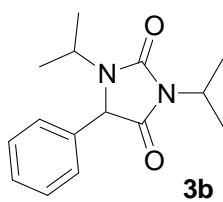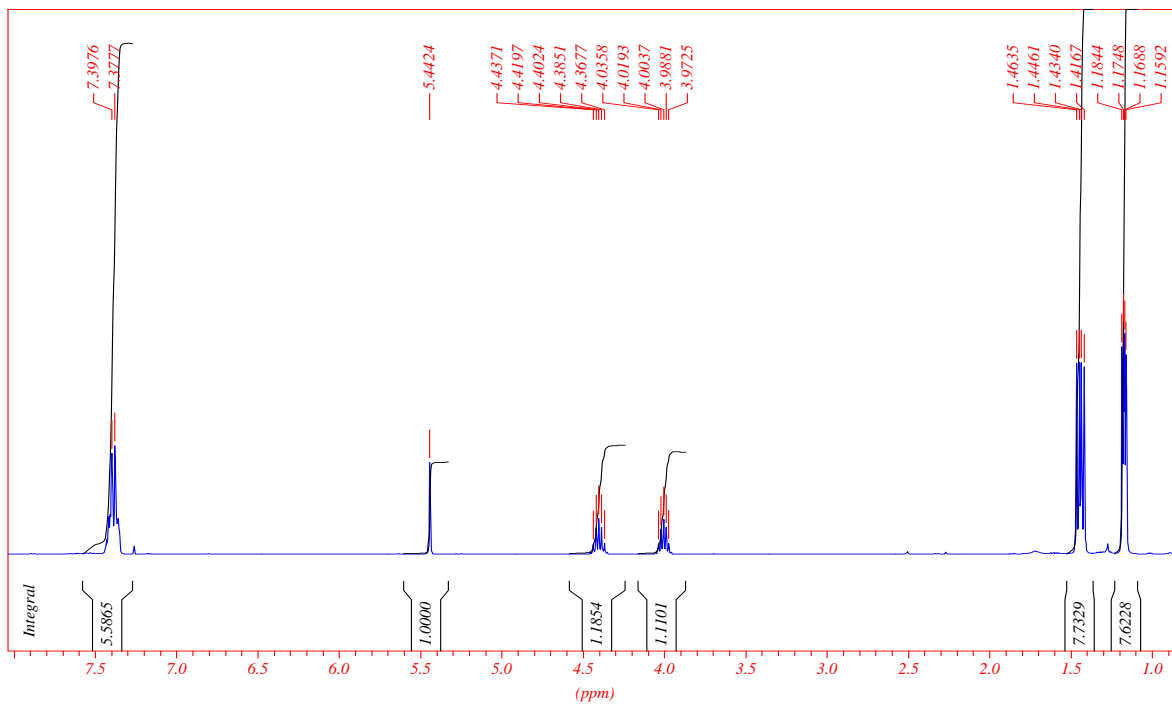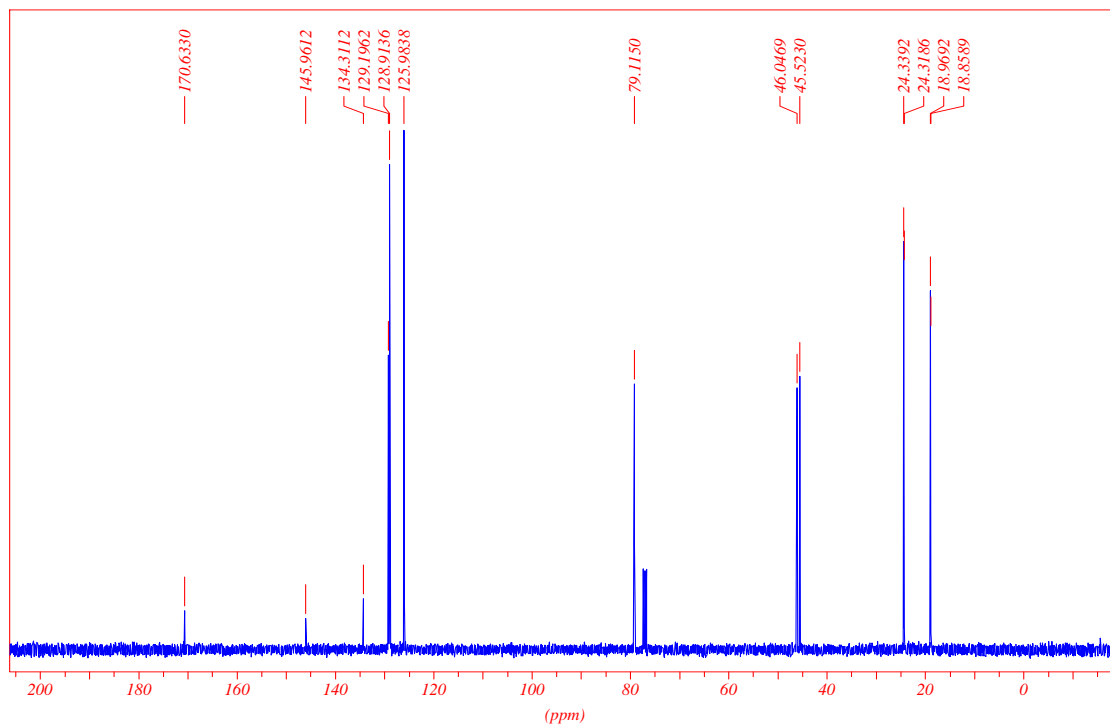

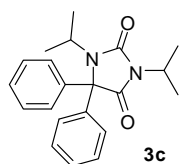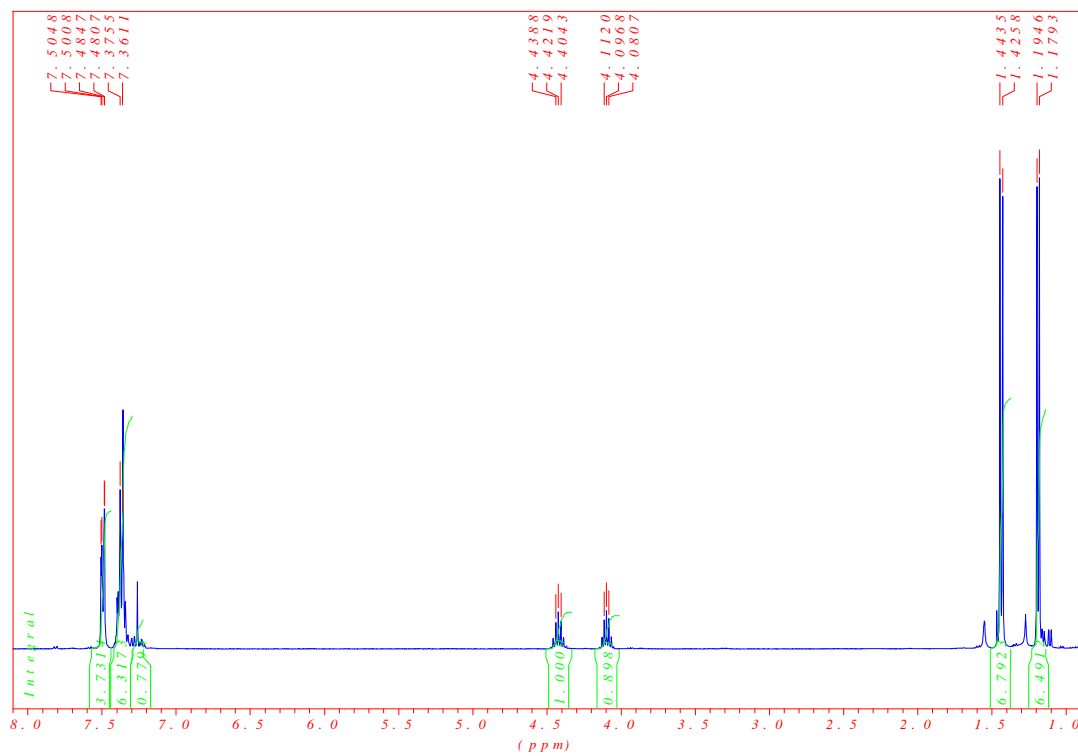

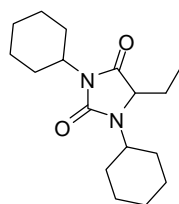

**3d**

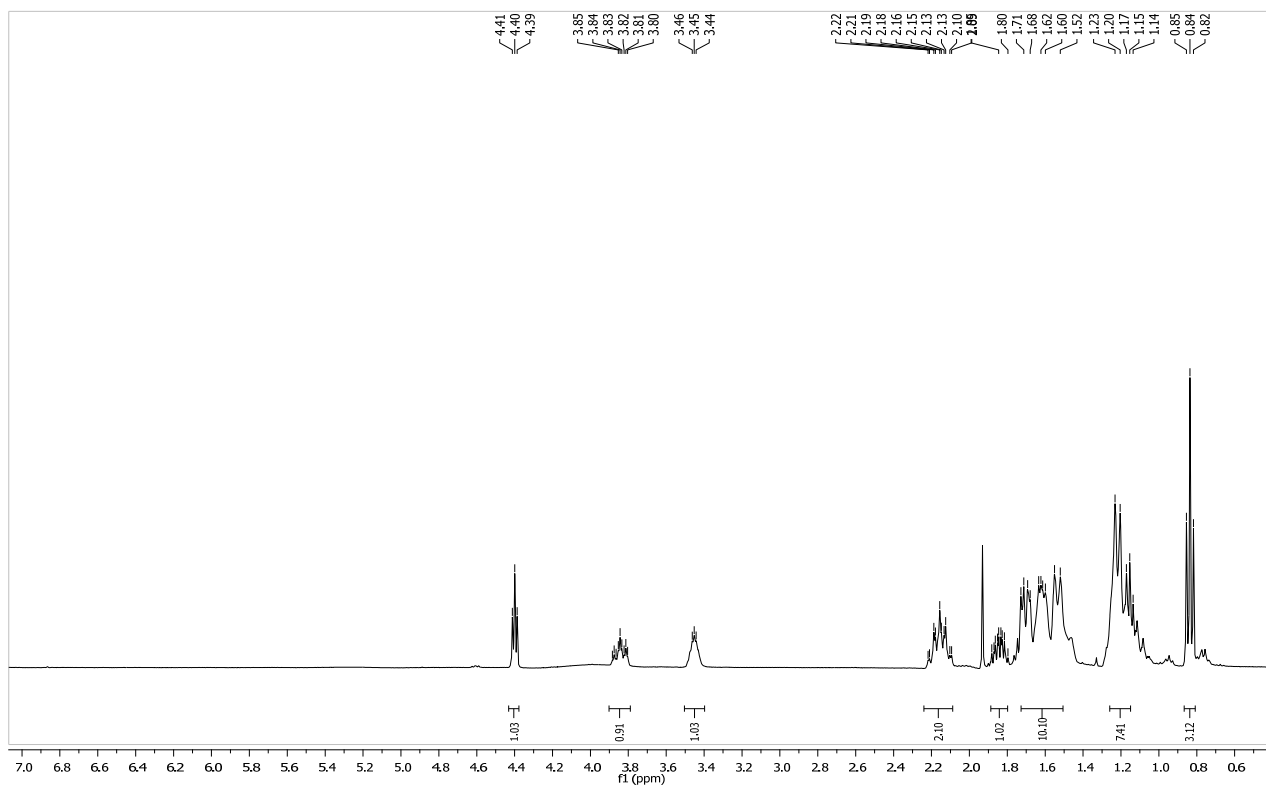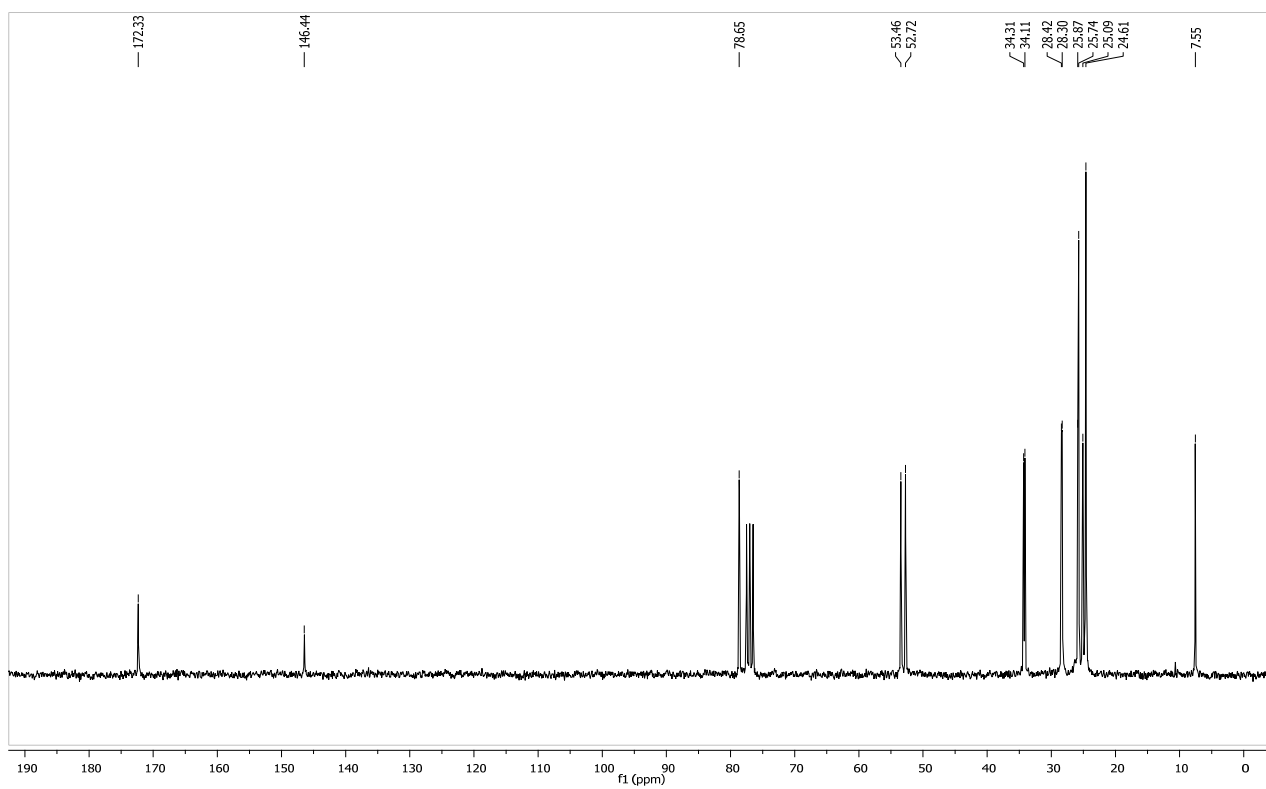

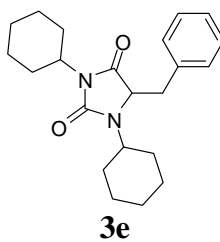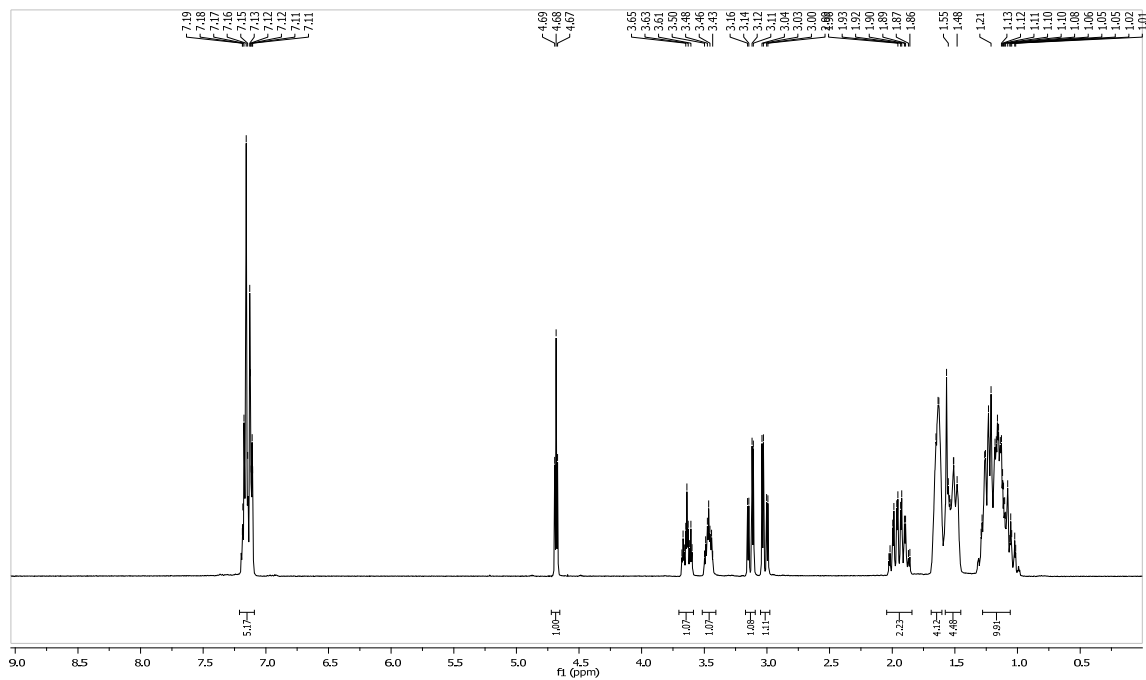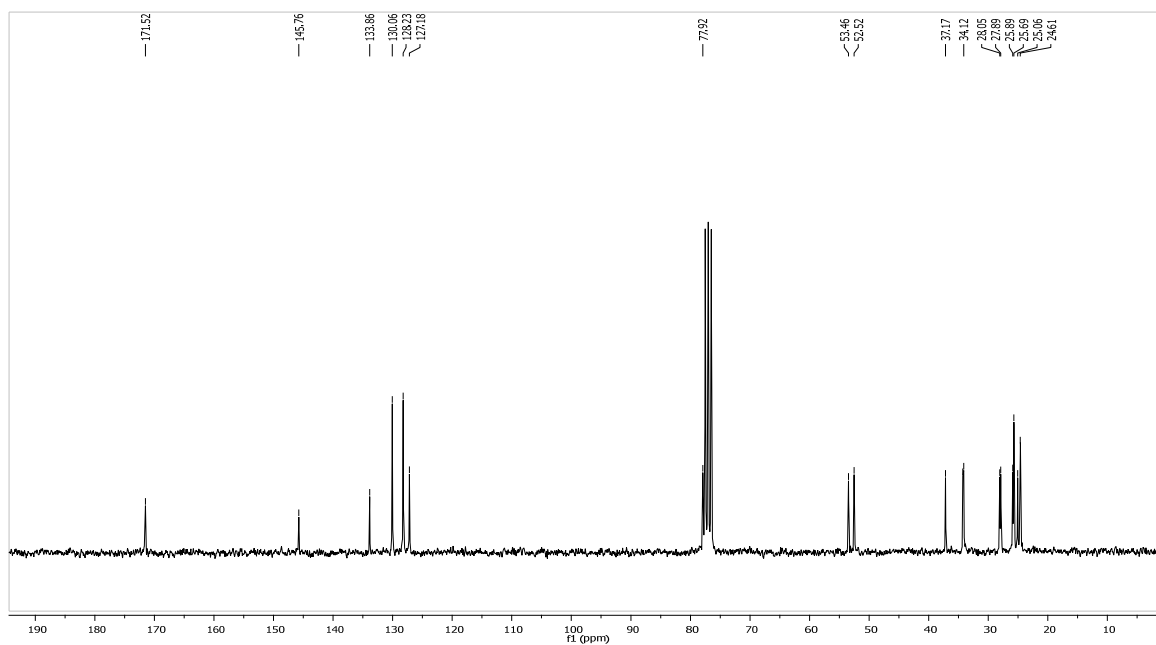

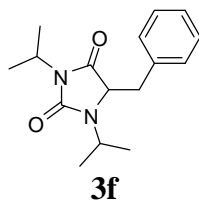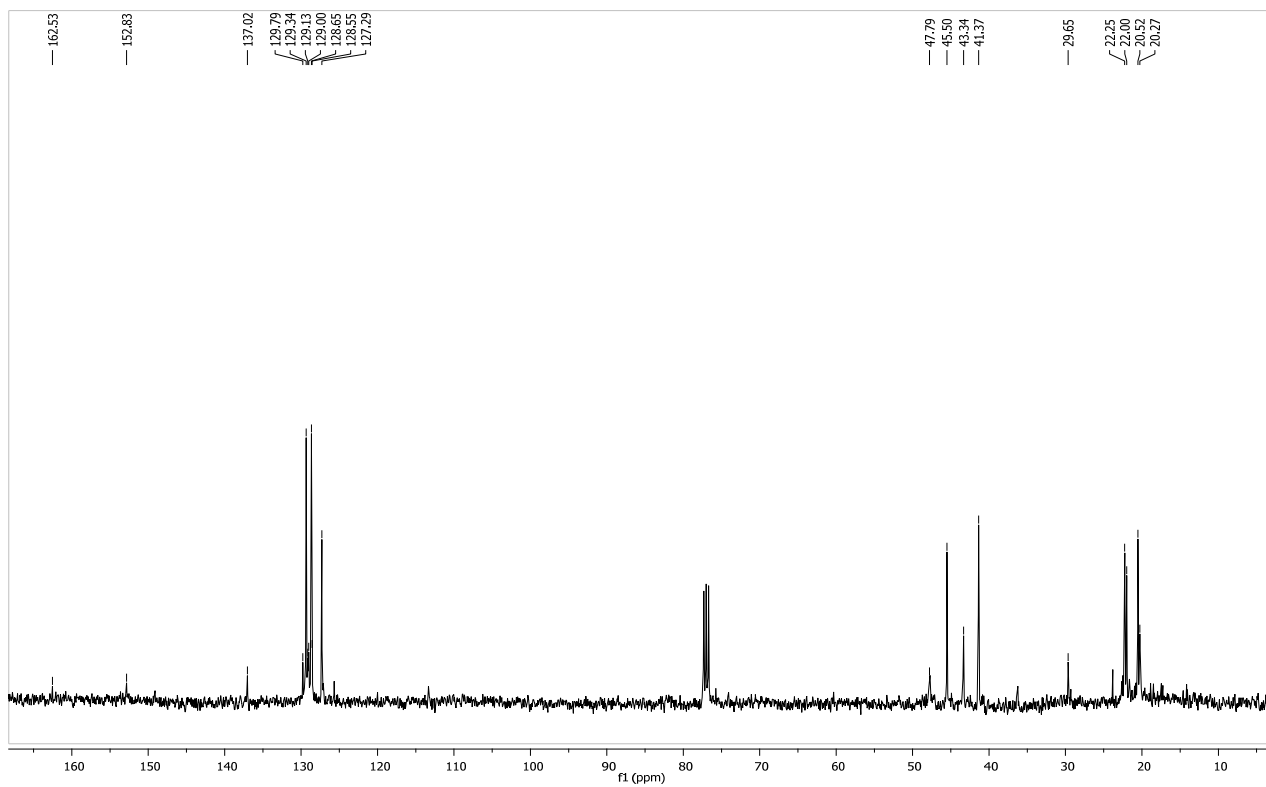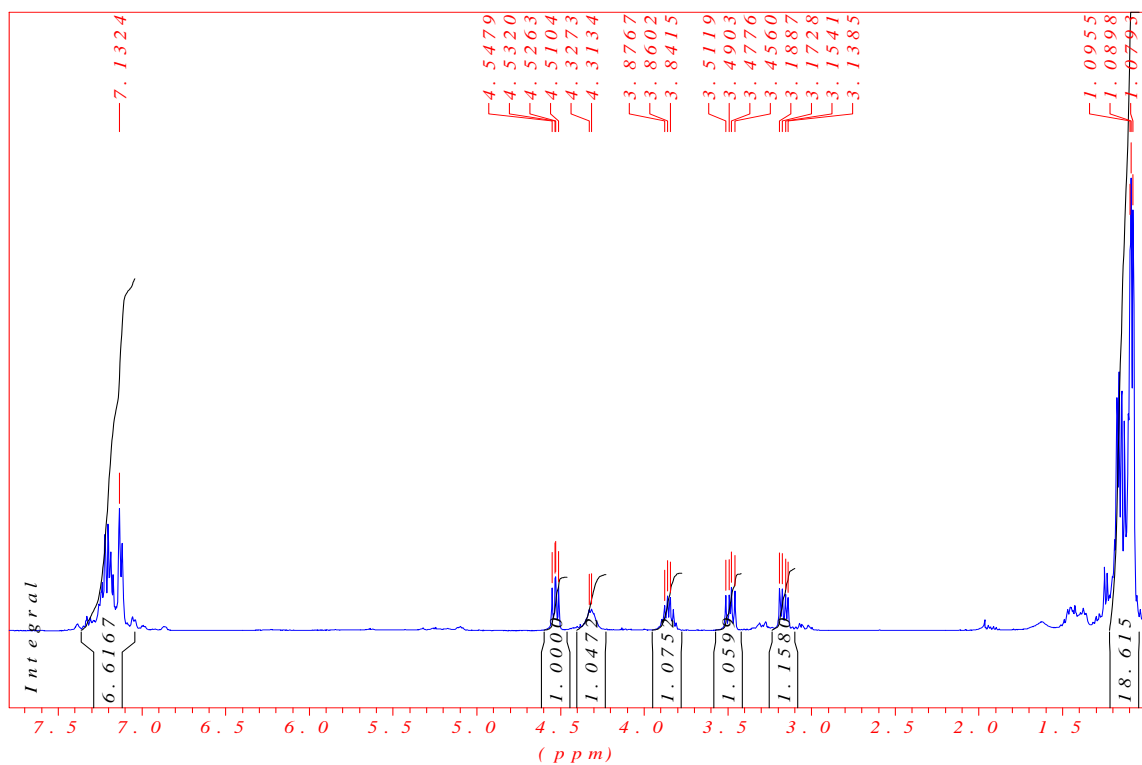

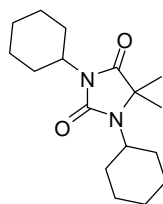

**3g**

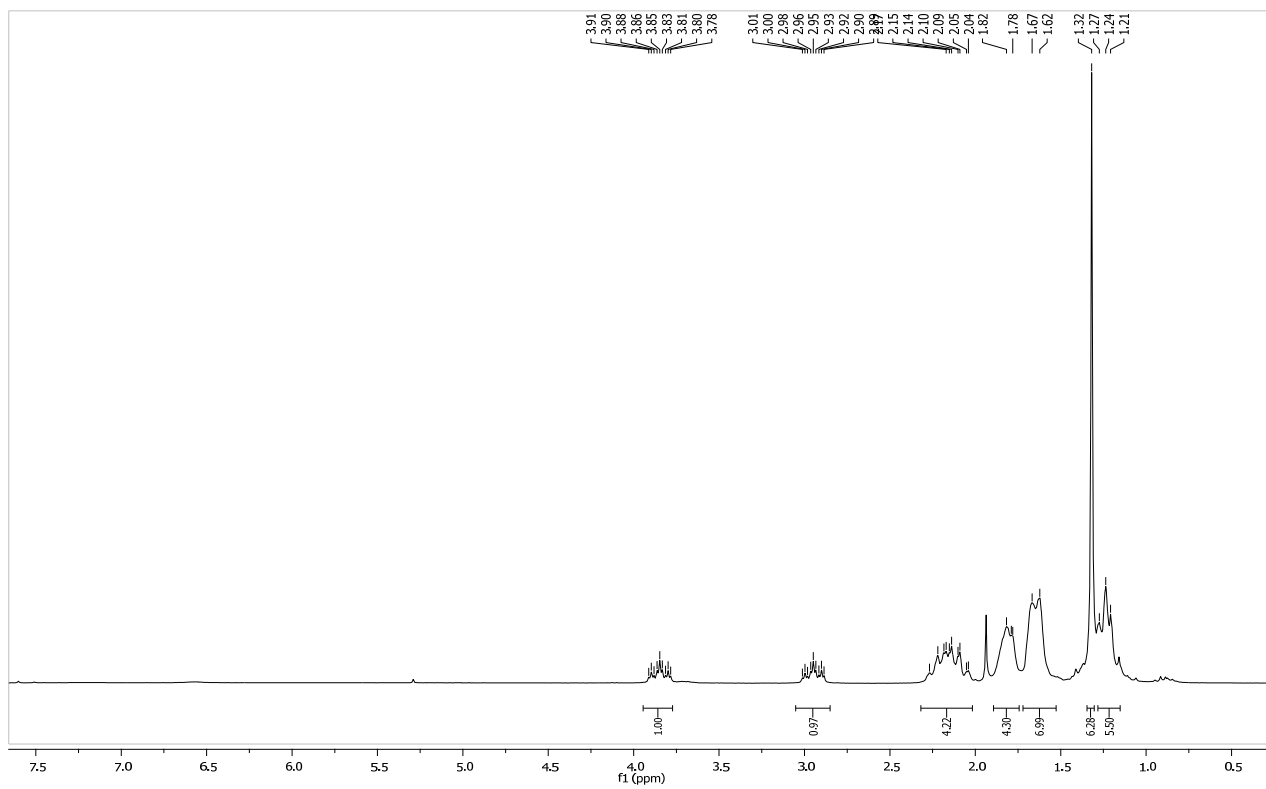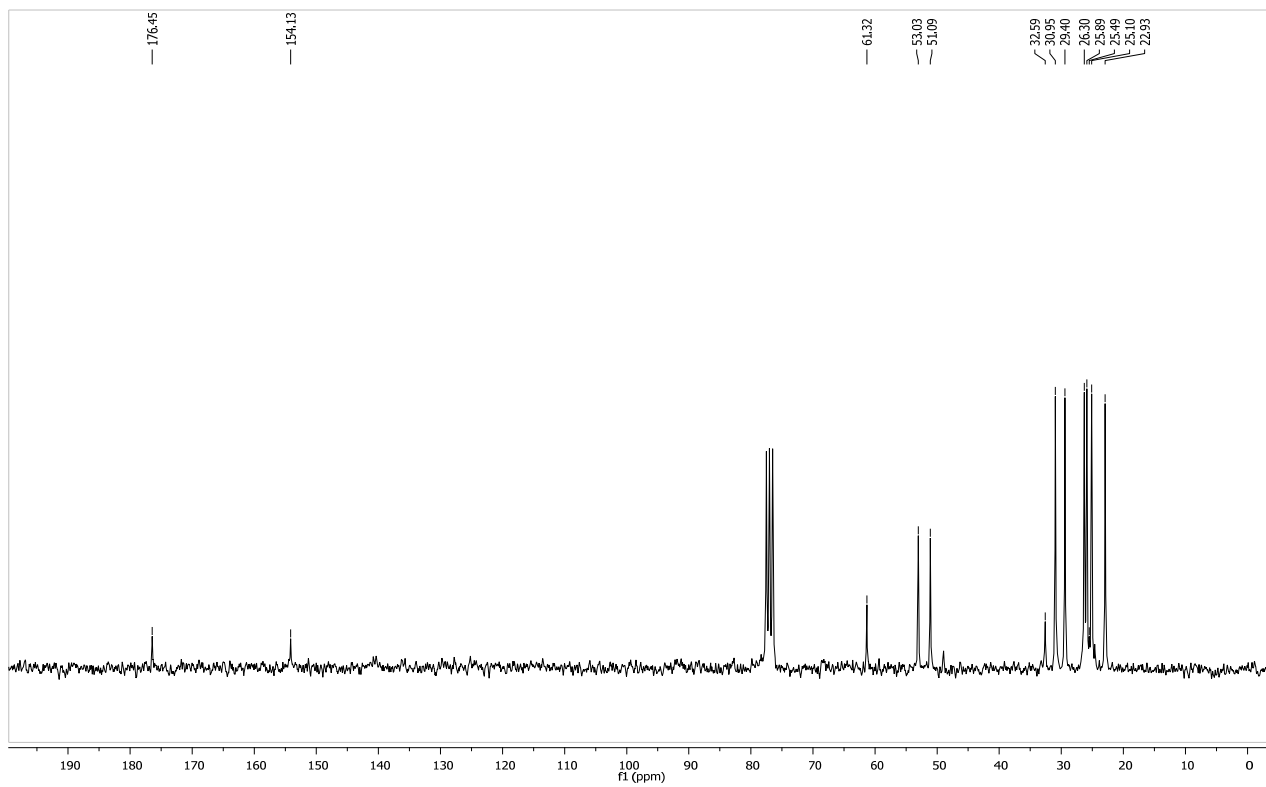



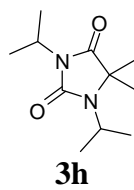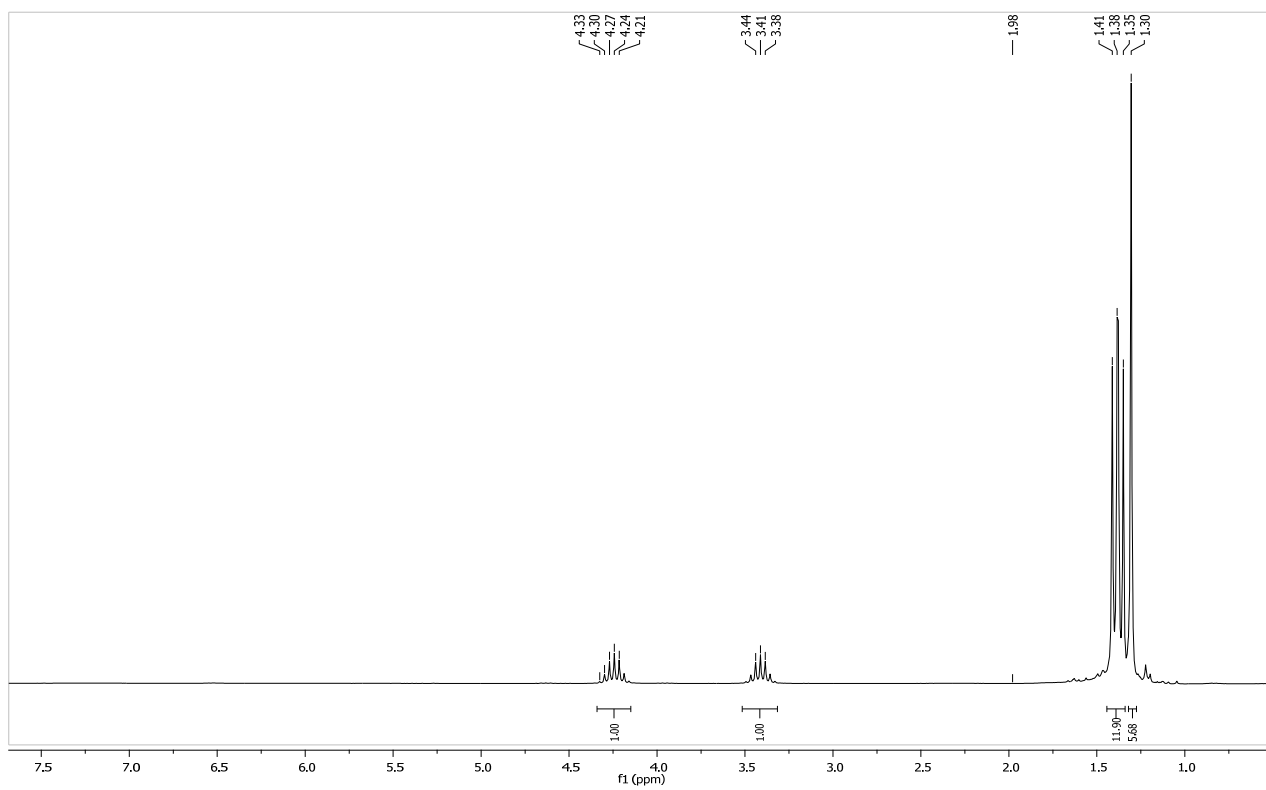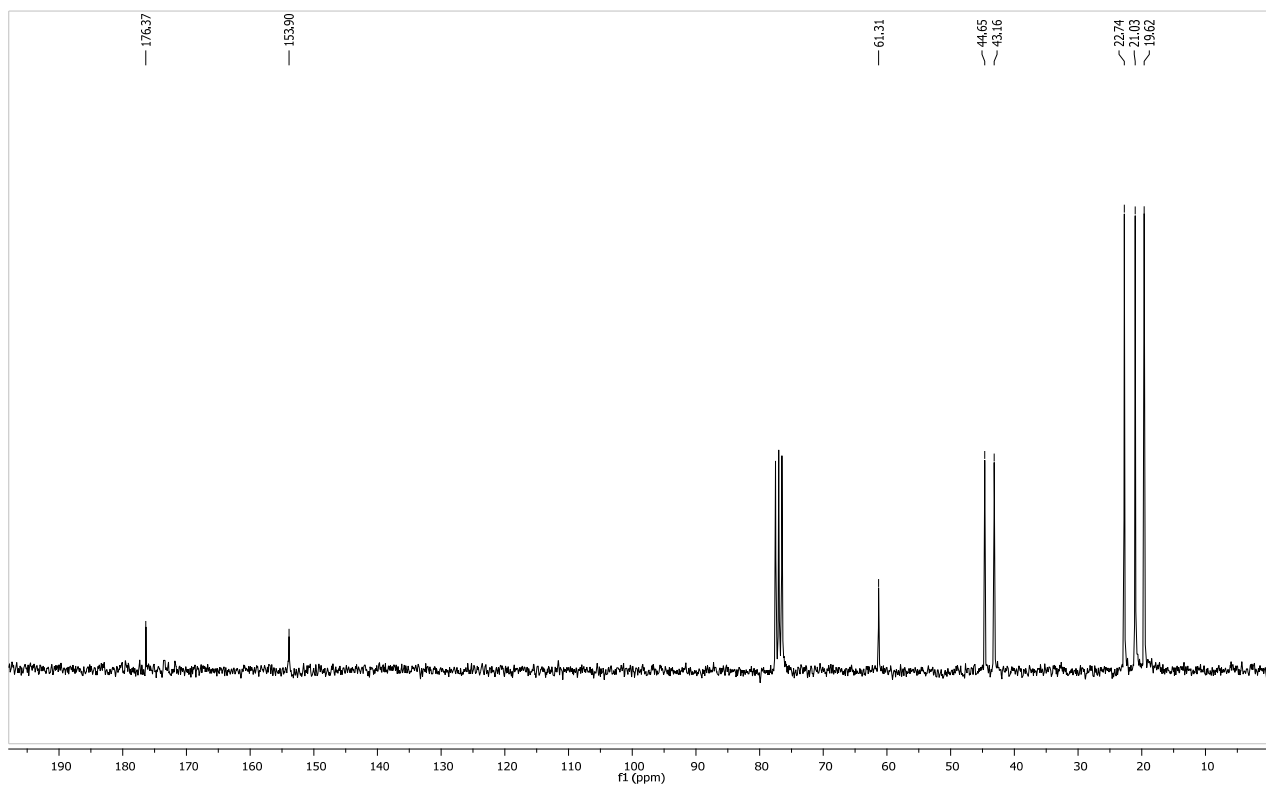

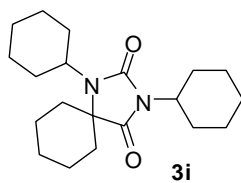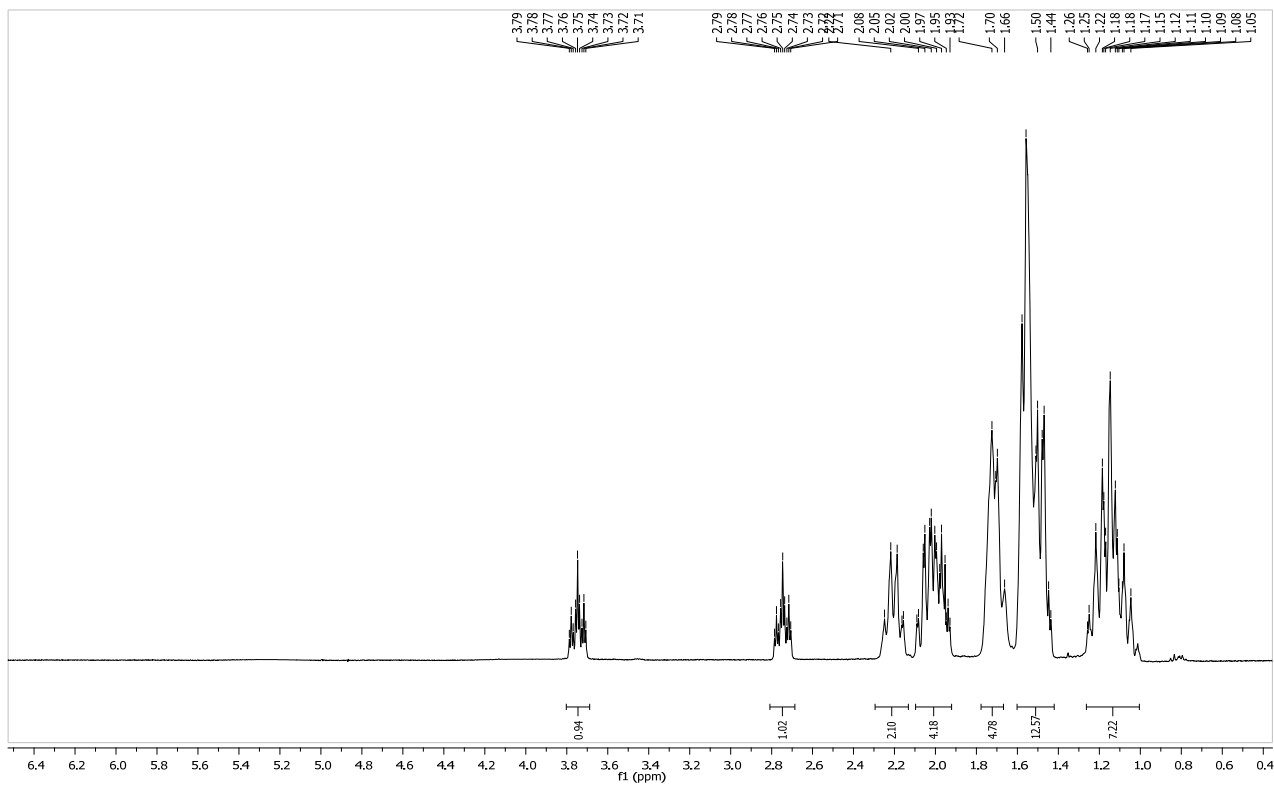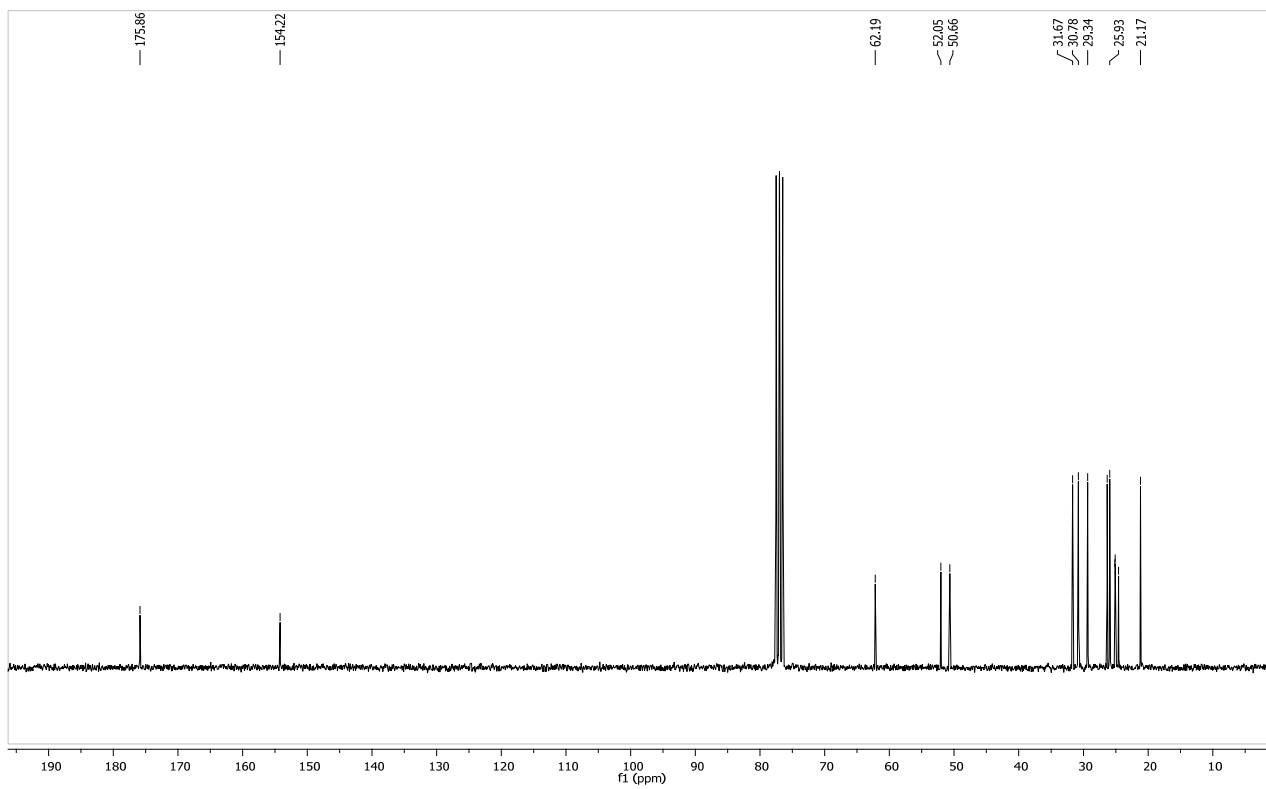

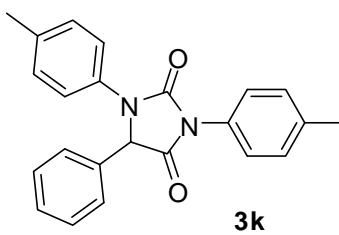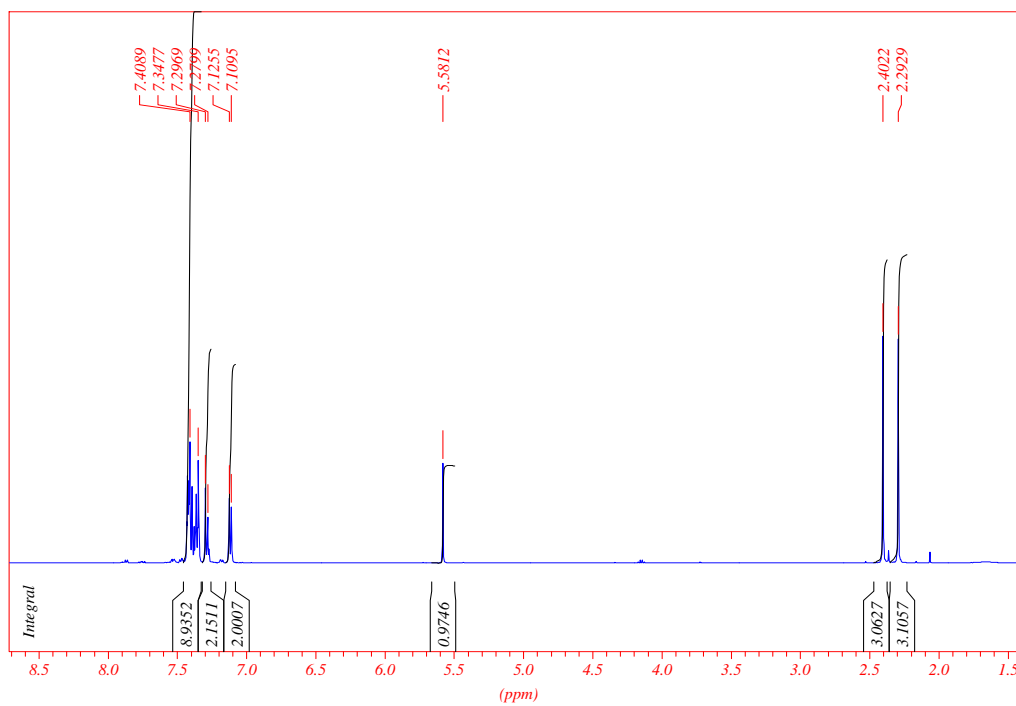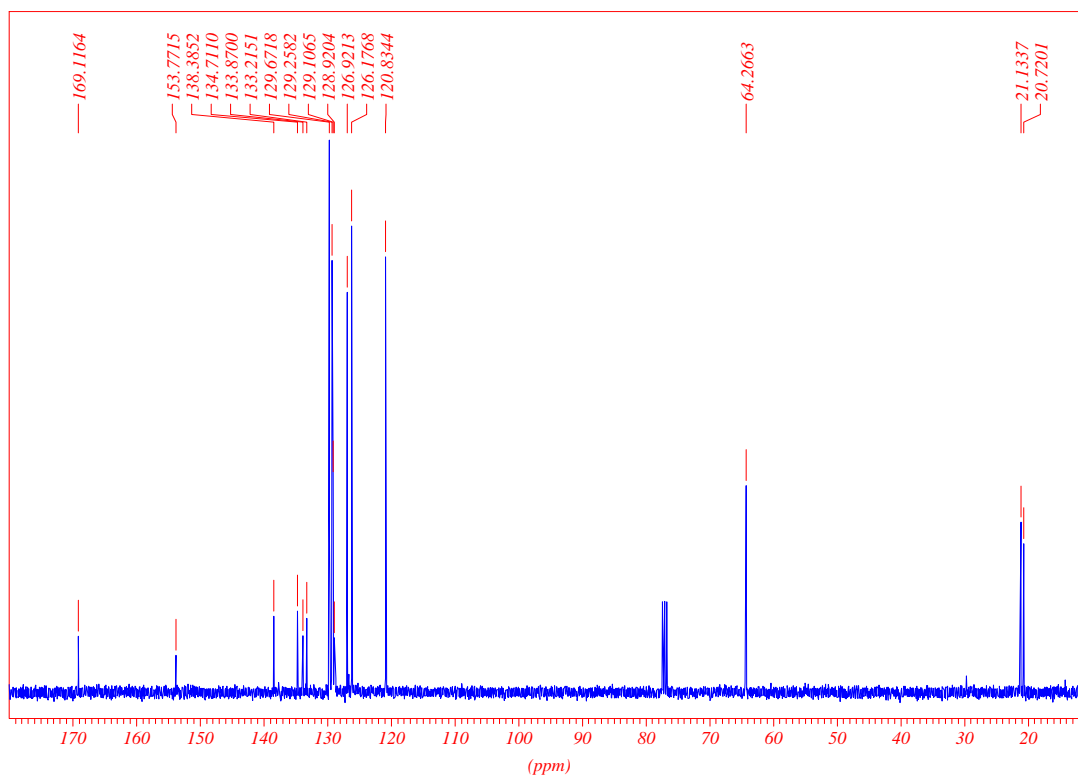

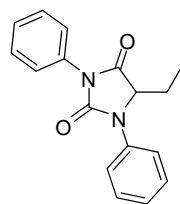

**31**

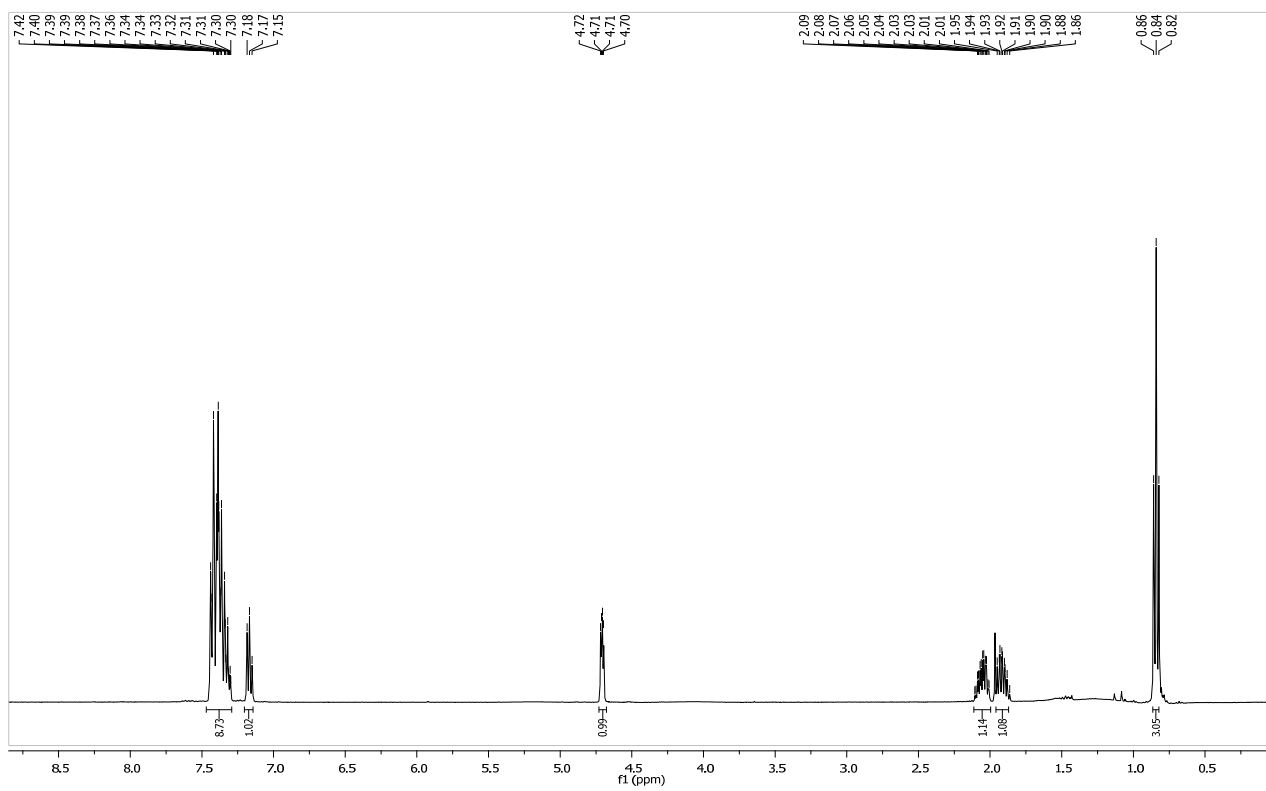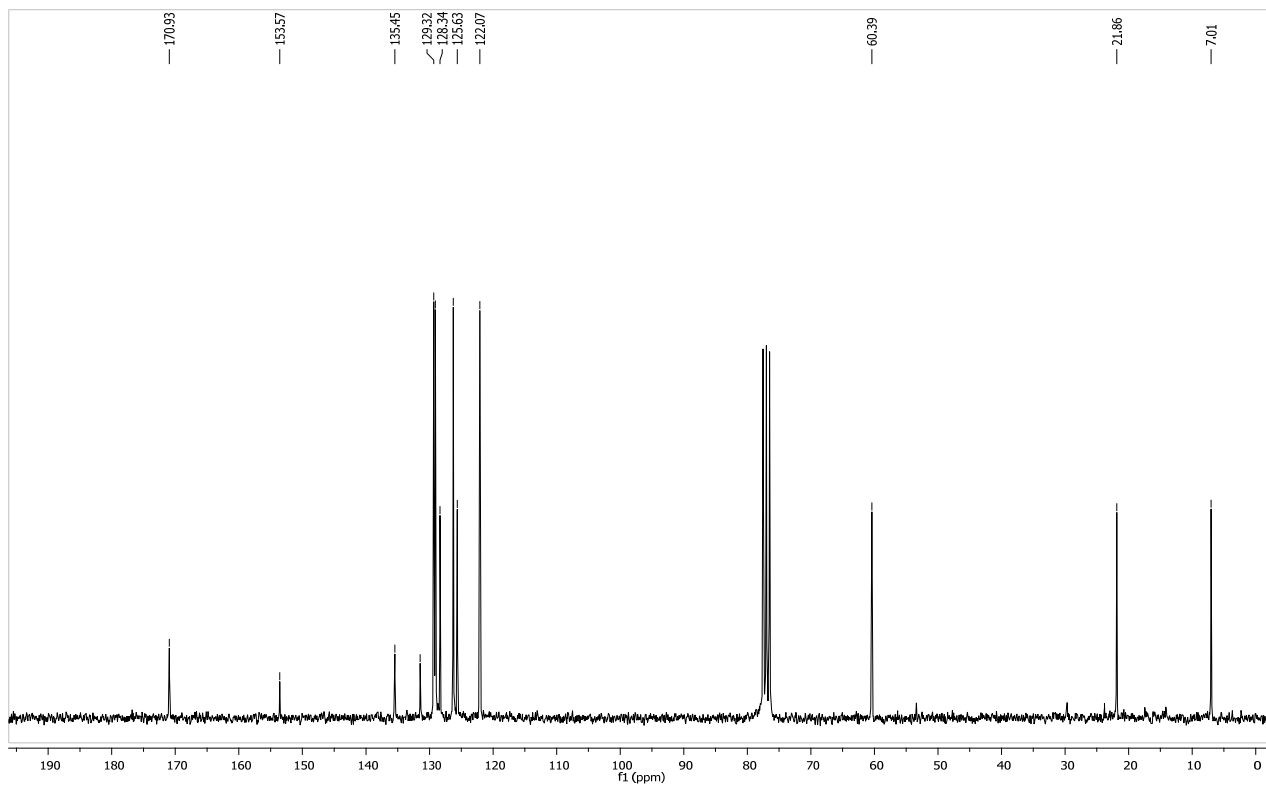

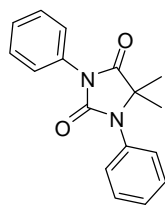

**3m**

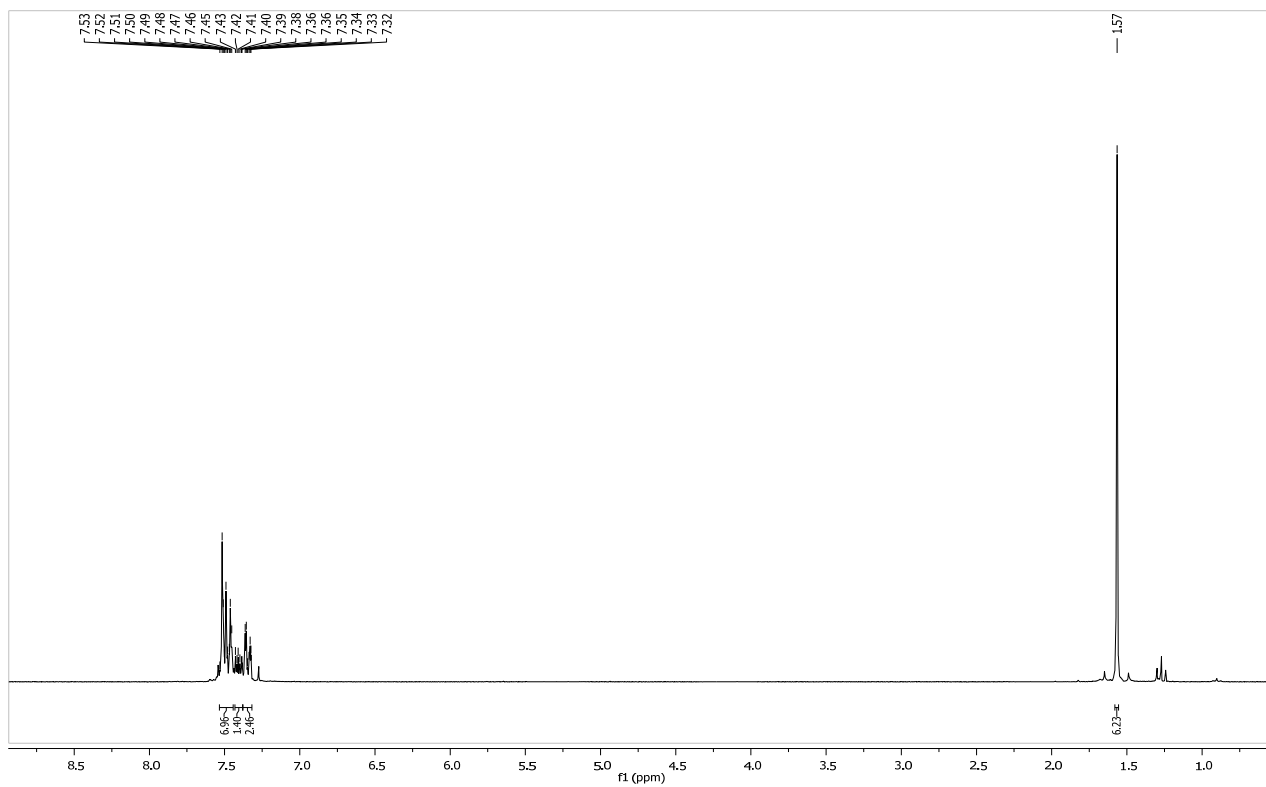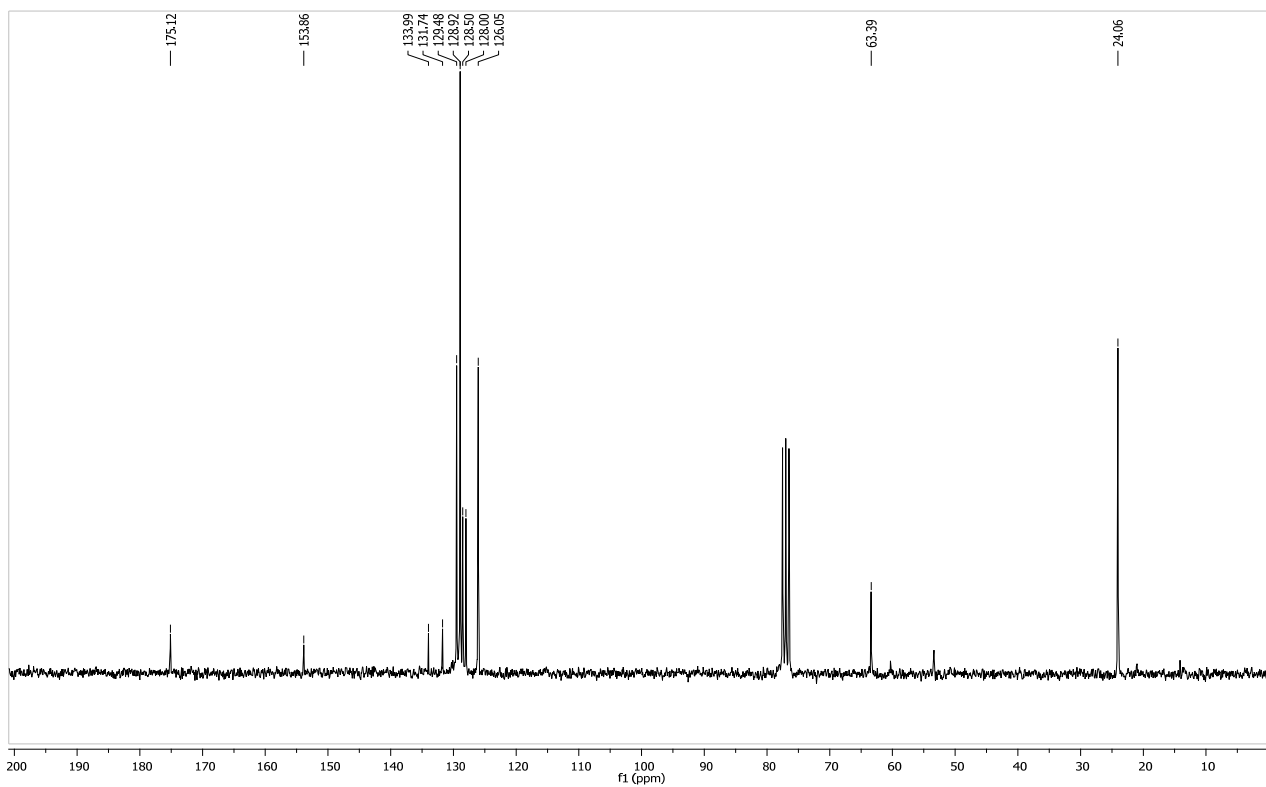

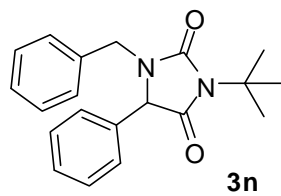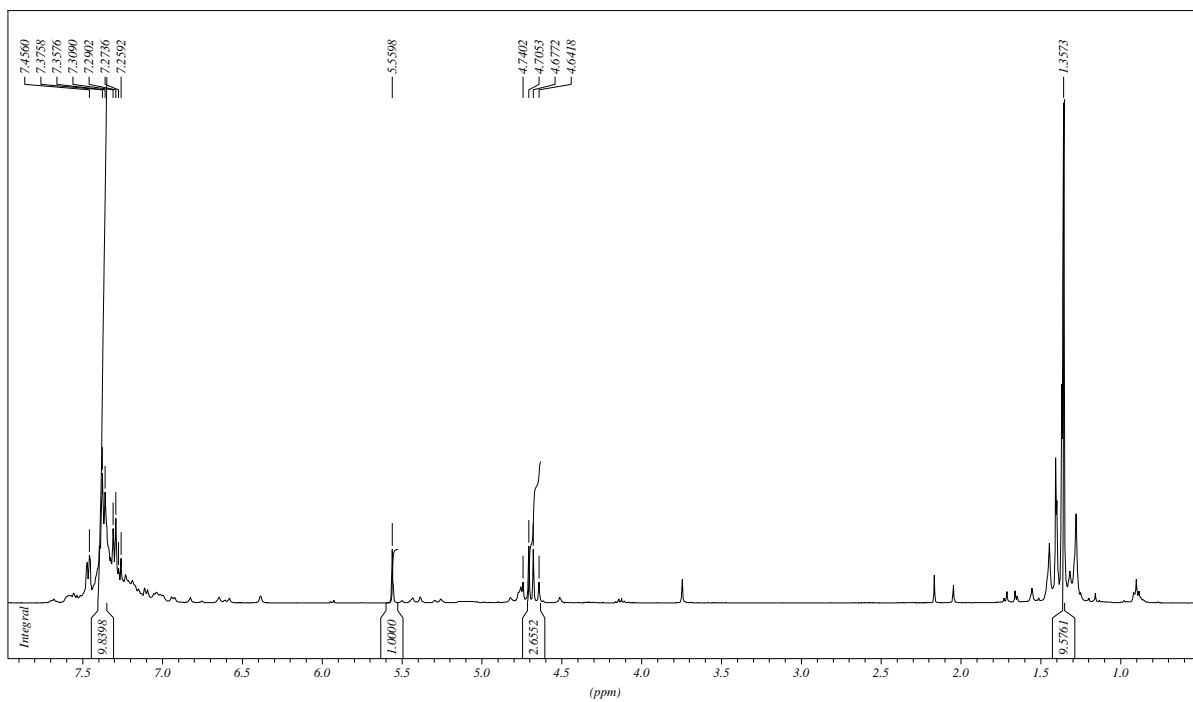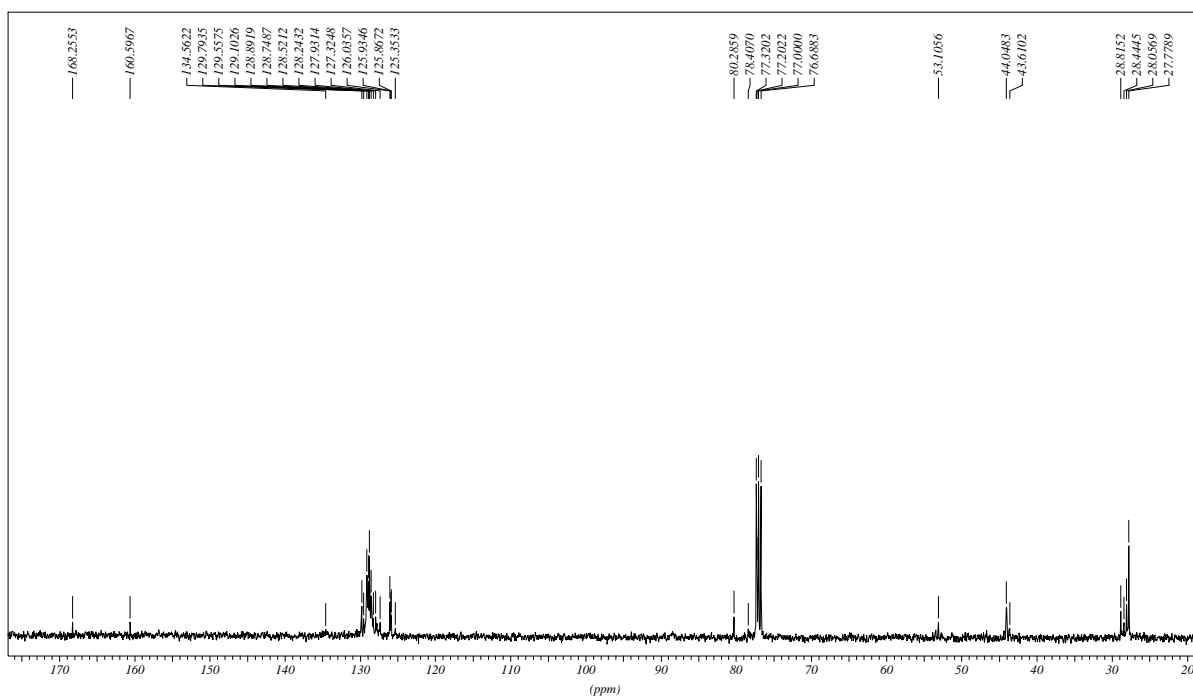

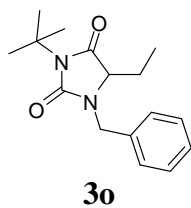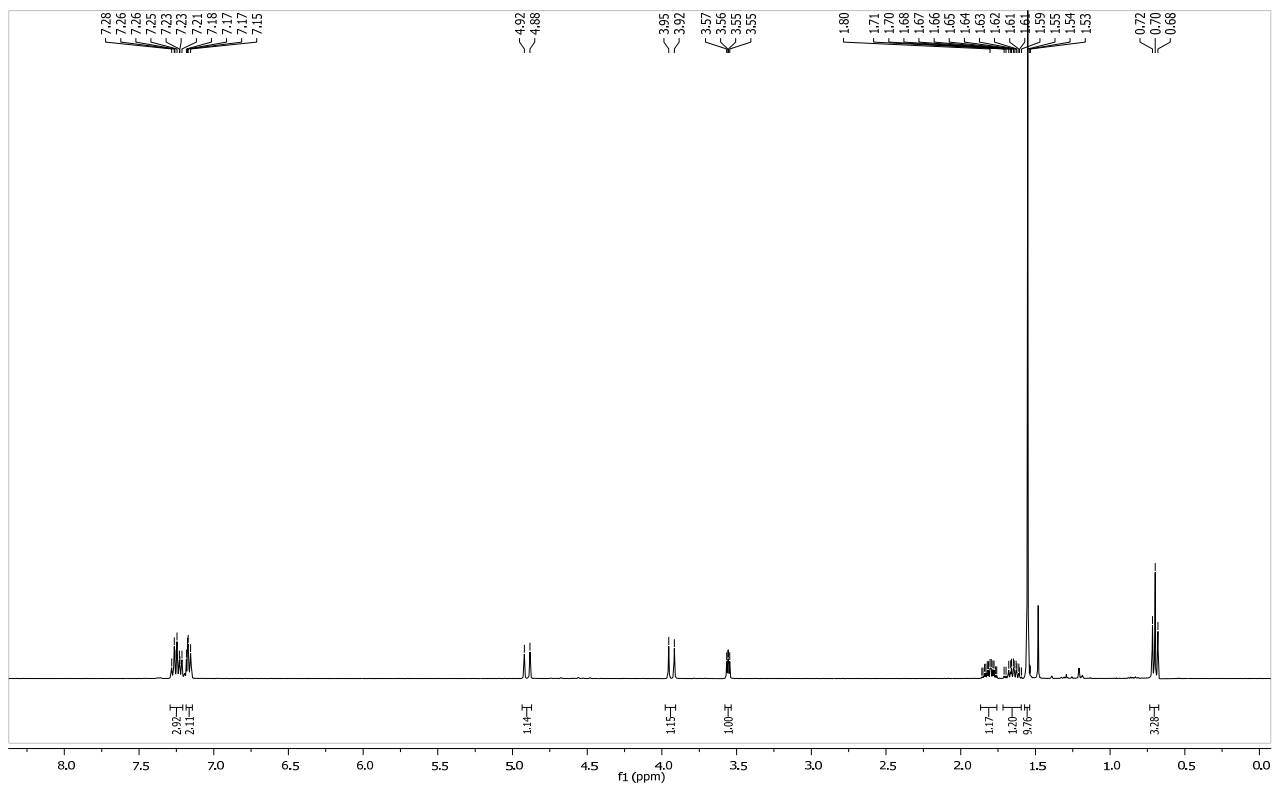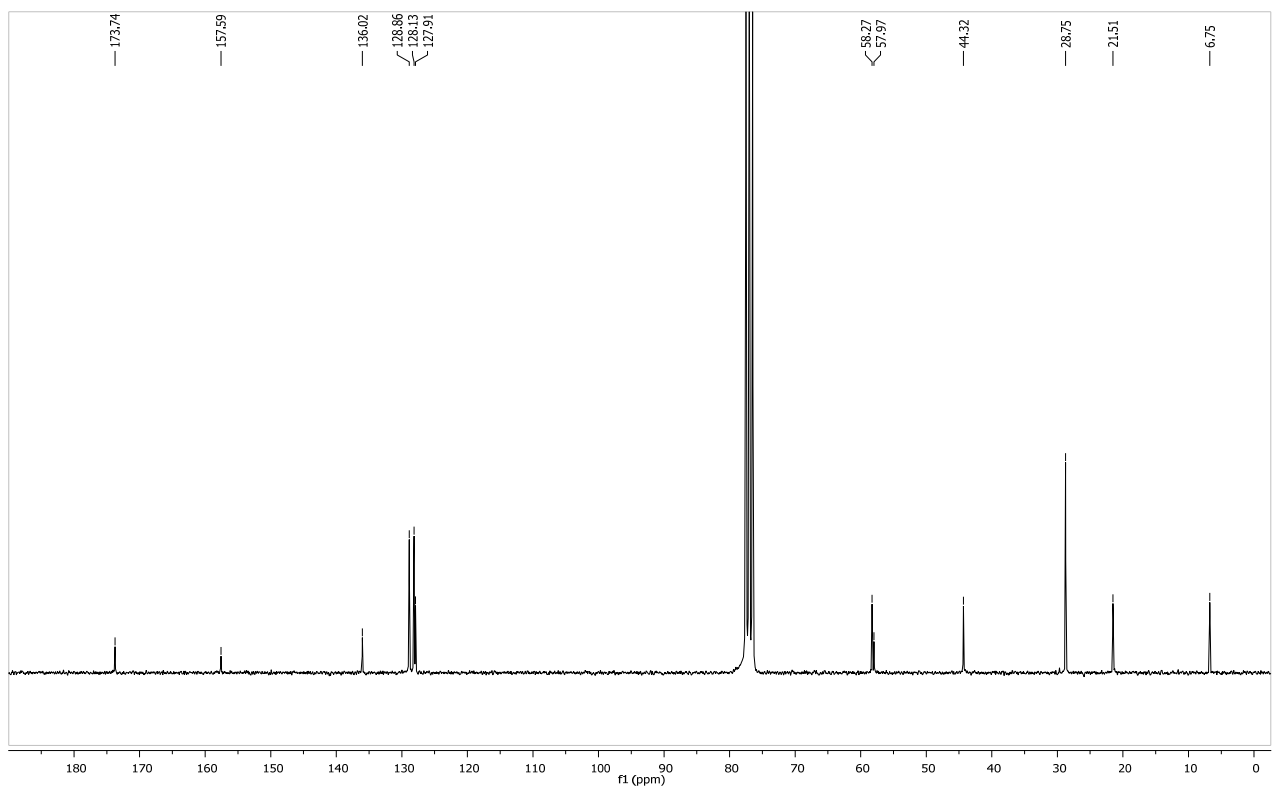

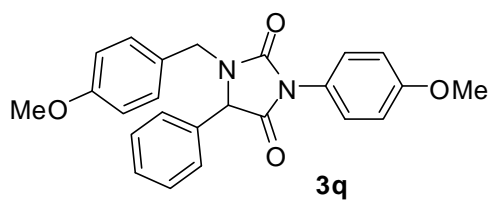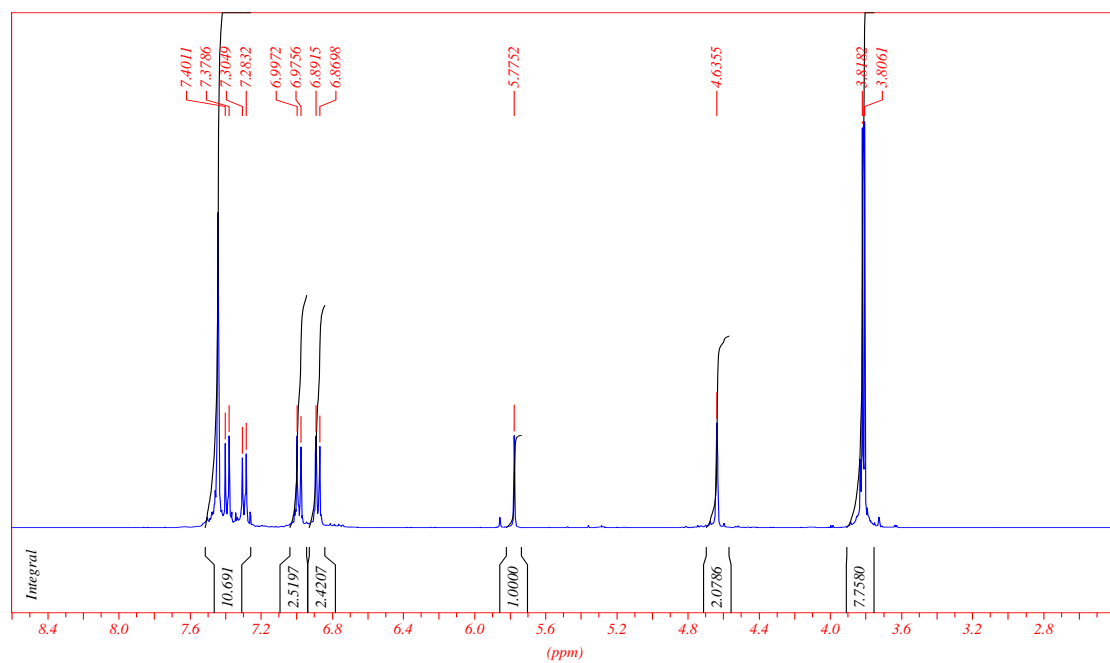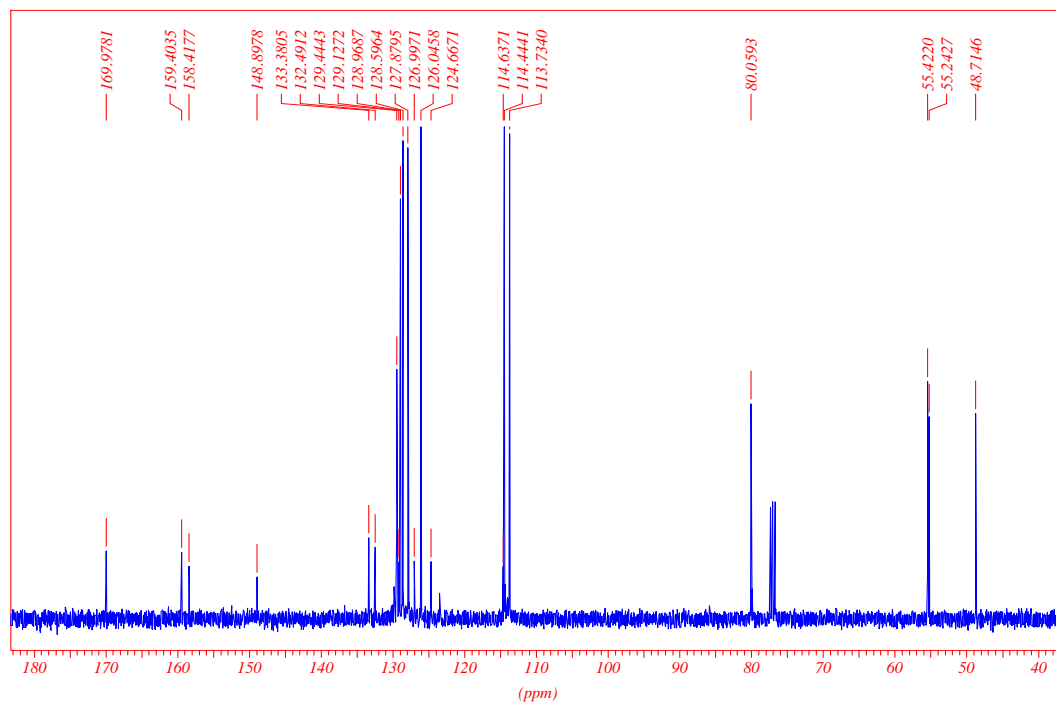



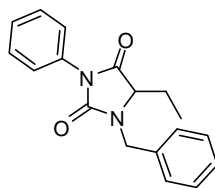

**3r**

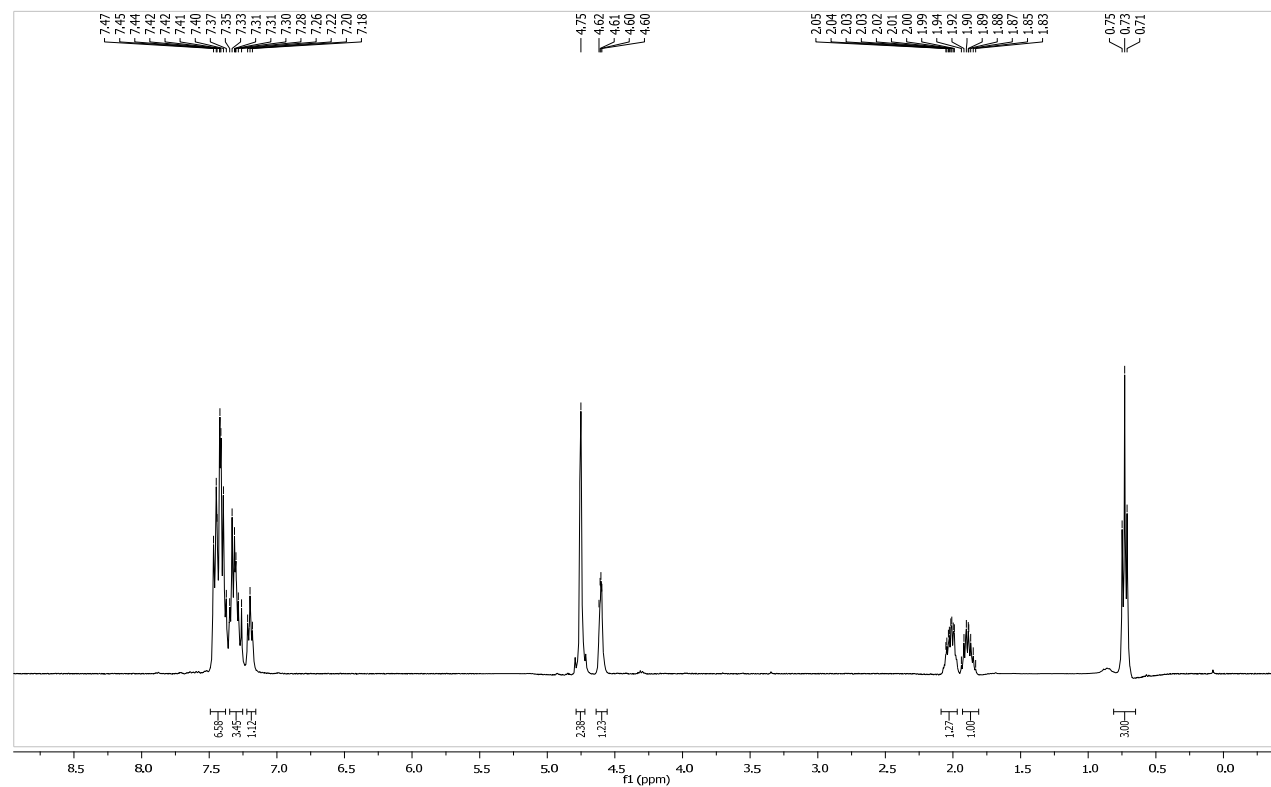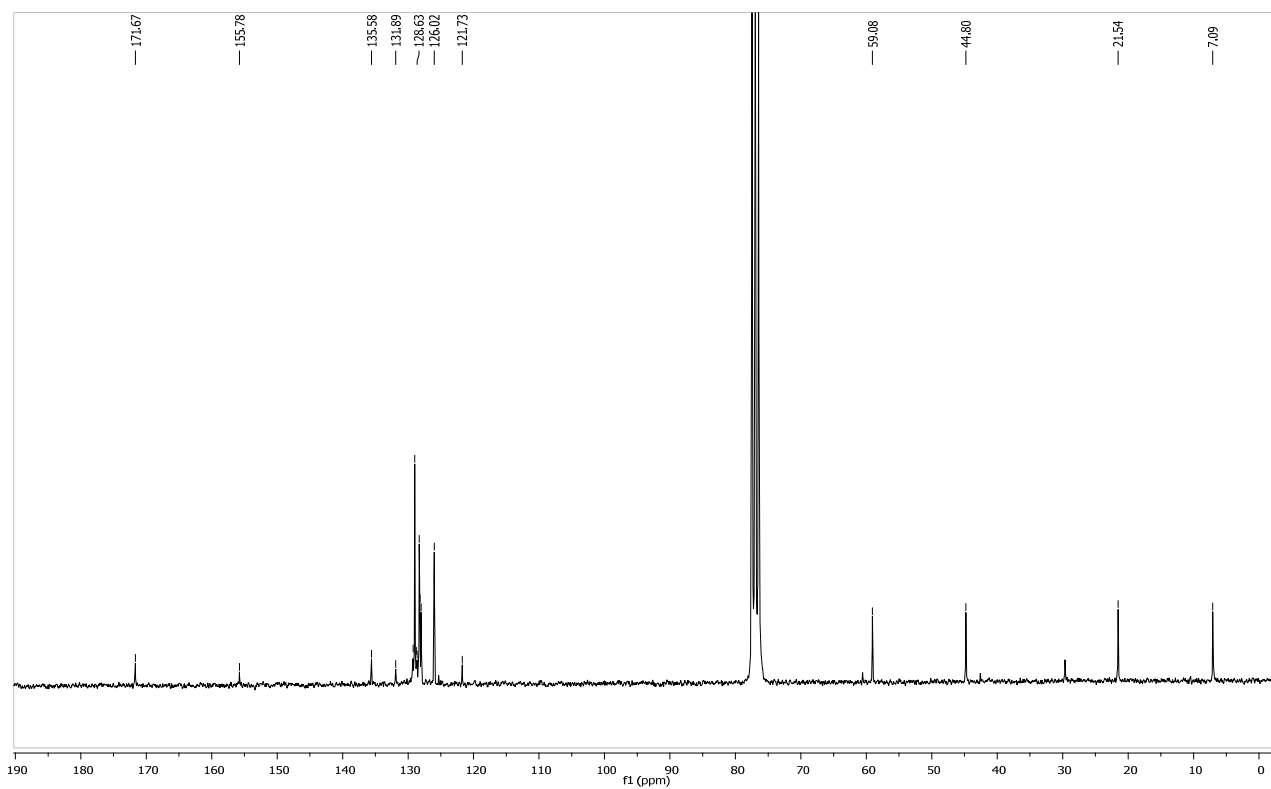

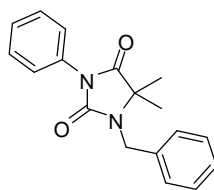

**3s**

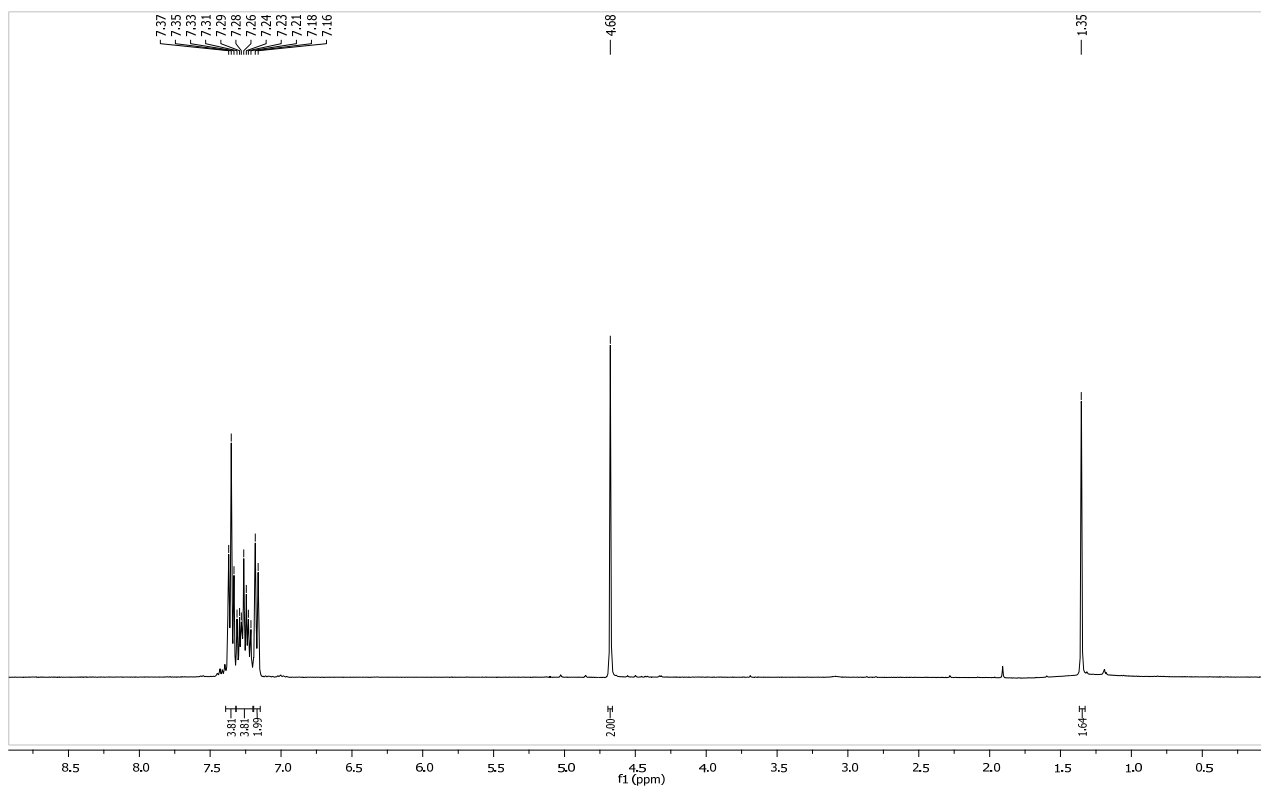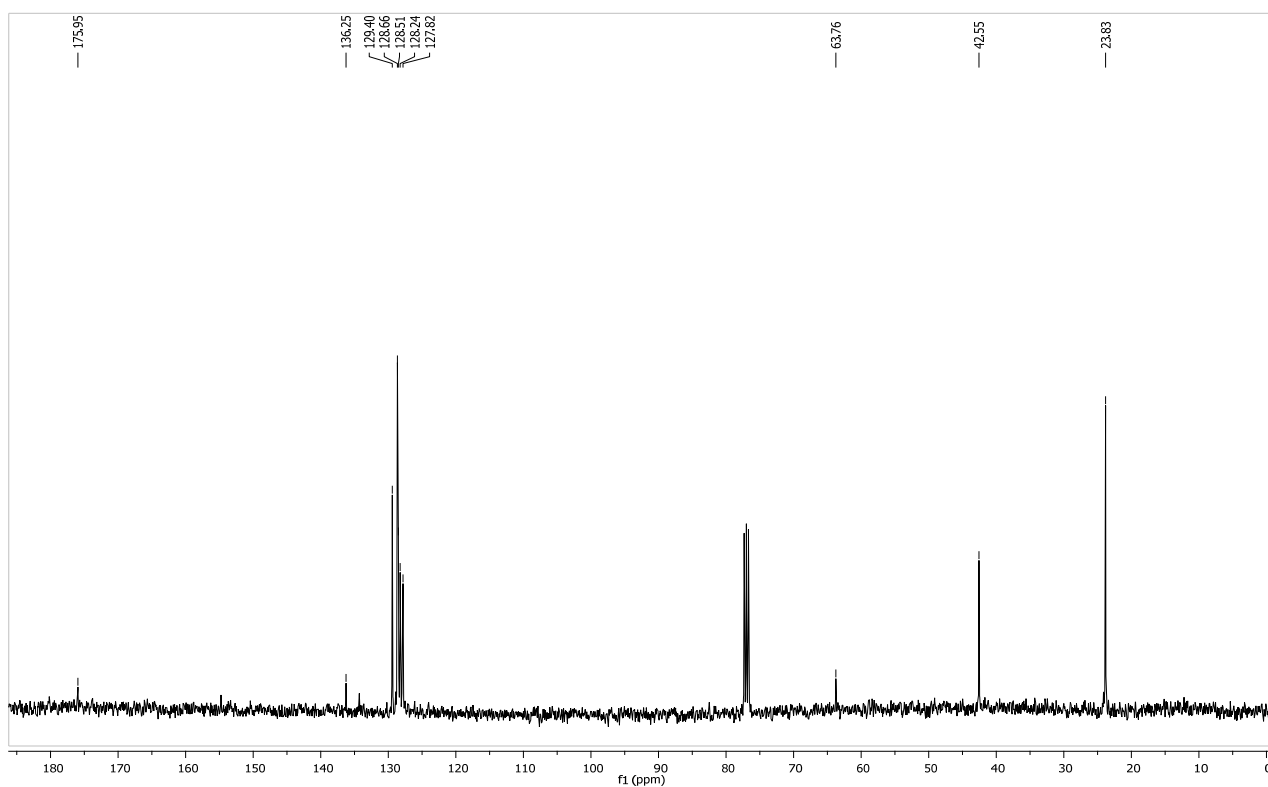

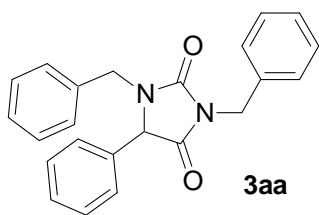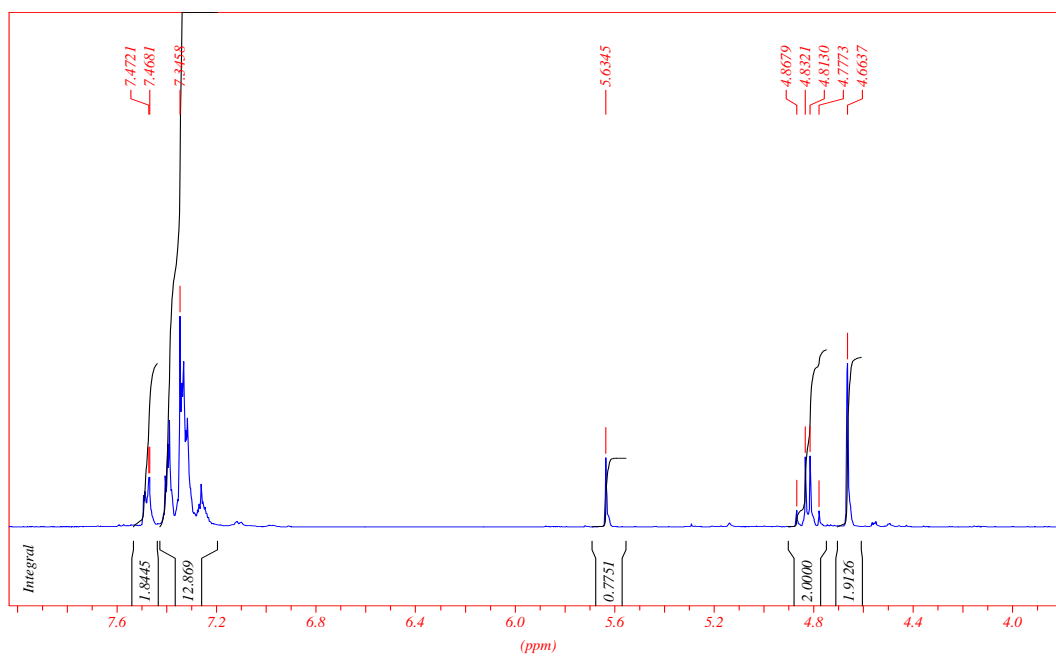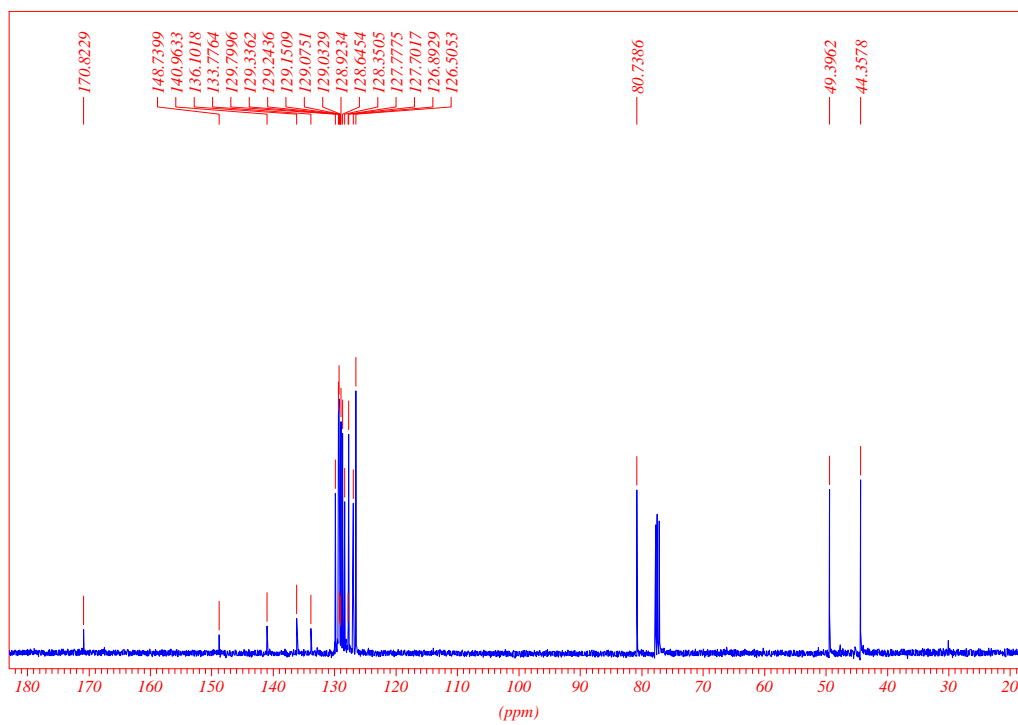

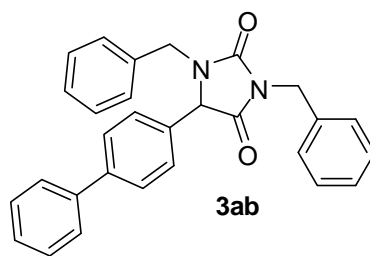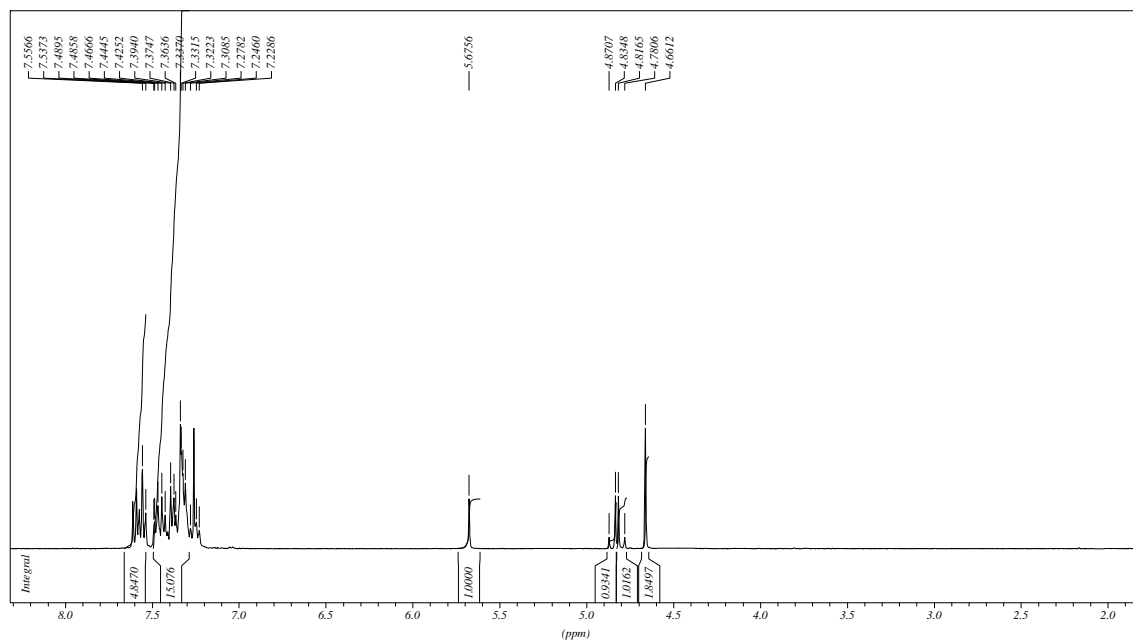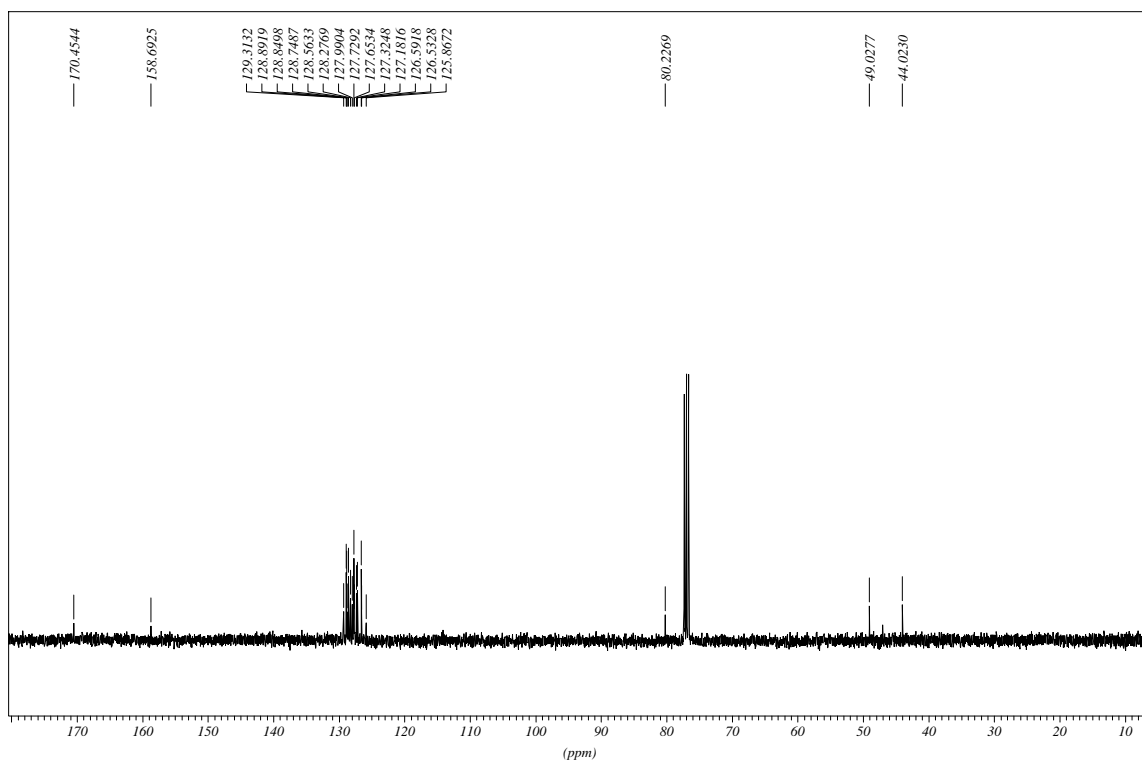

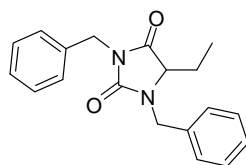

**3ac**

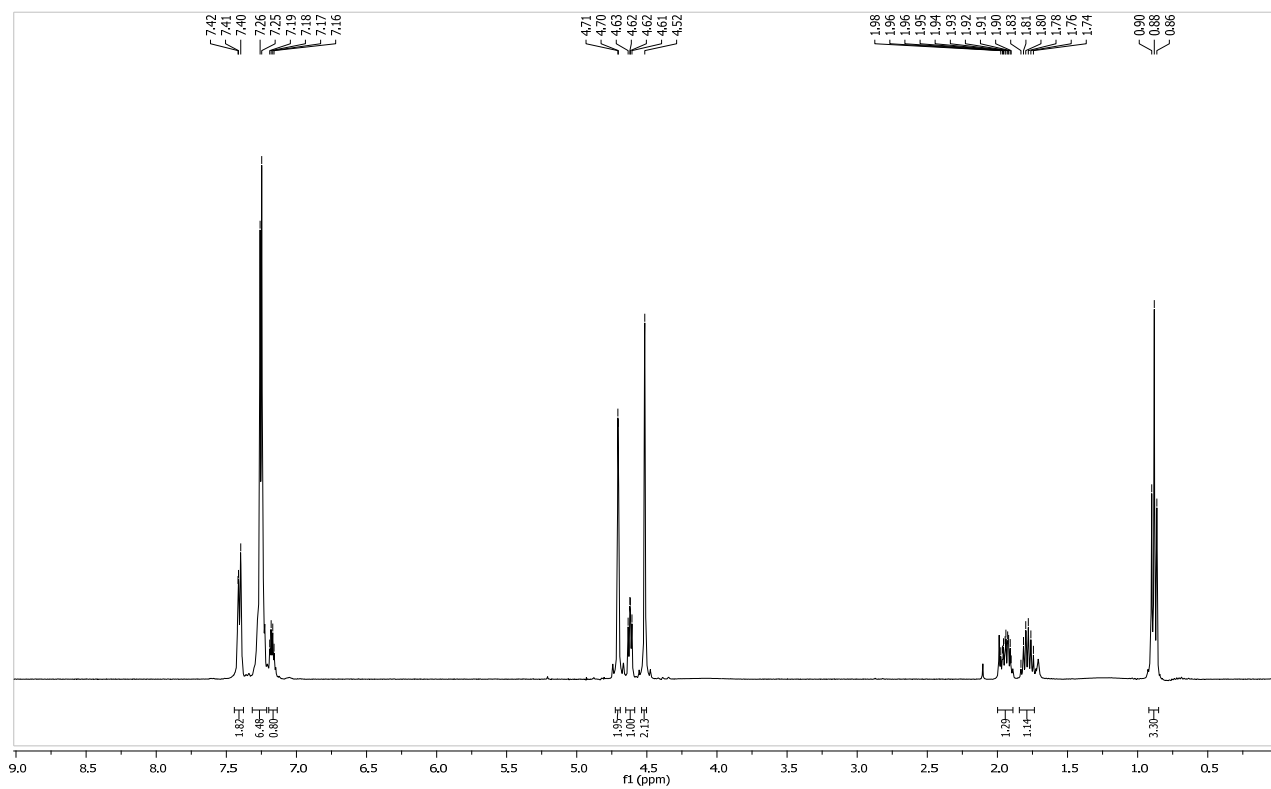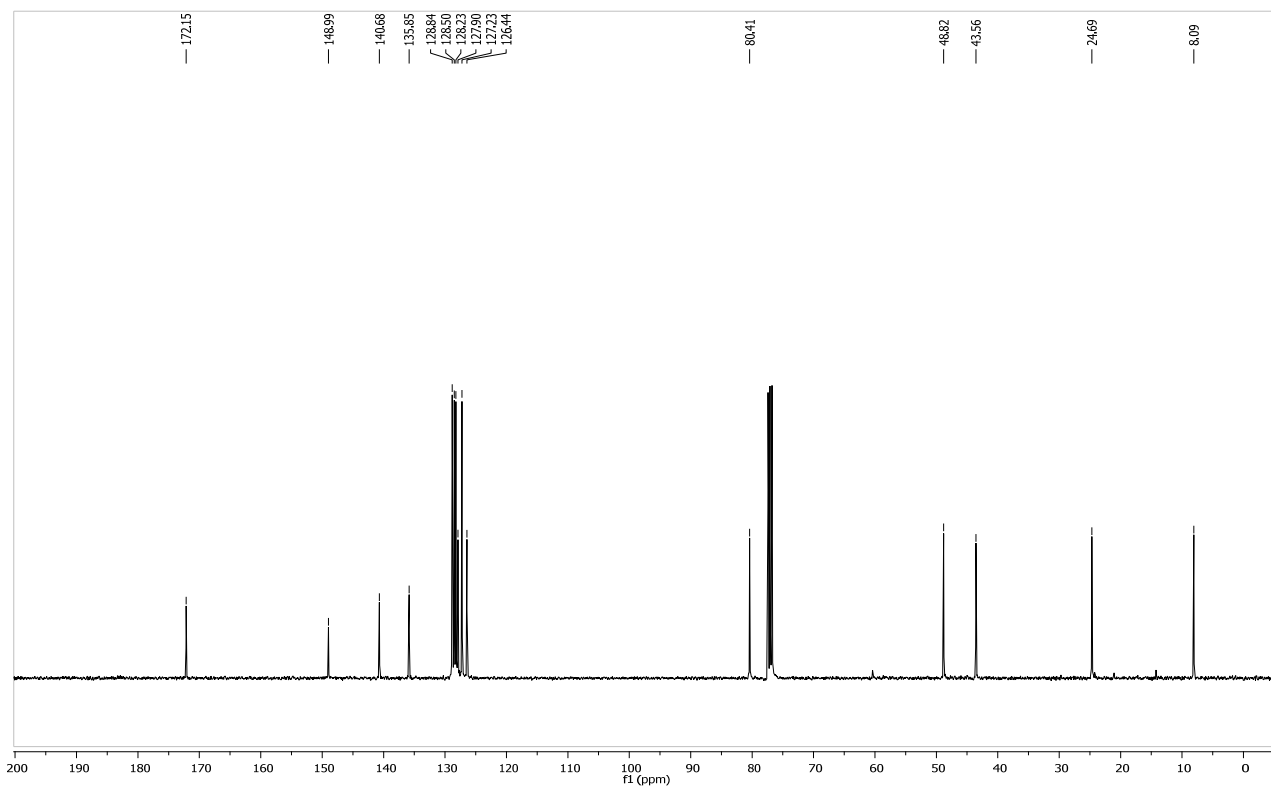

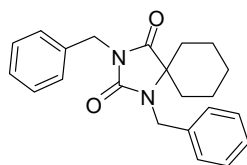

**3ad**

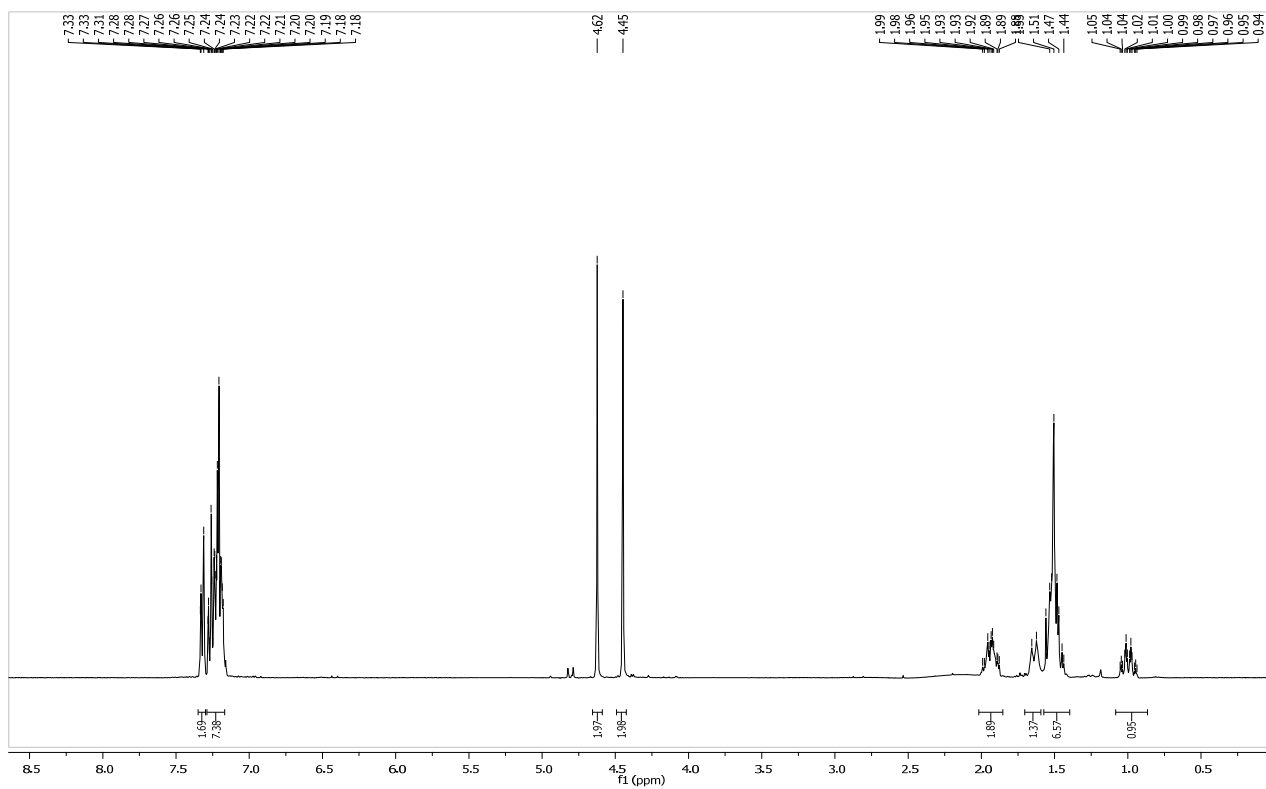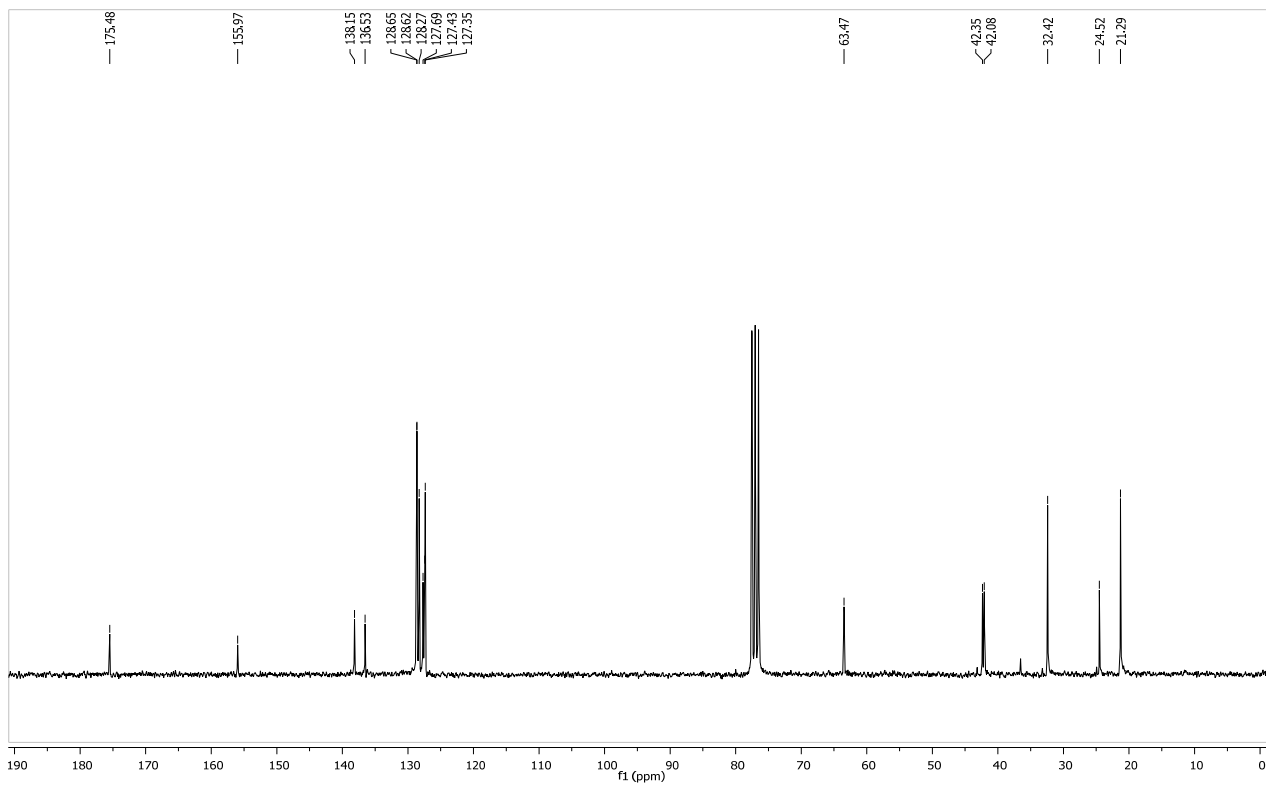

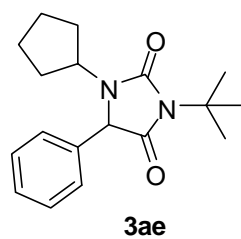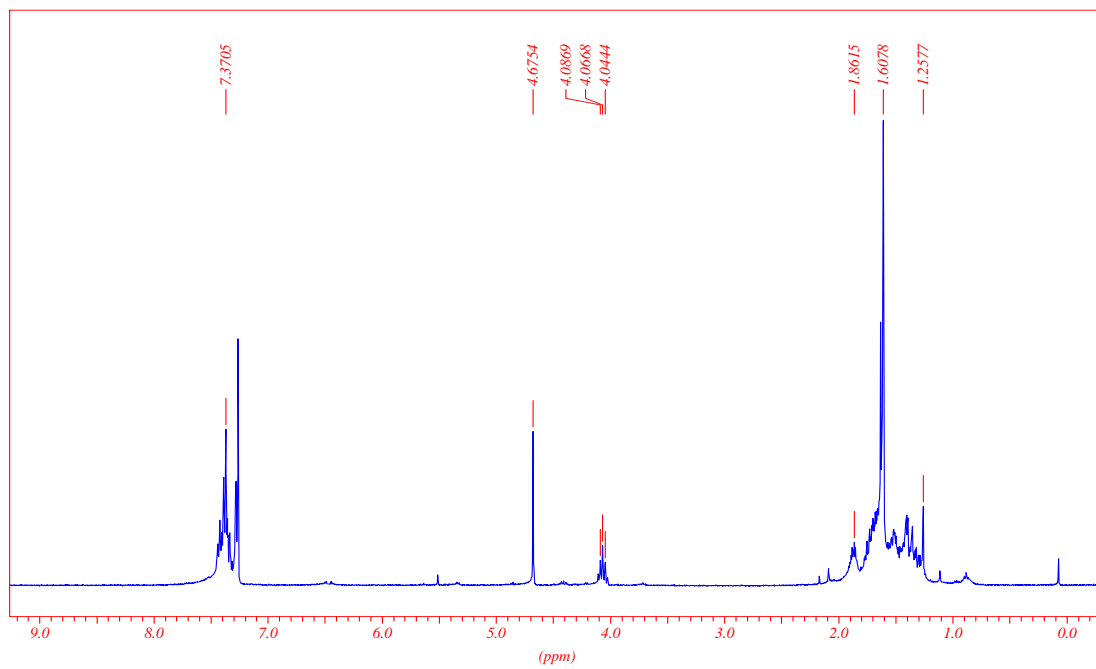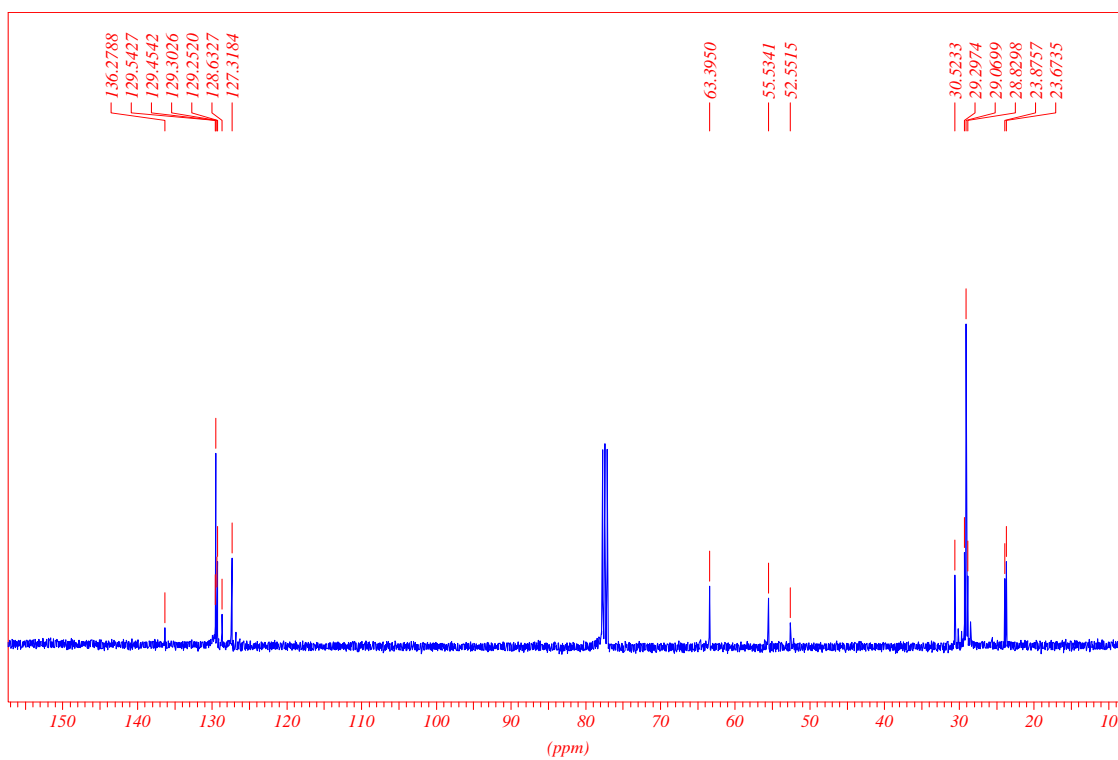

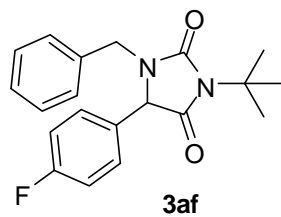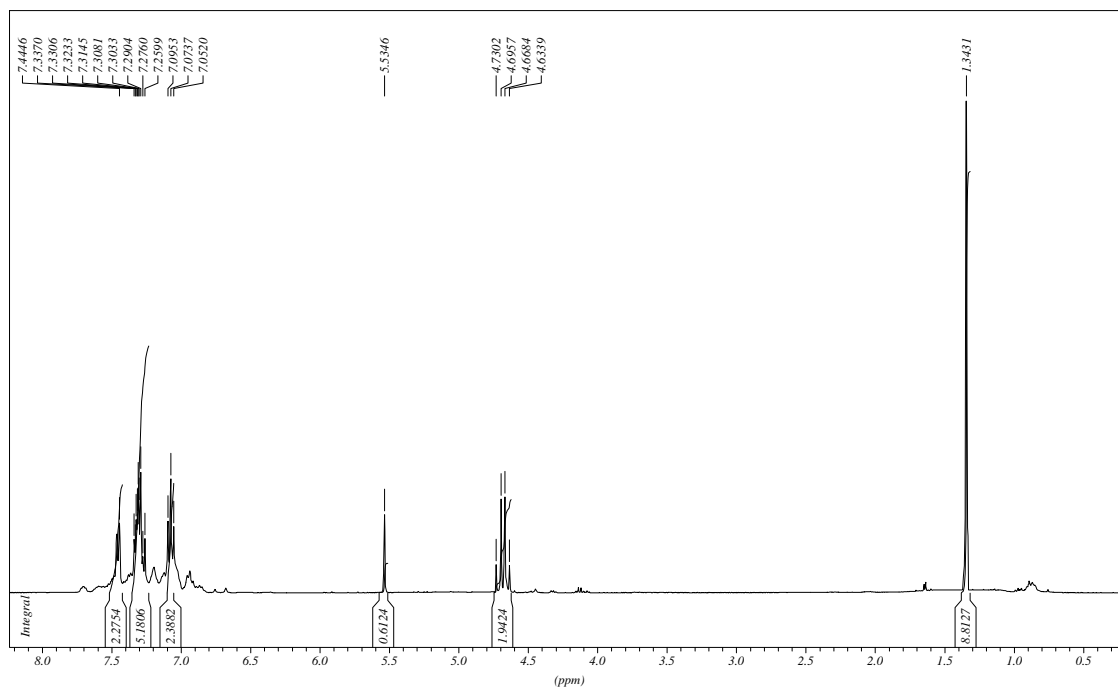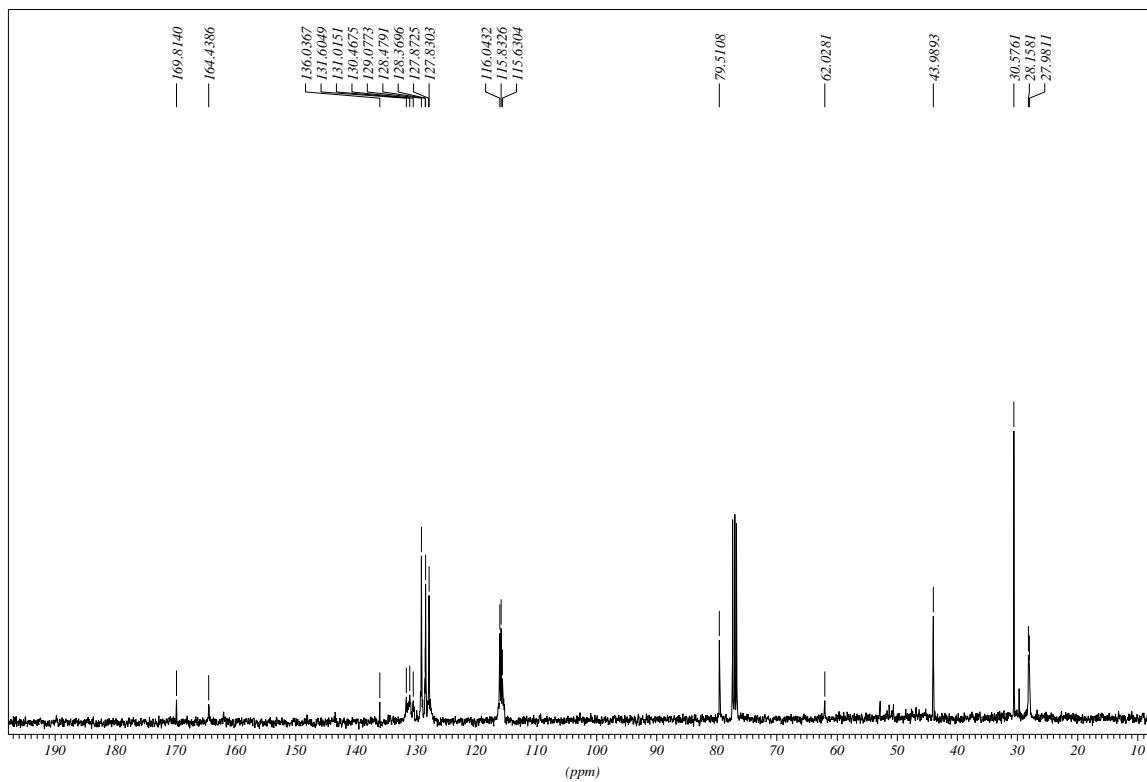



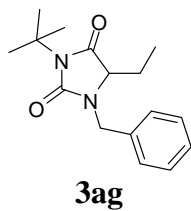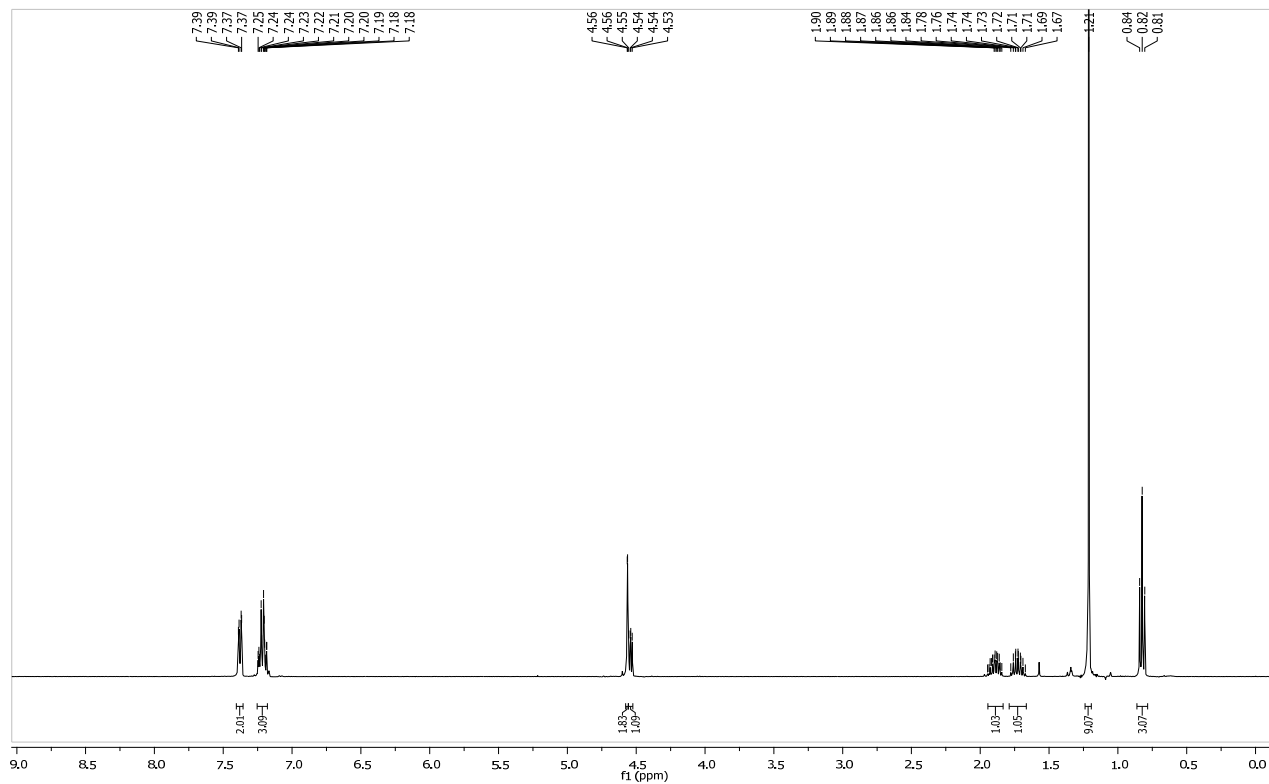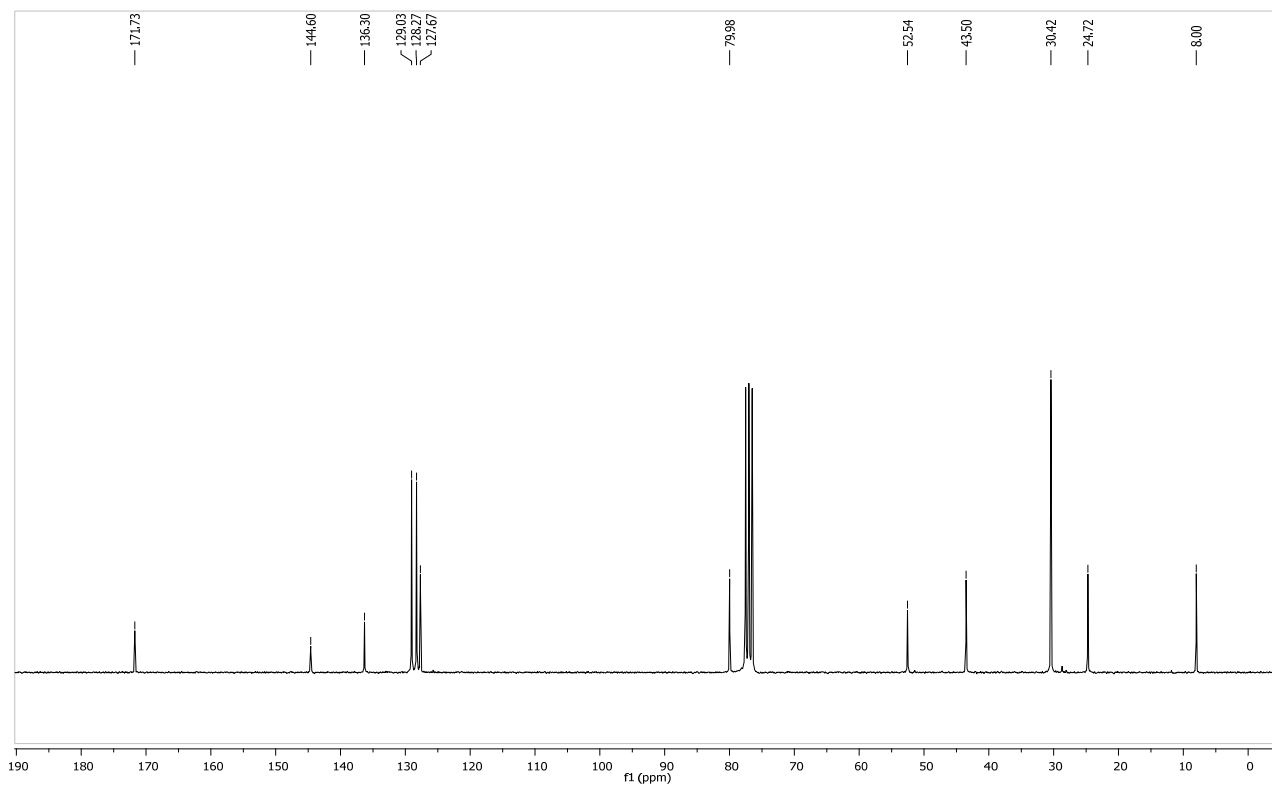

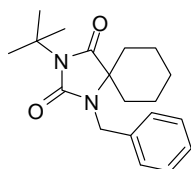

**3ah**

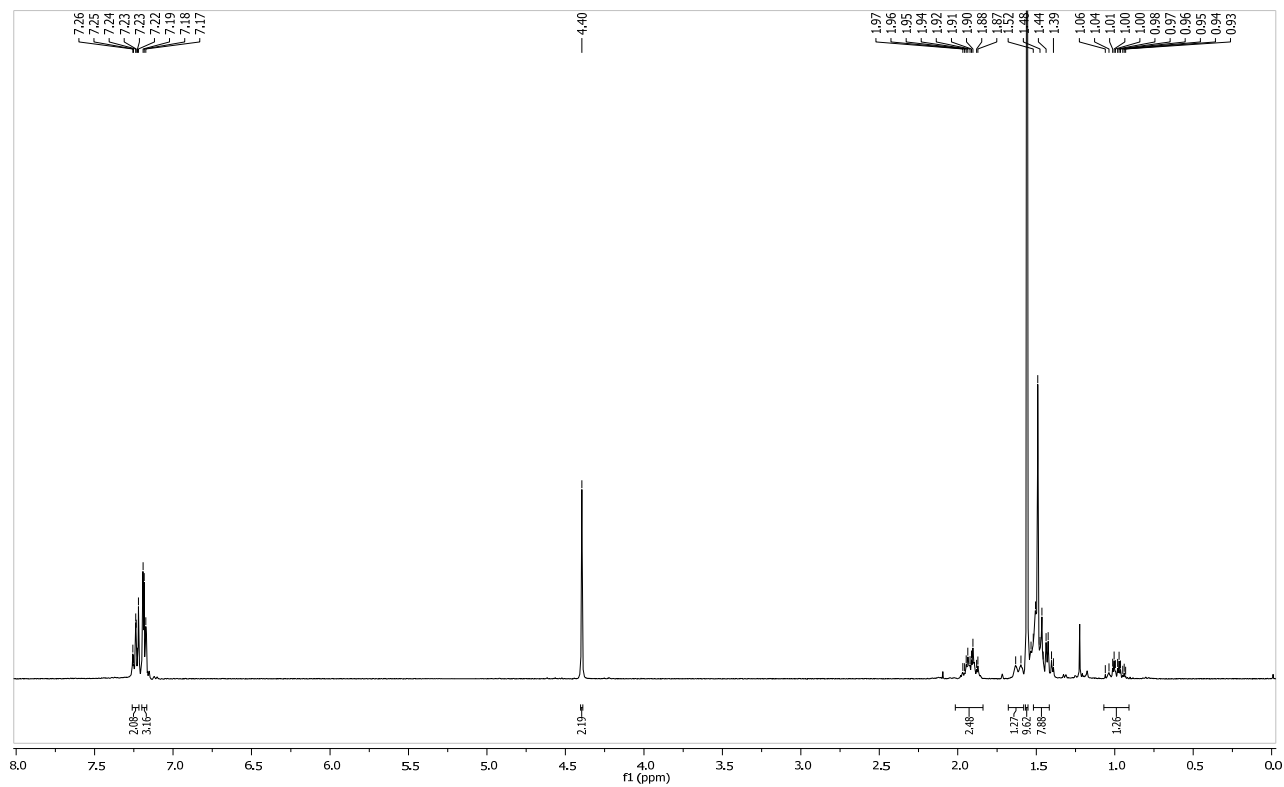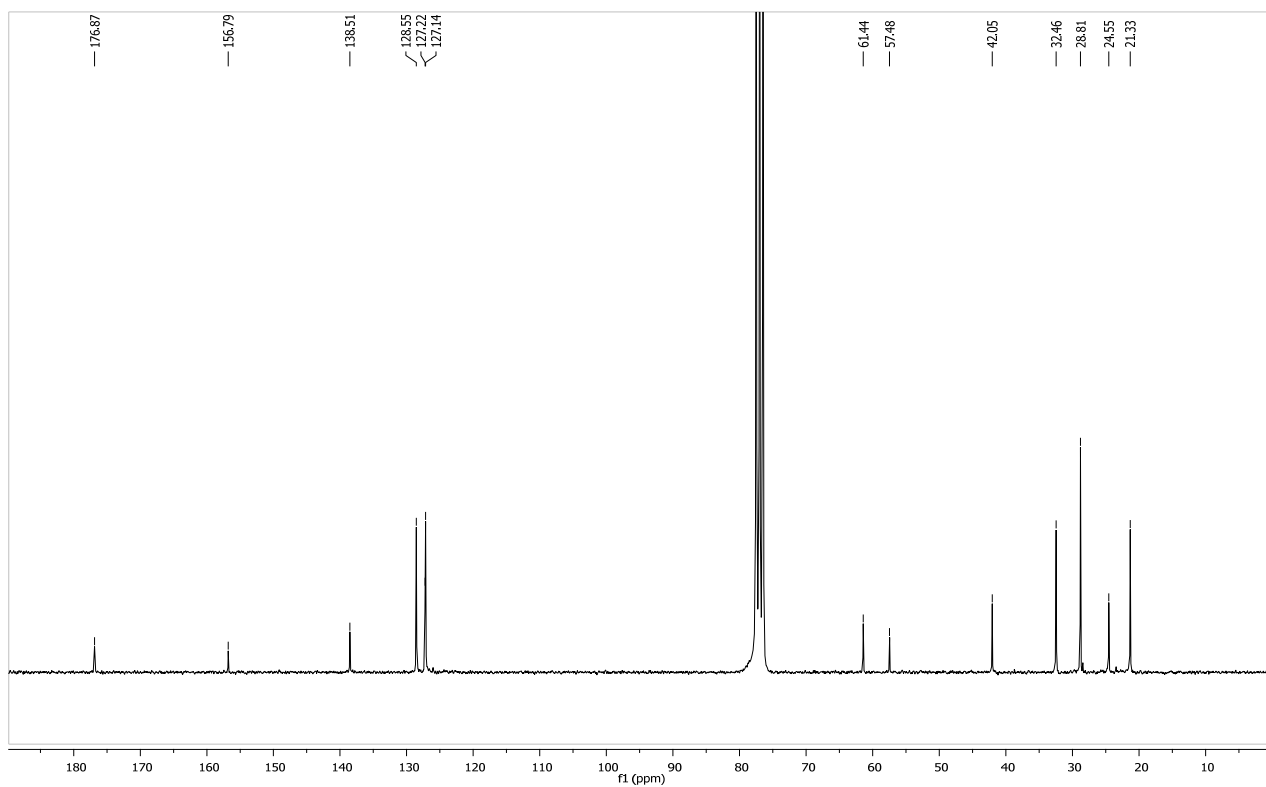

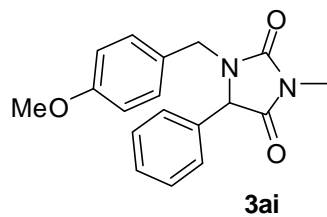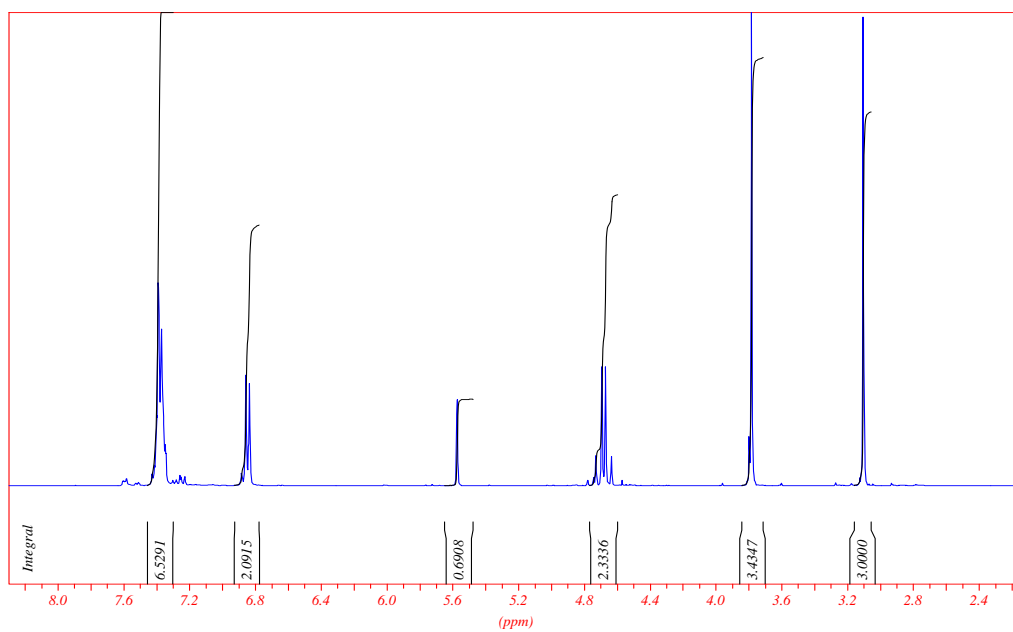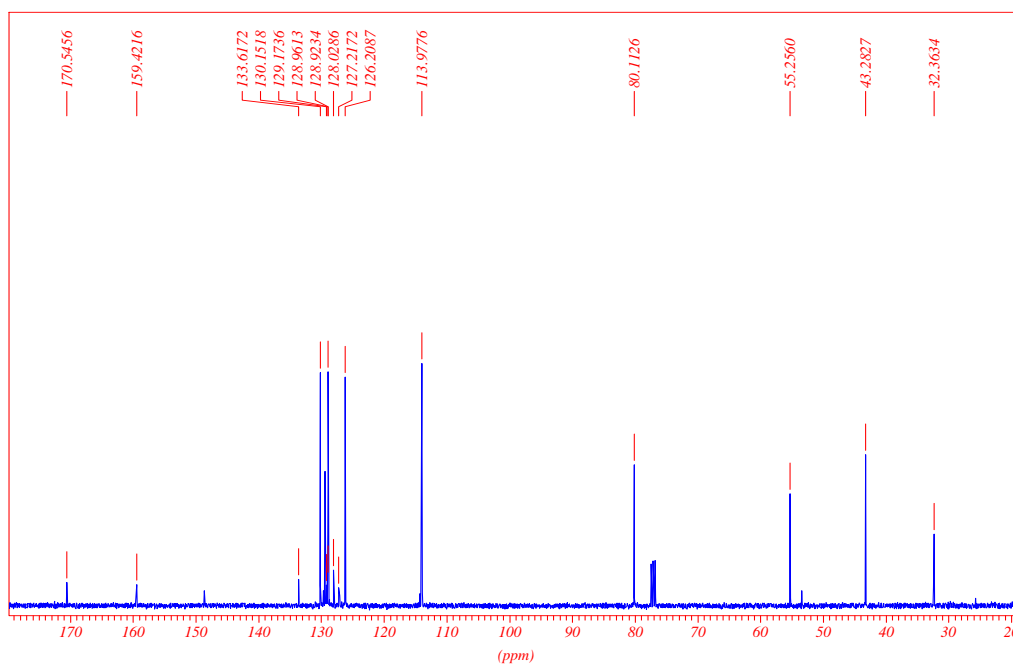

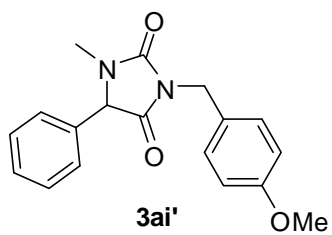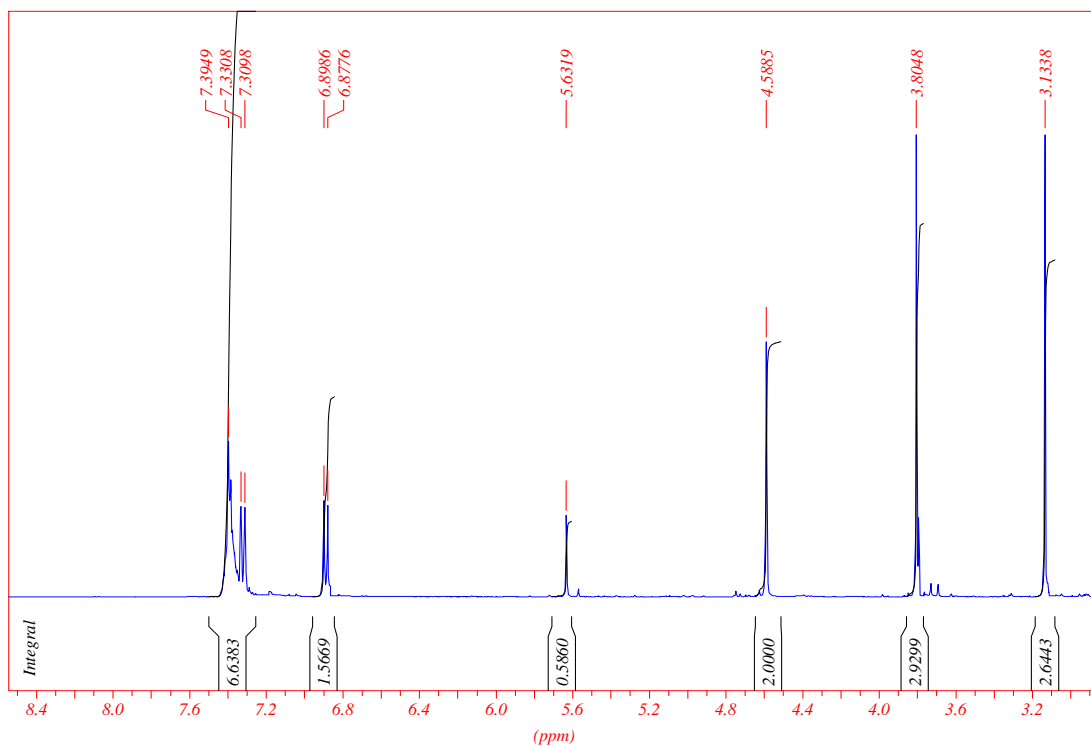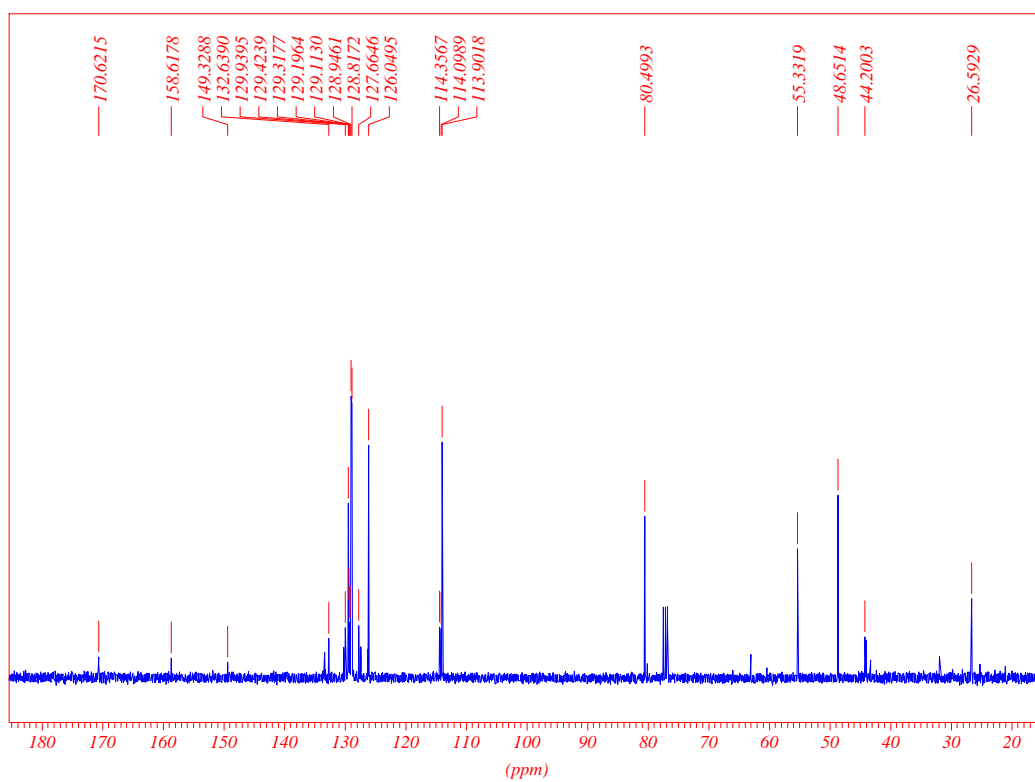

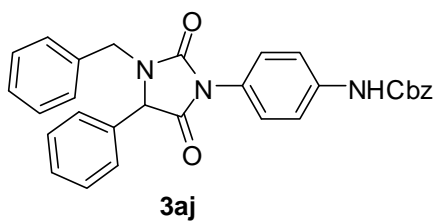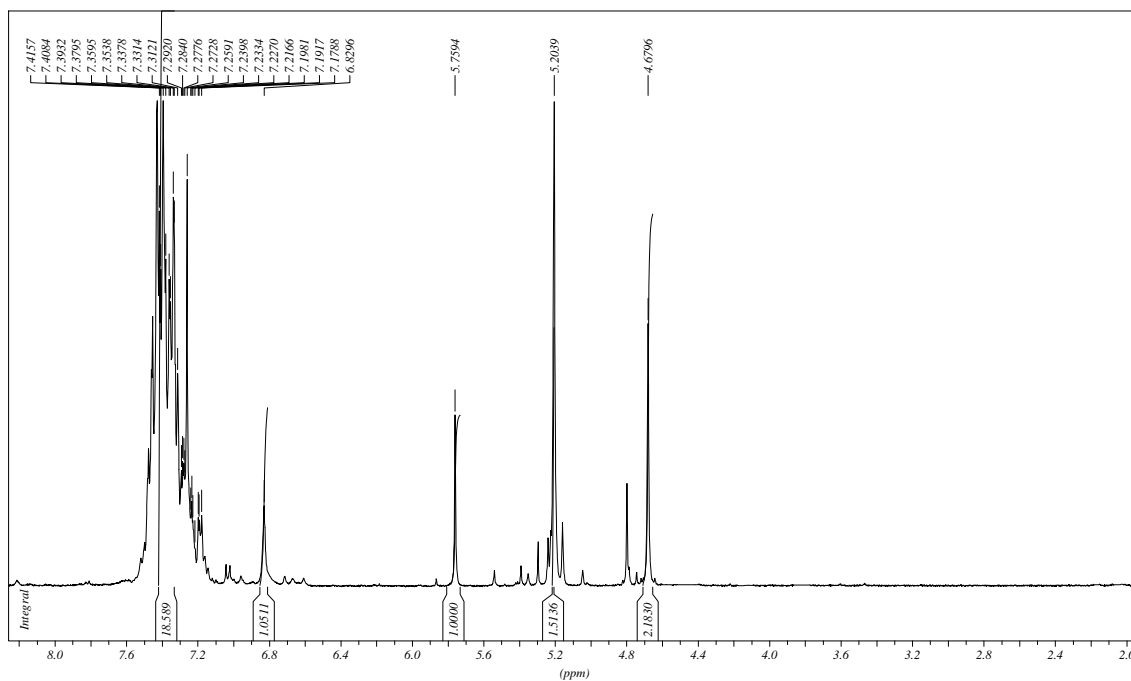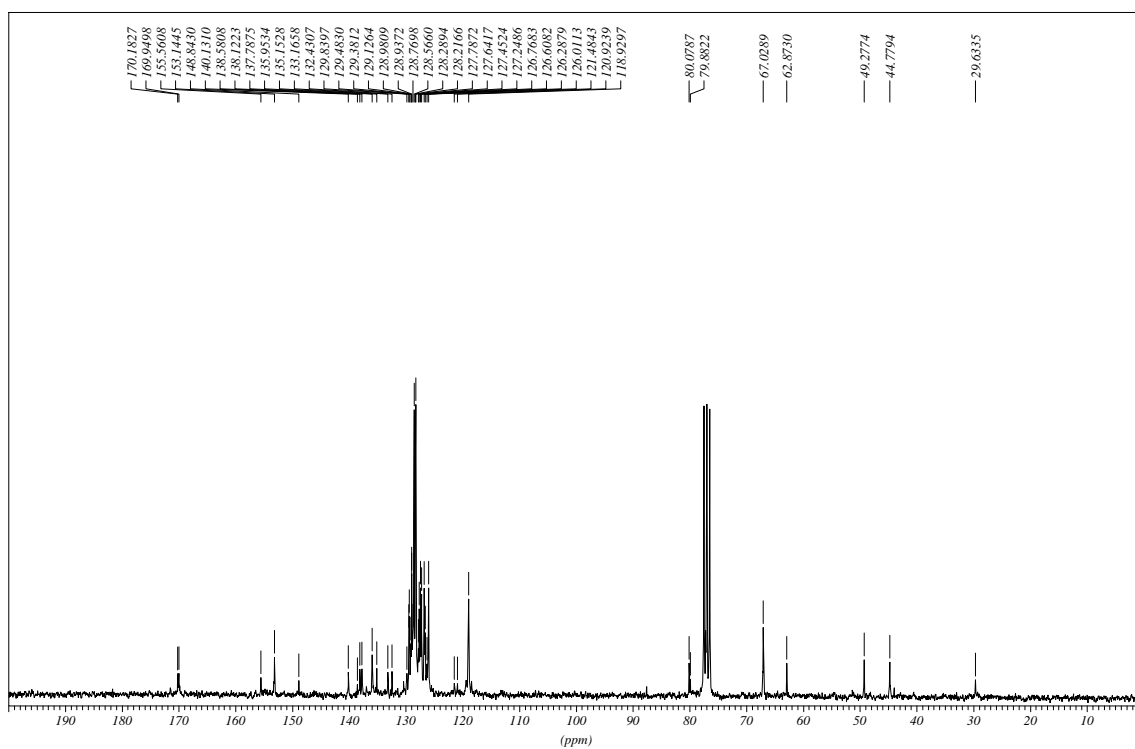

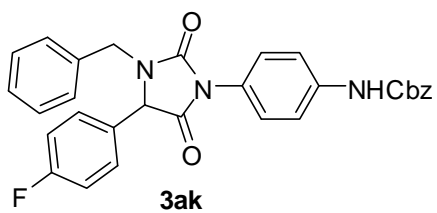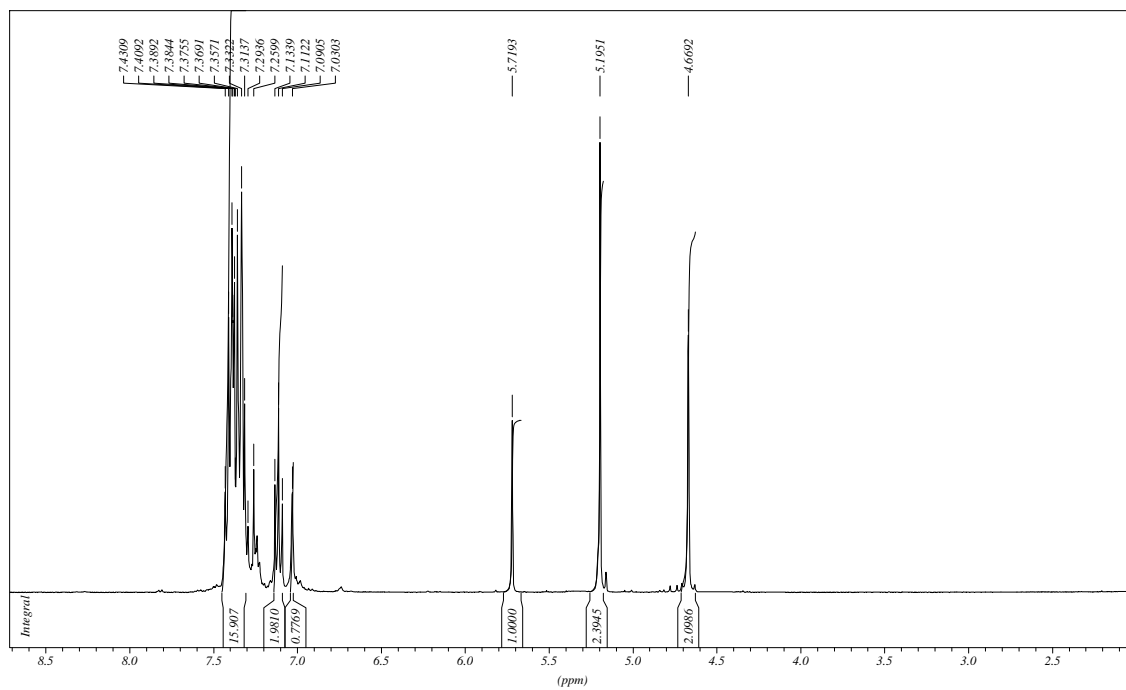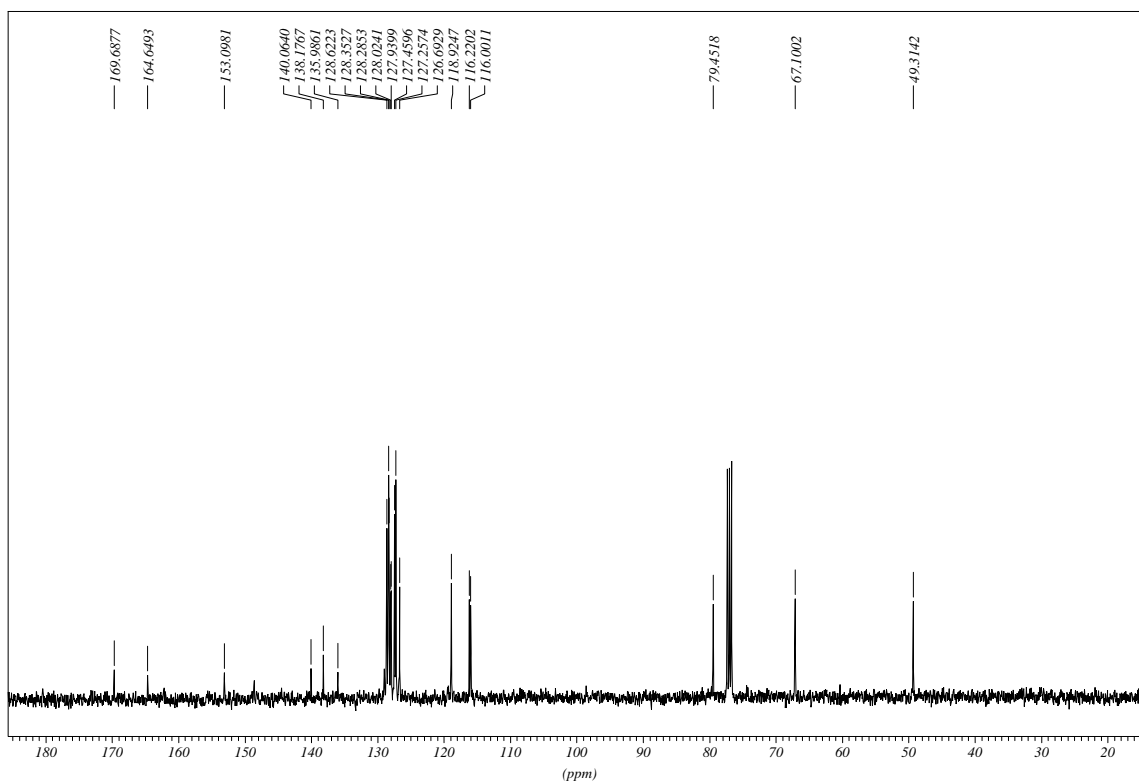

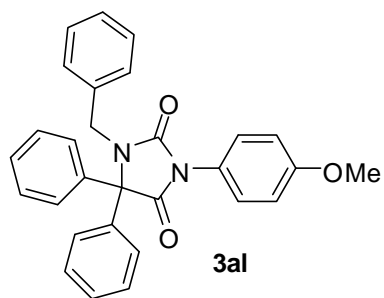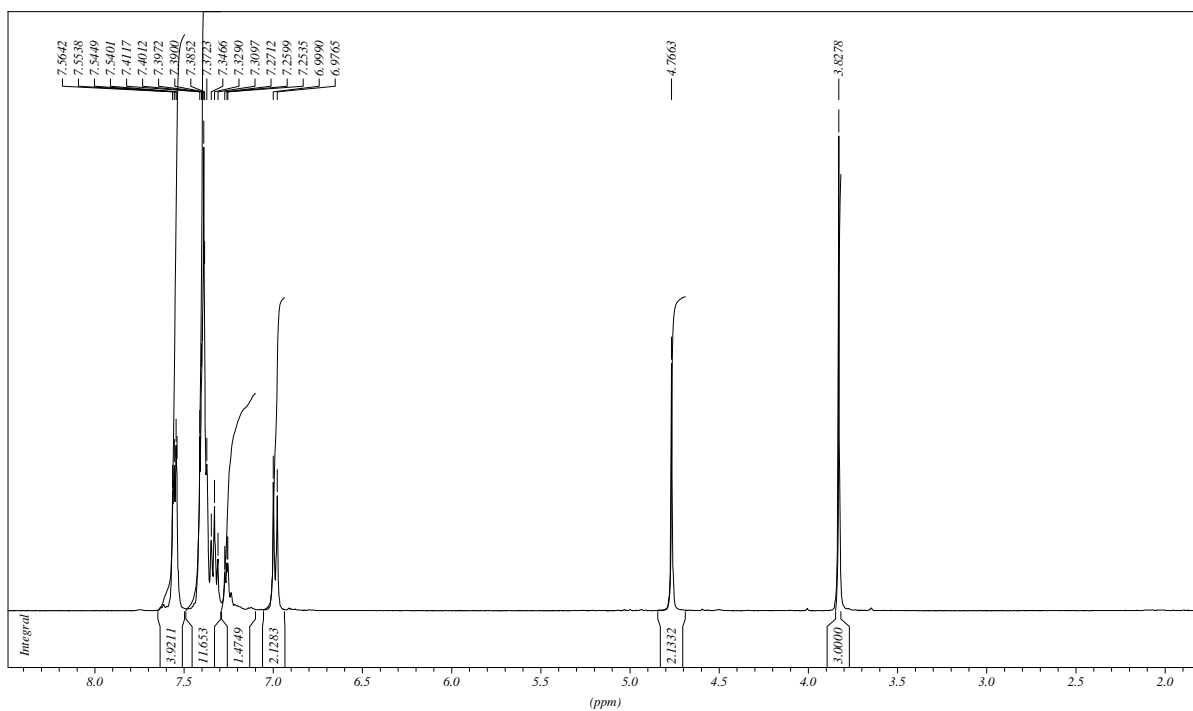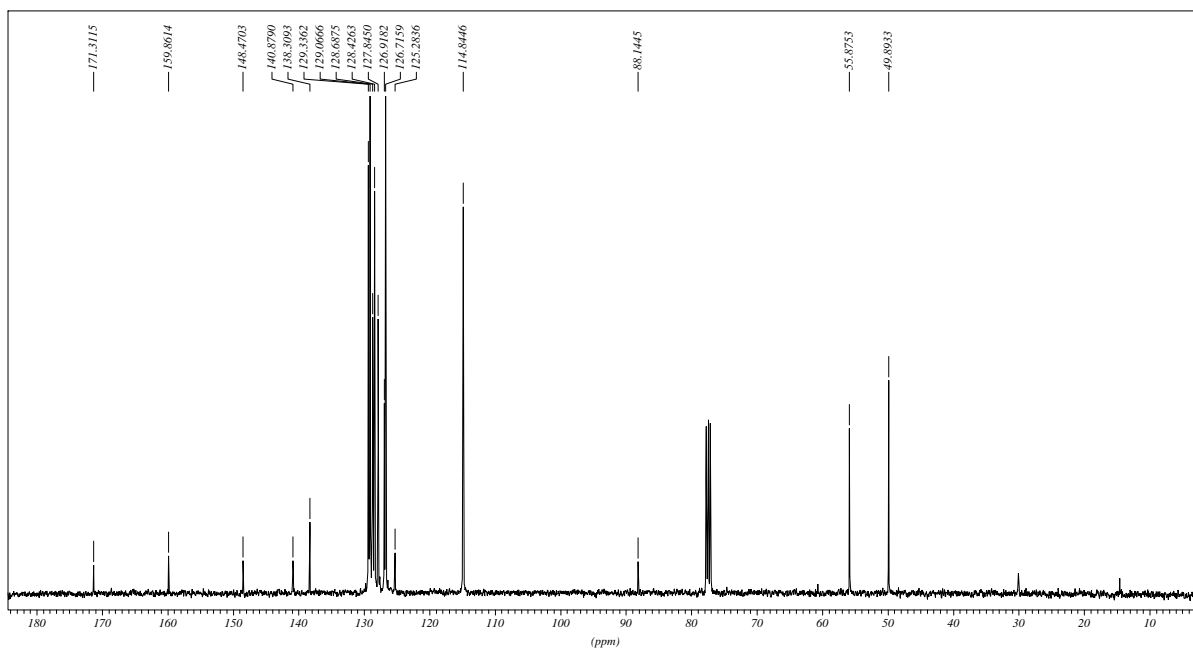

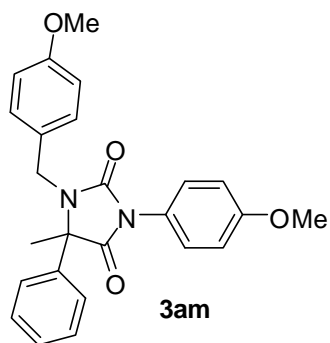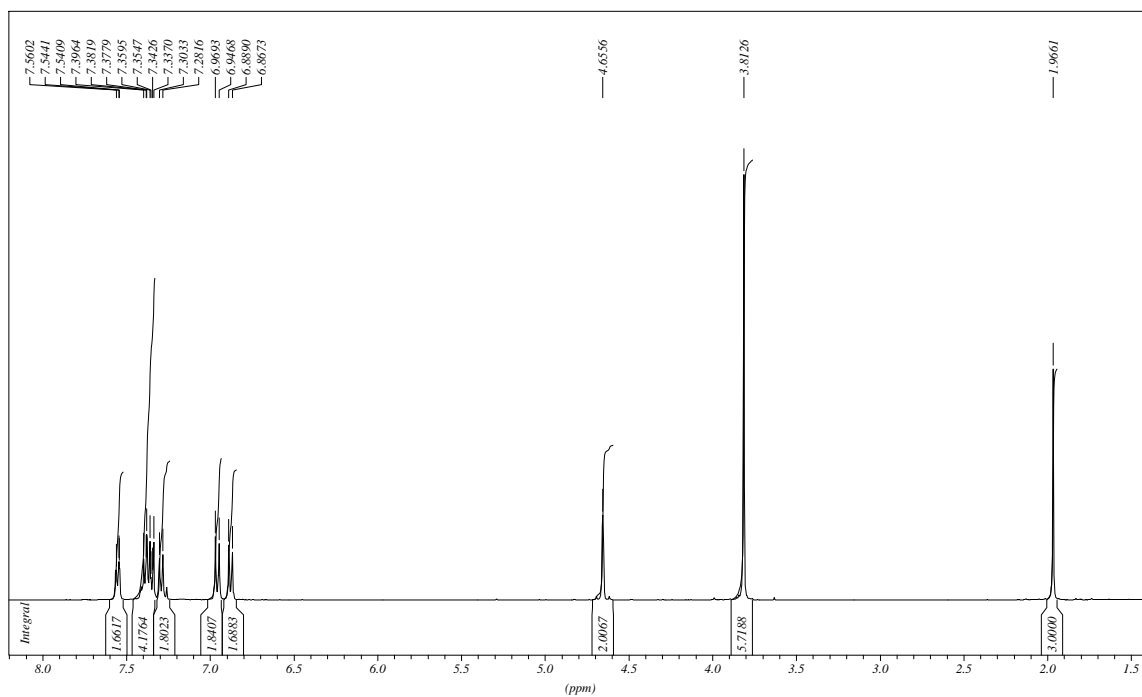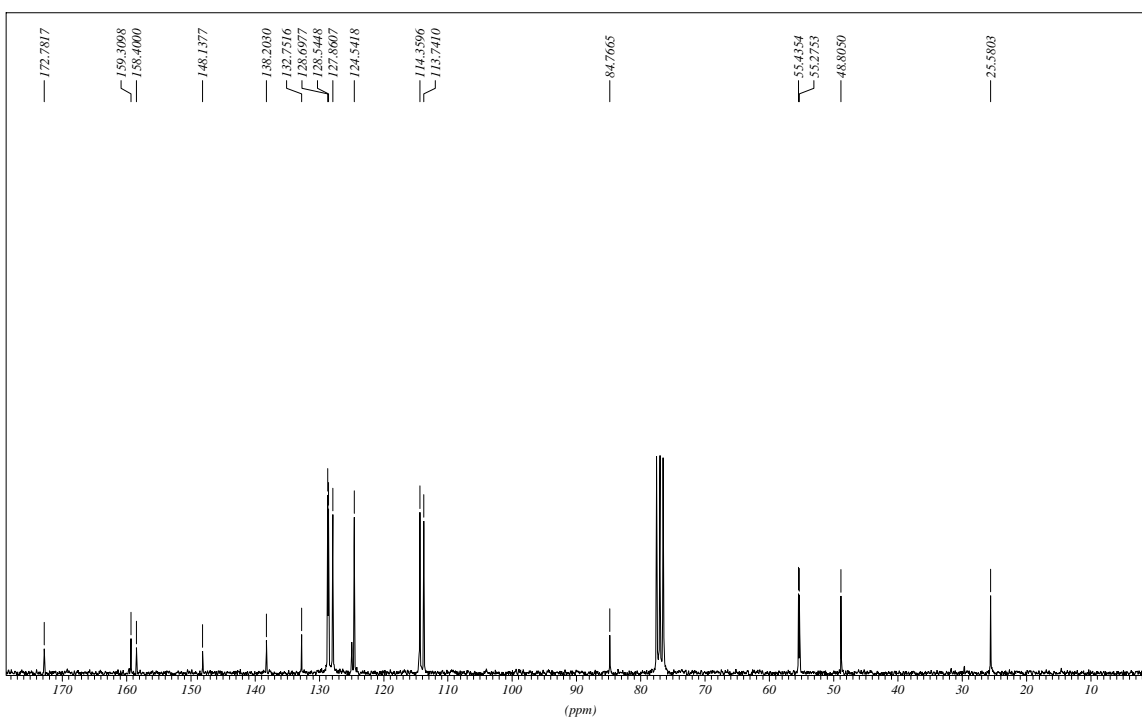



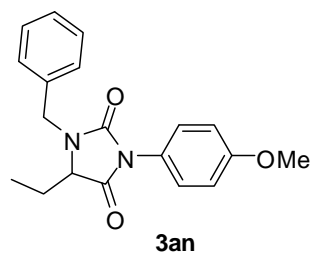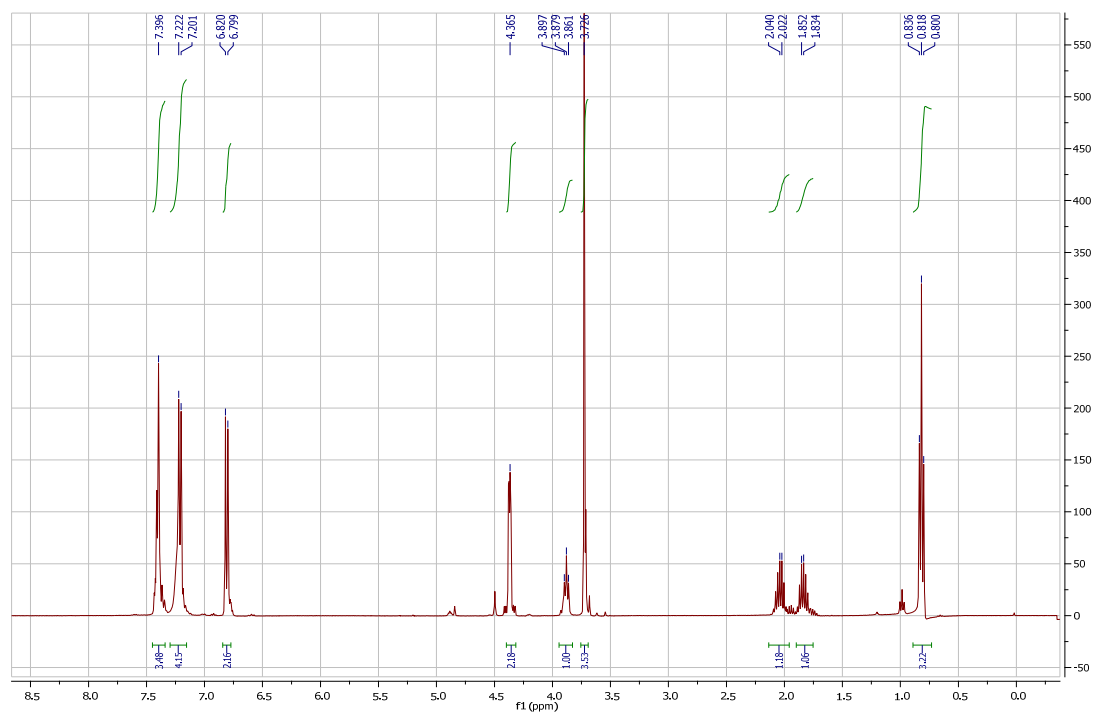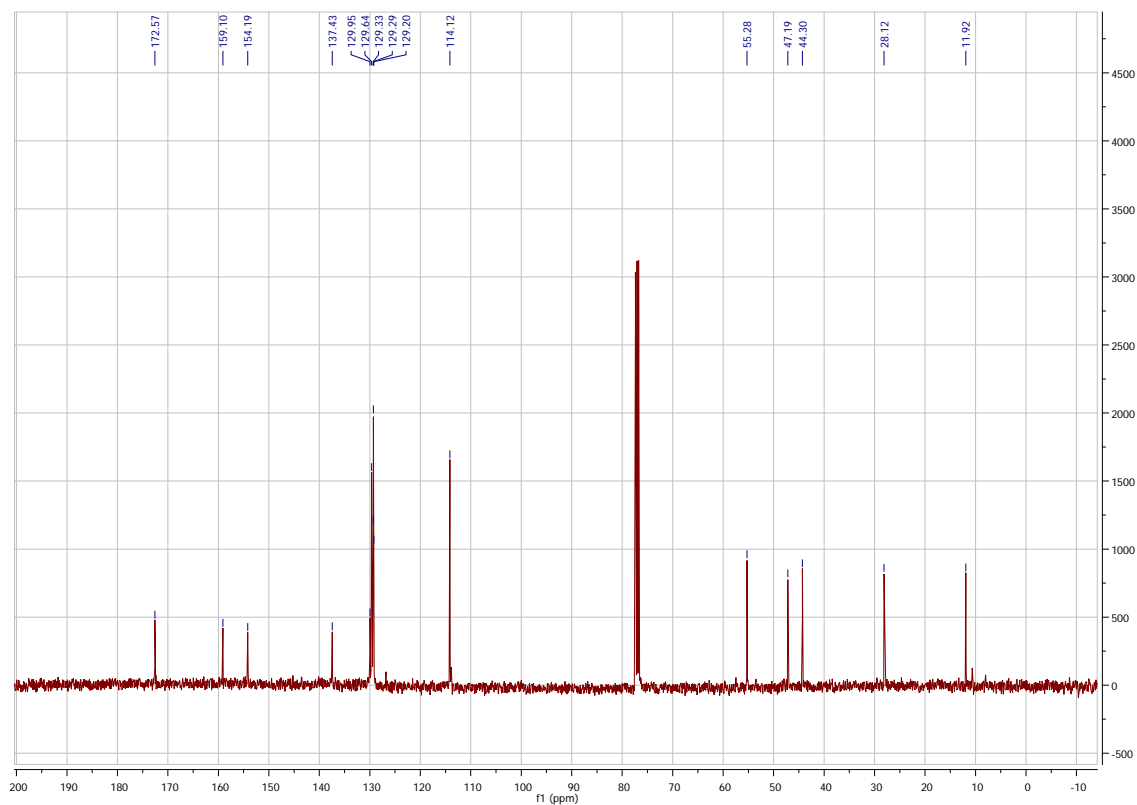

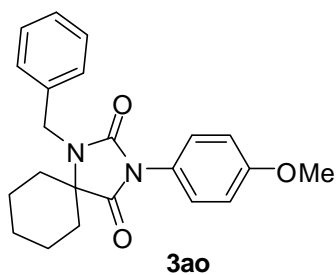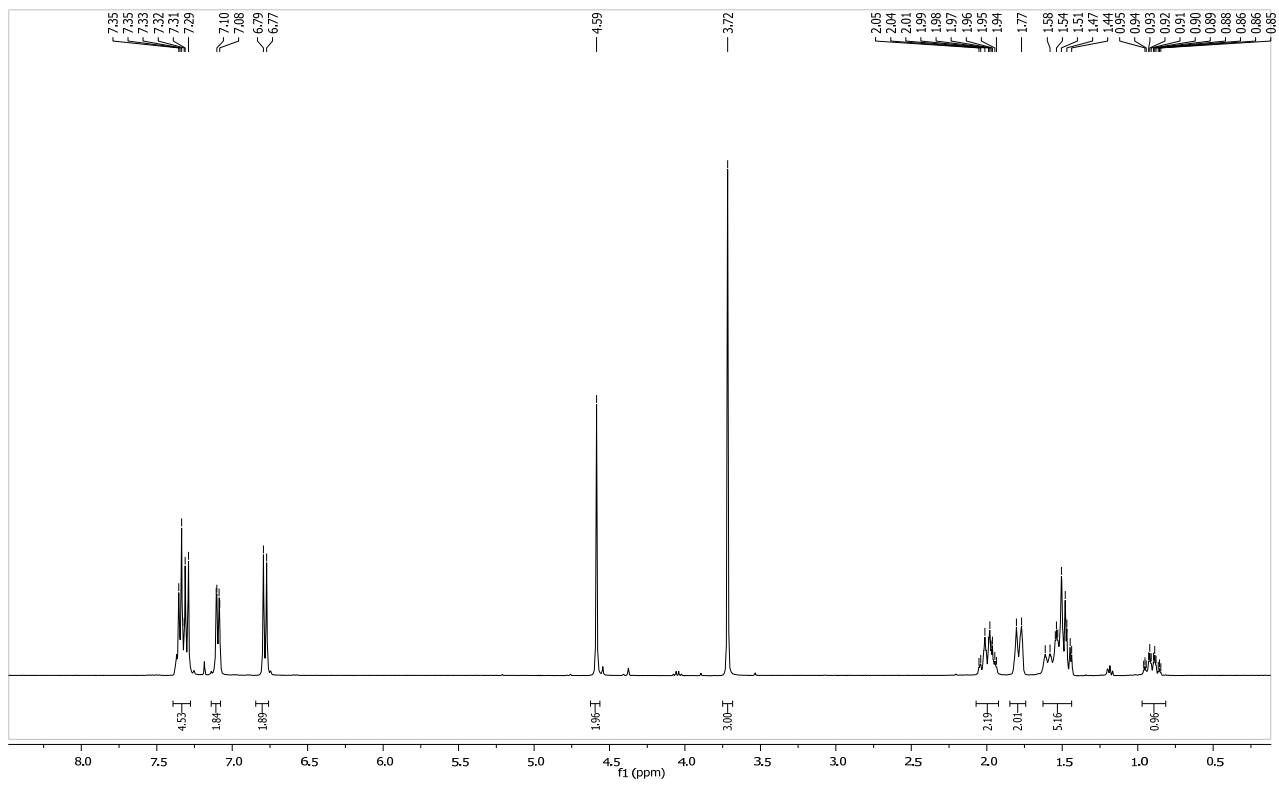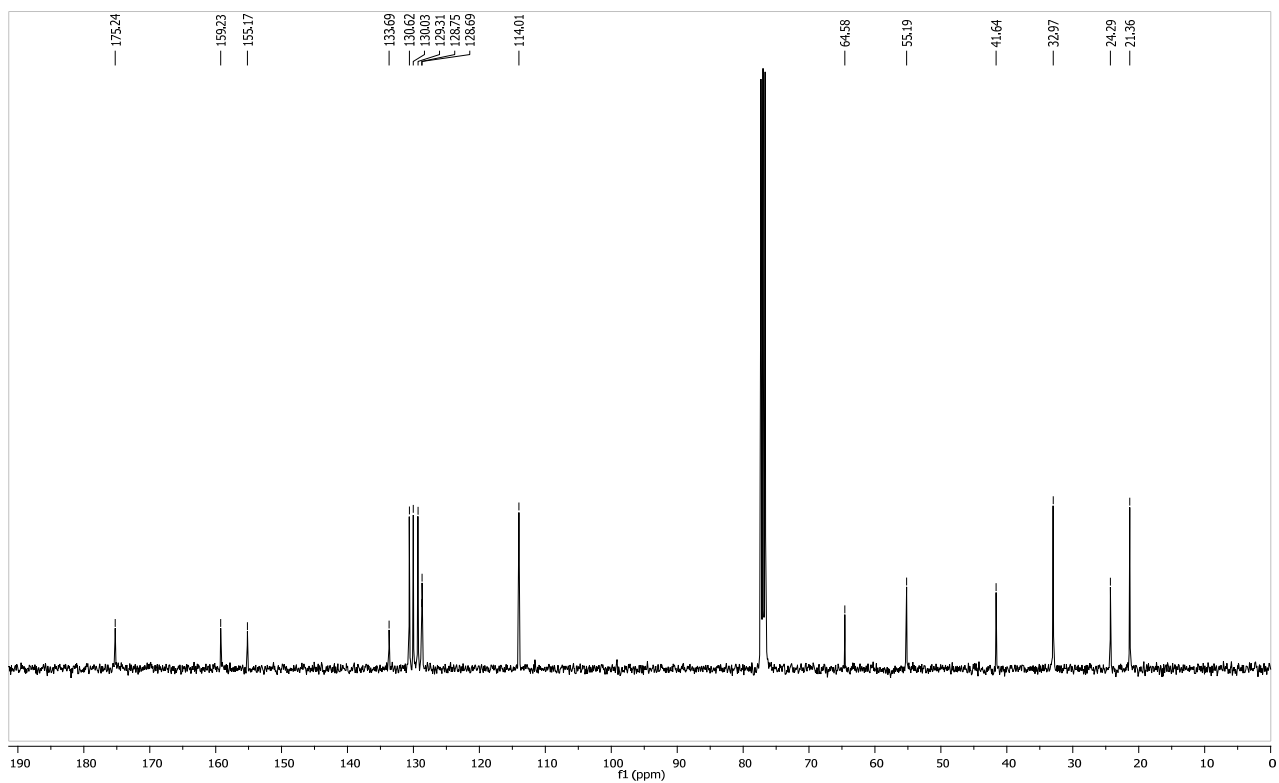

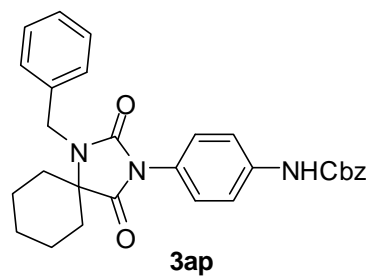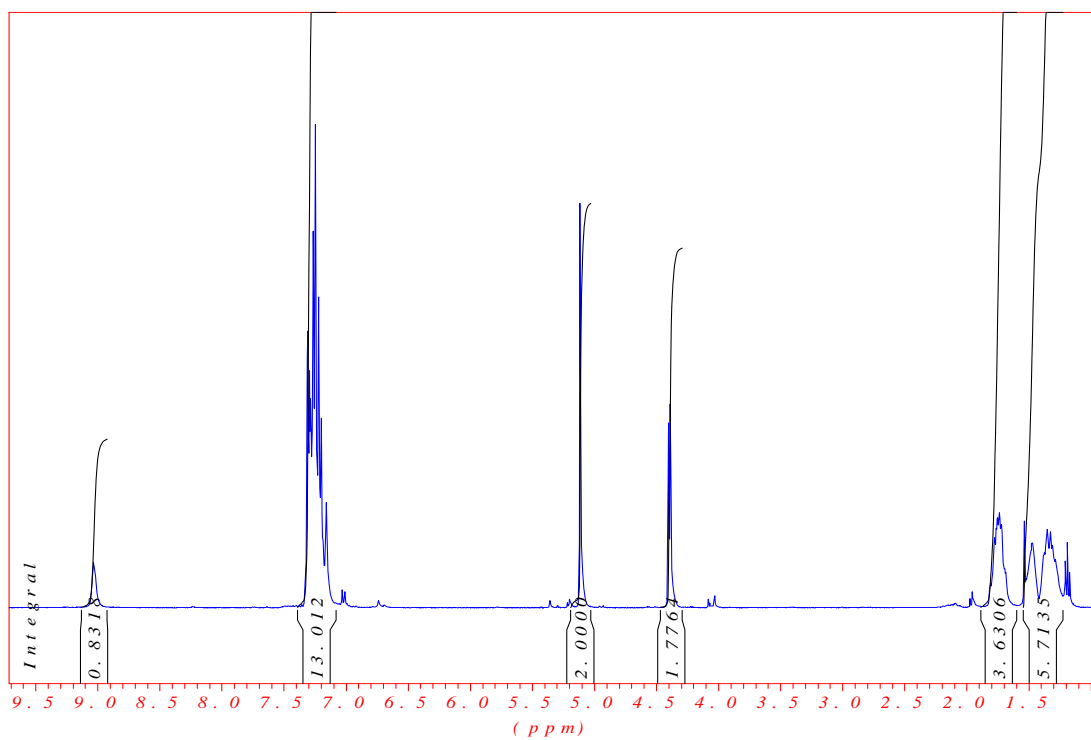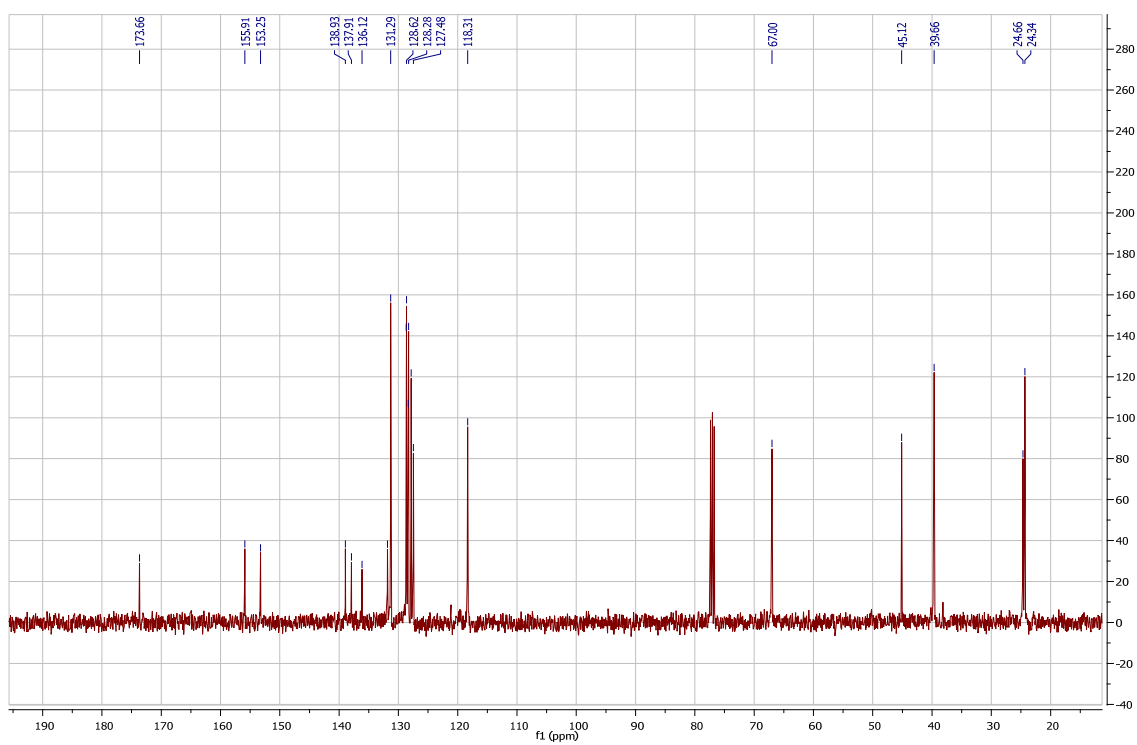

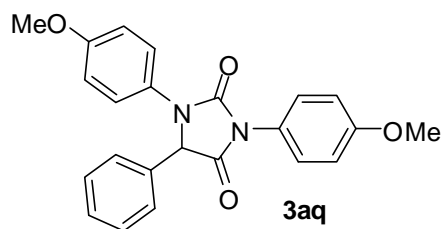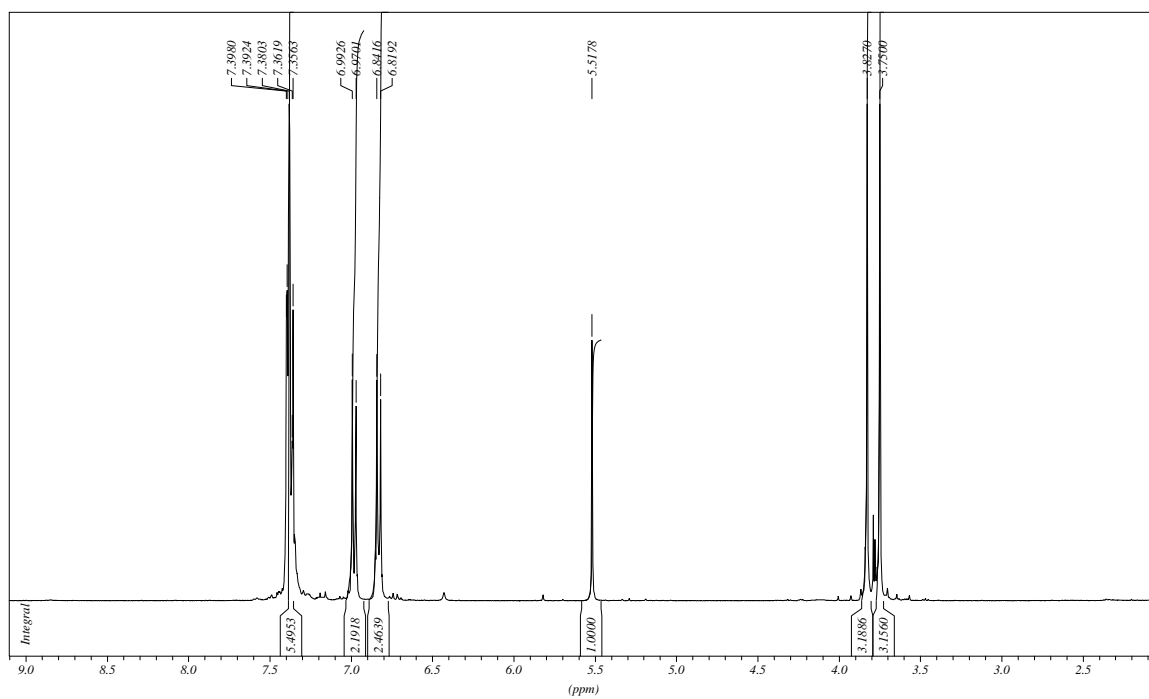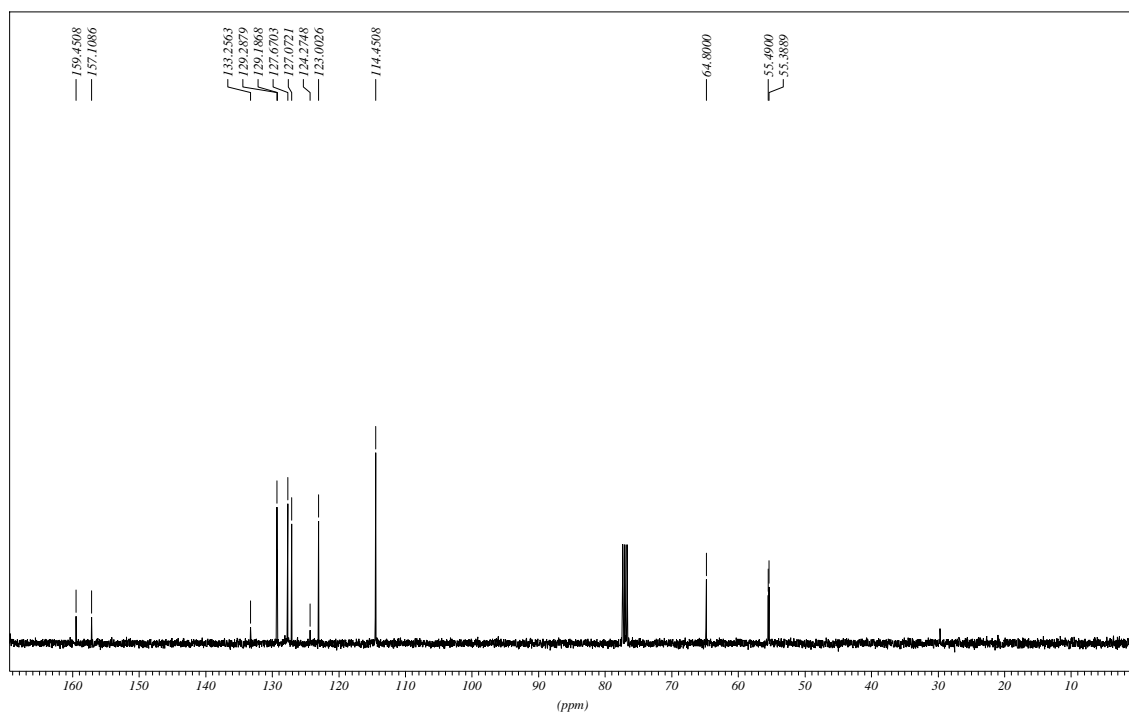

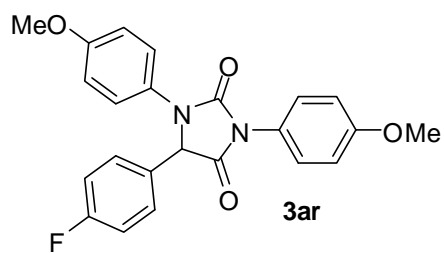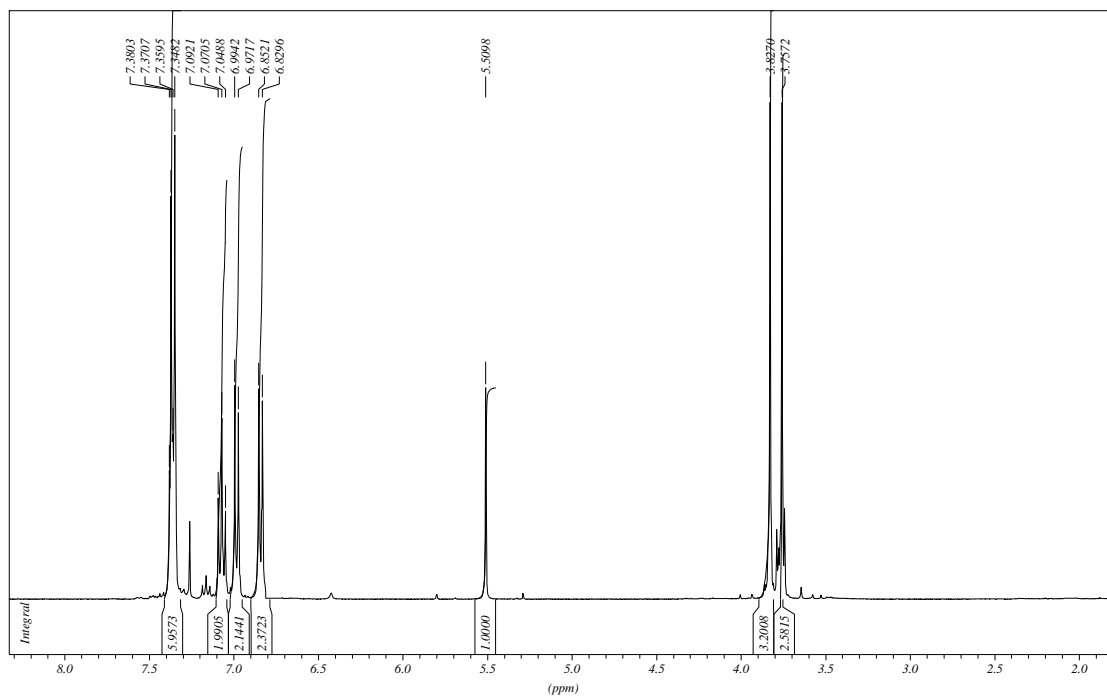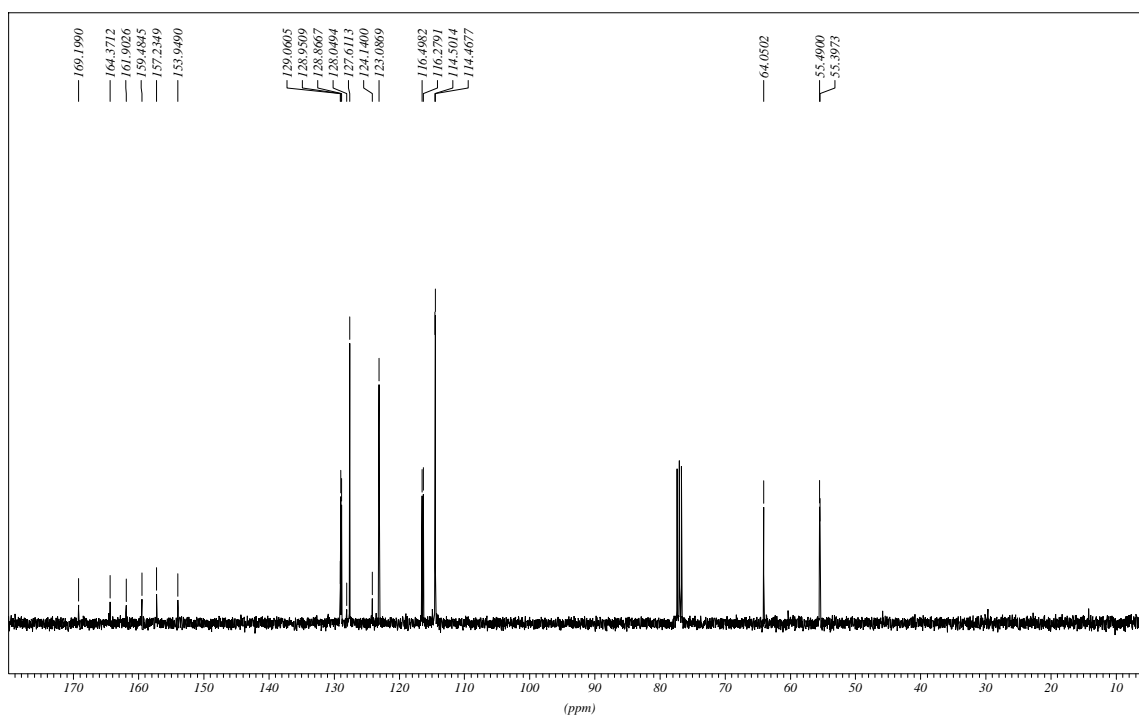

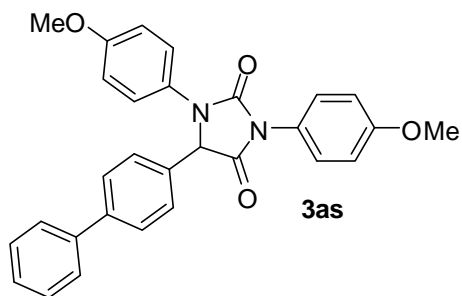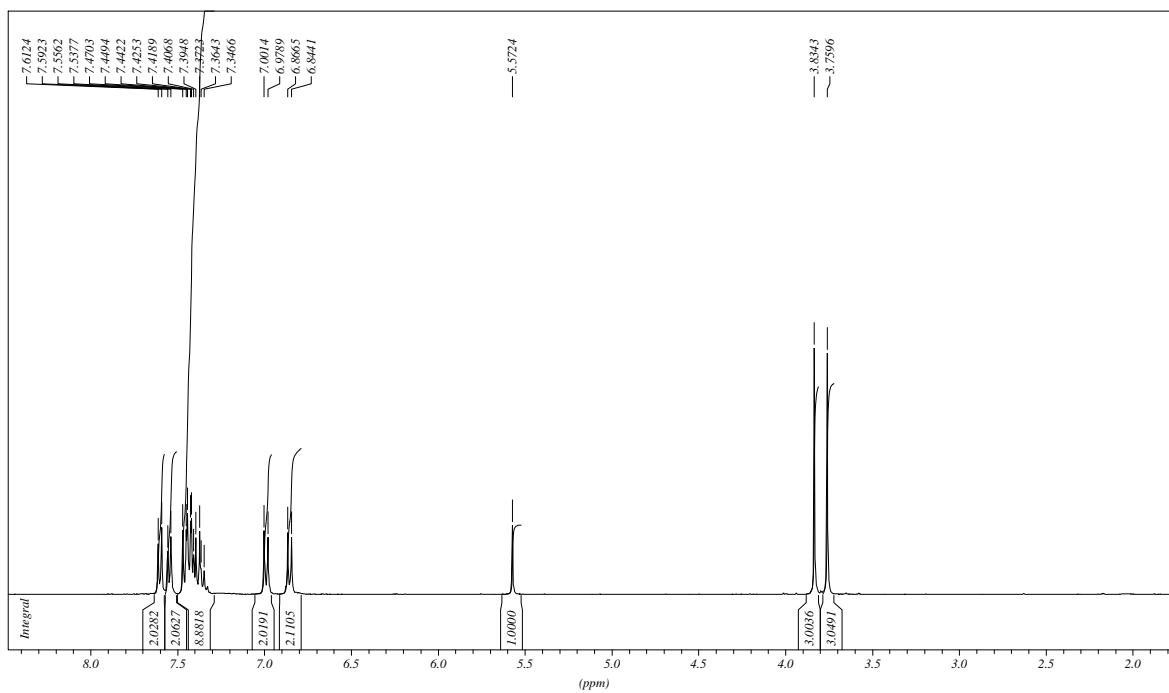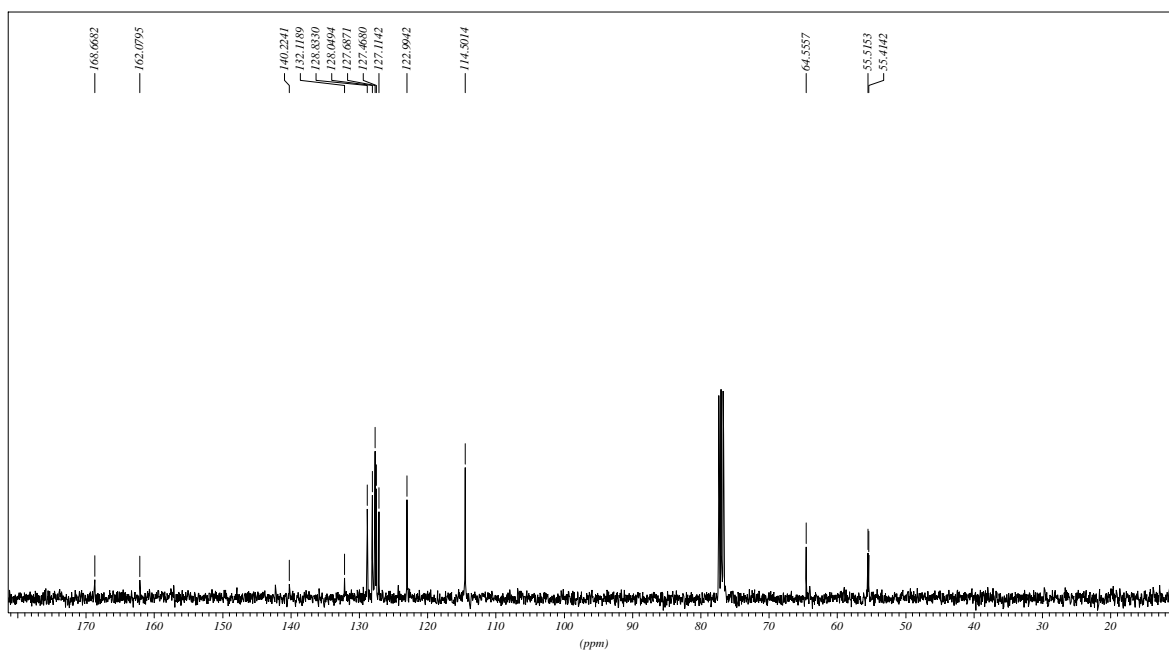

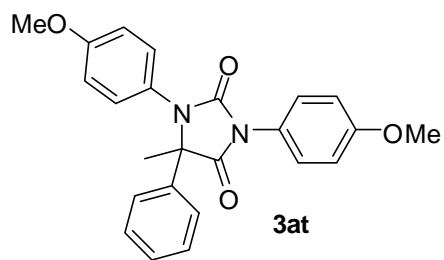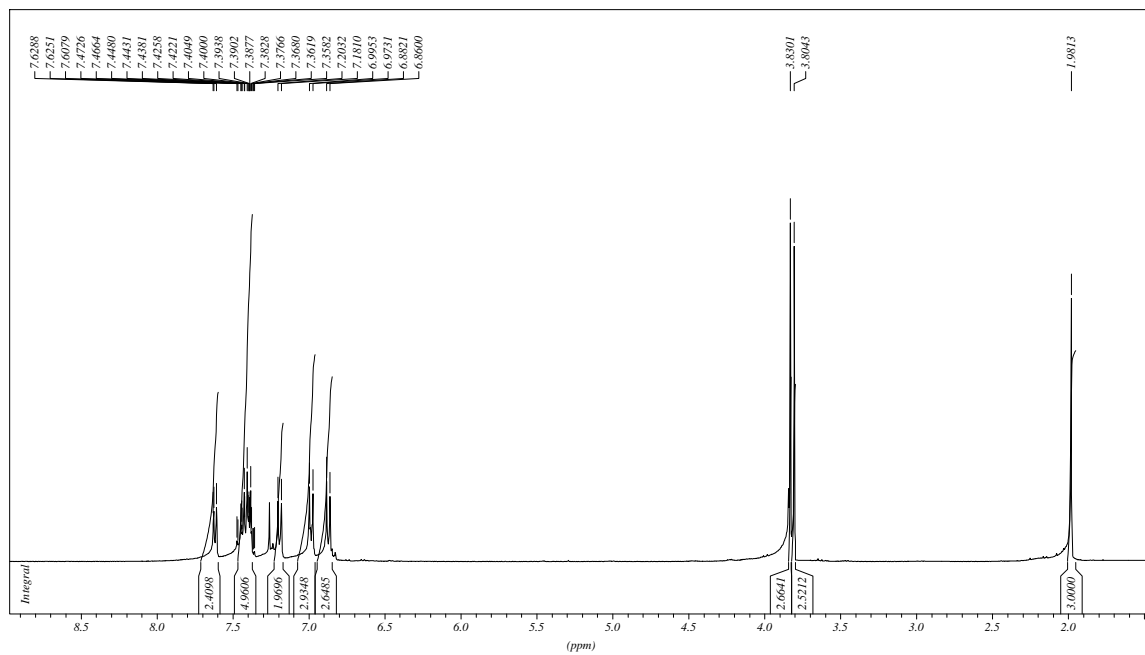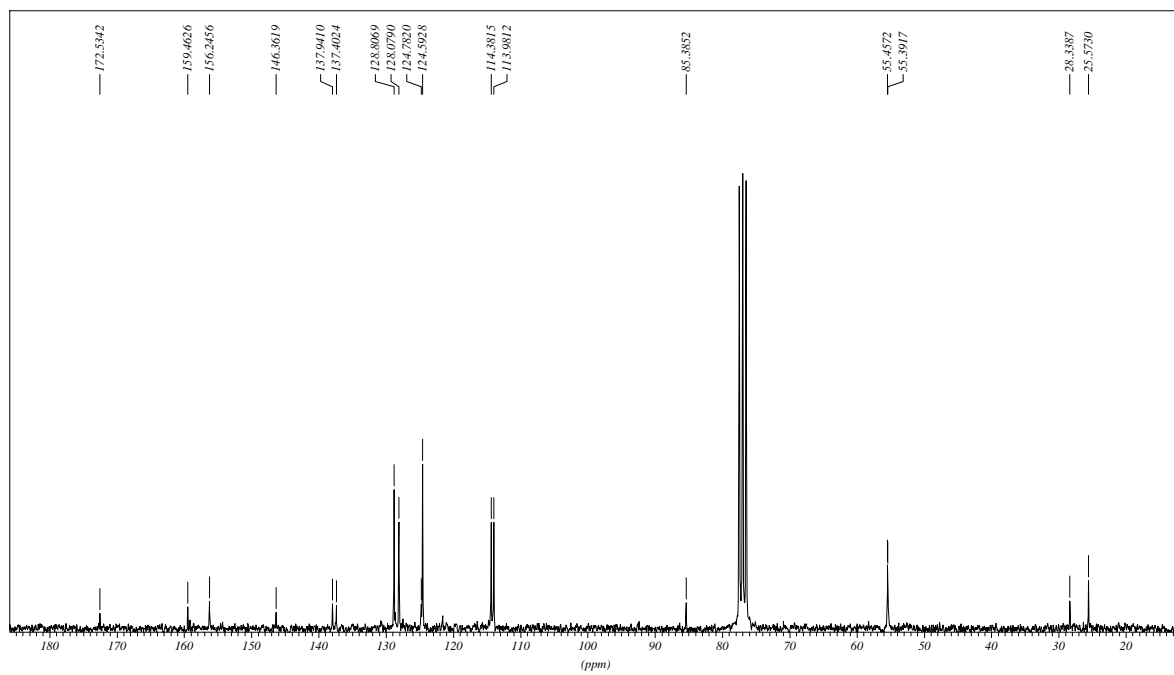

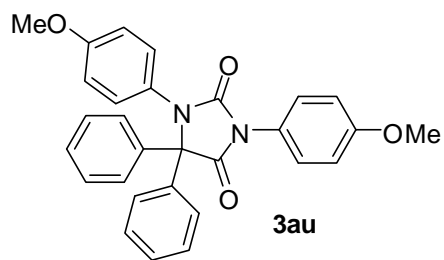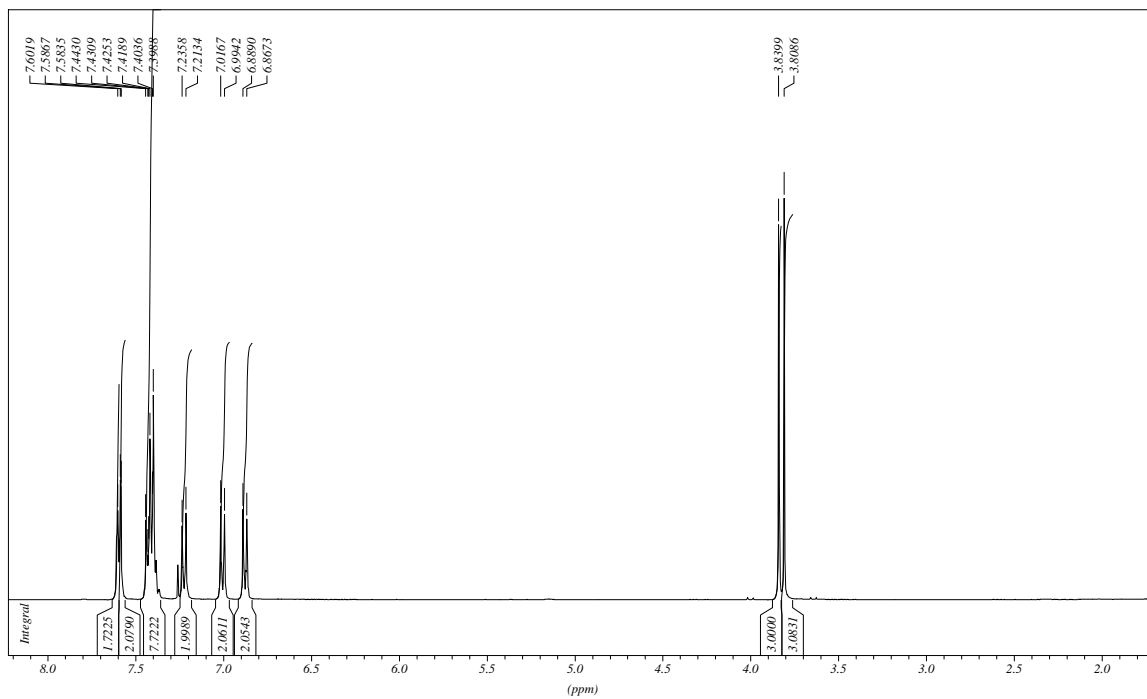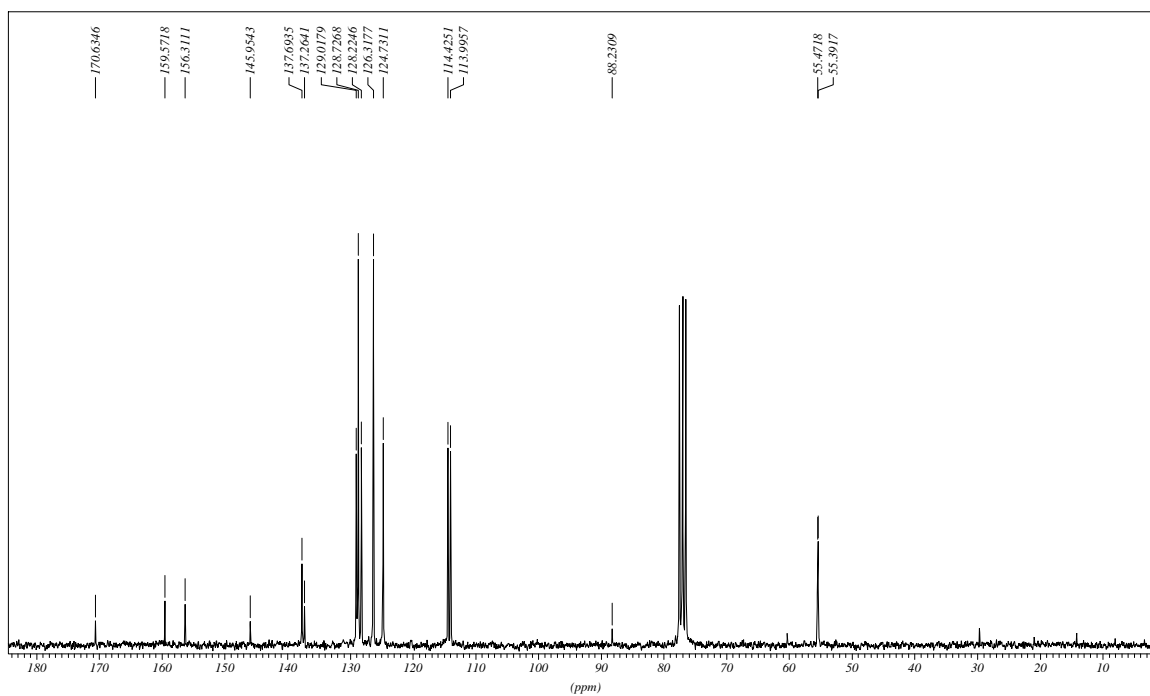



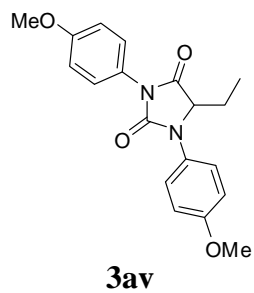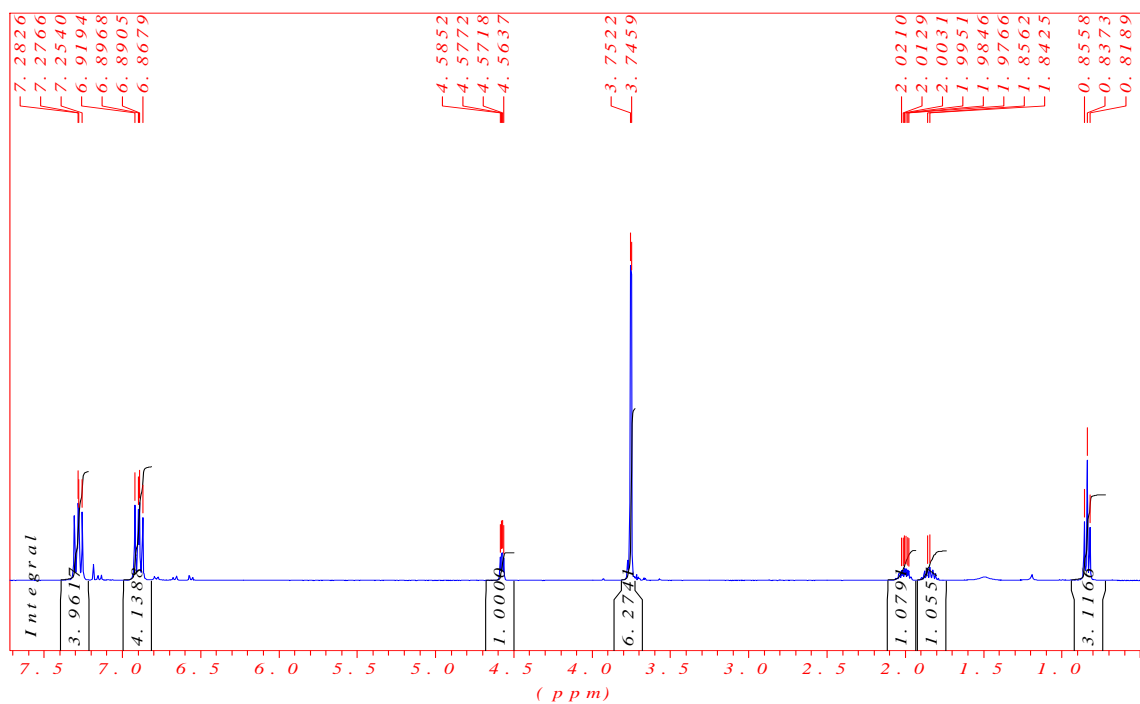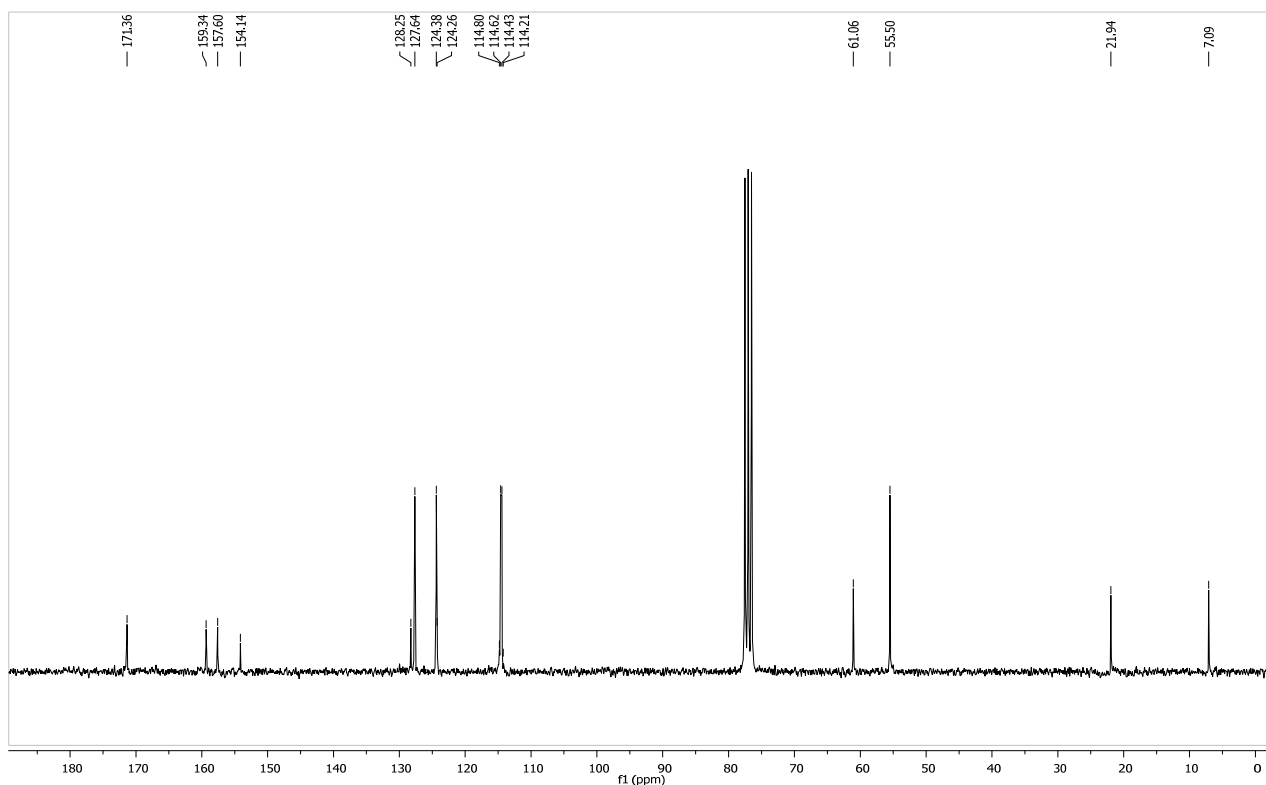

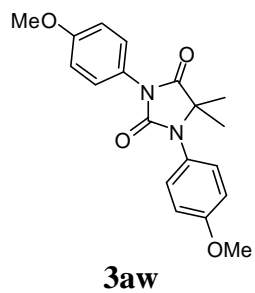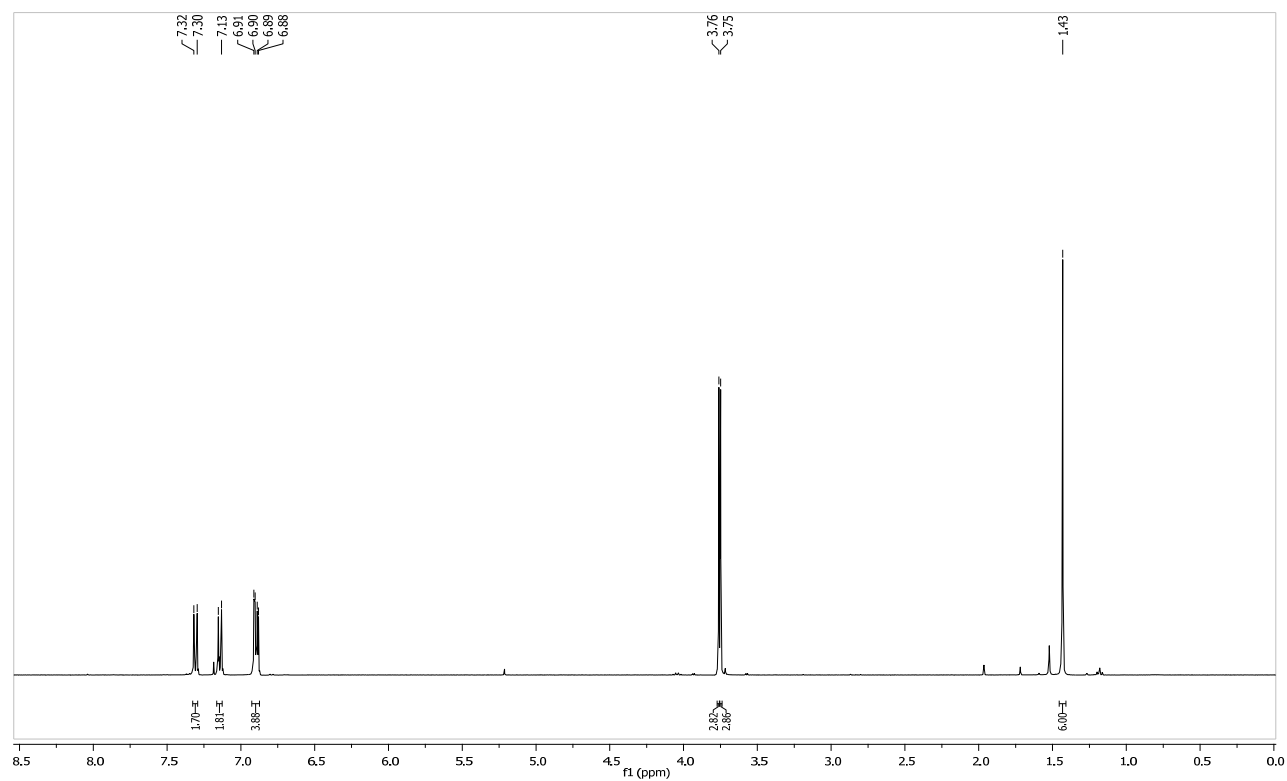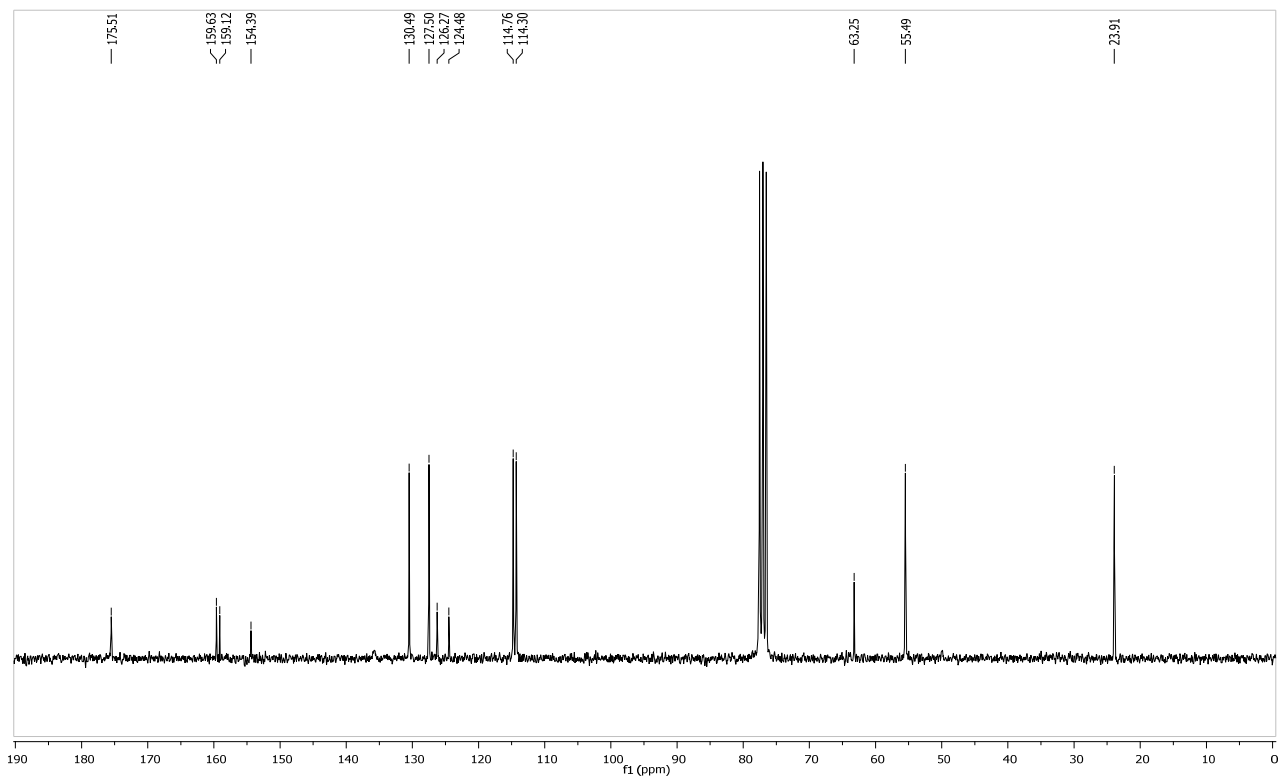

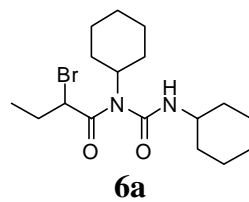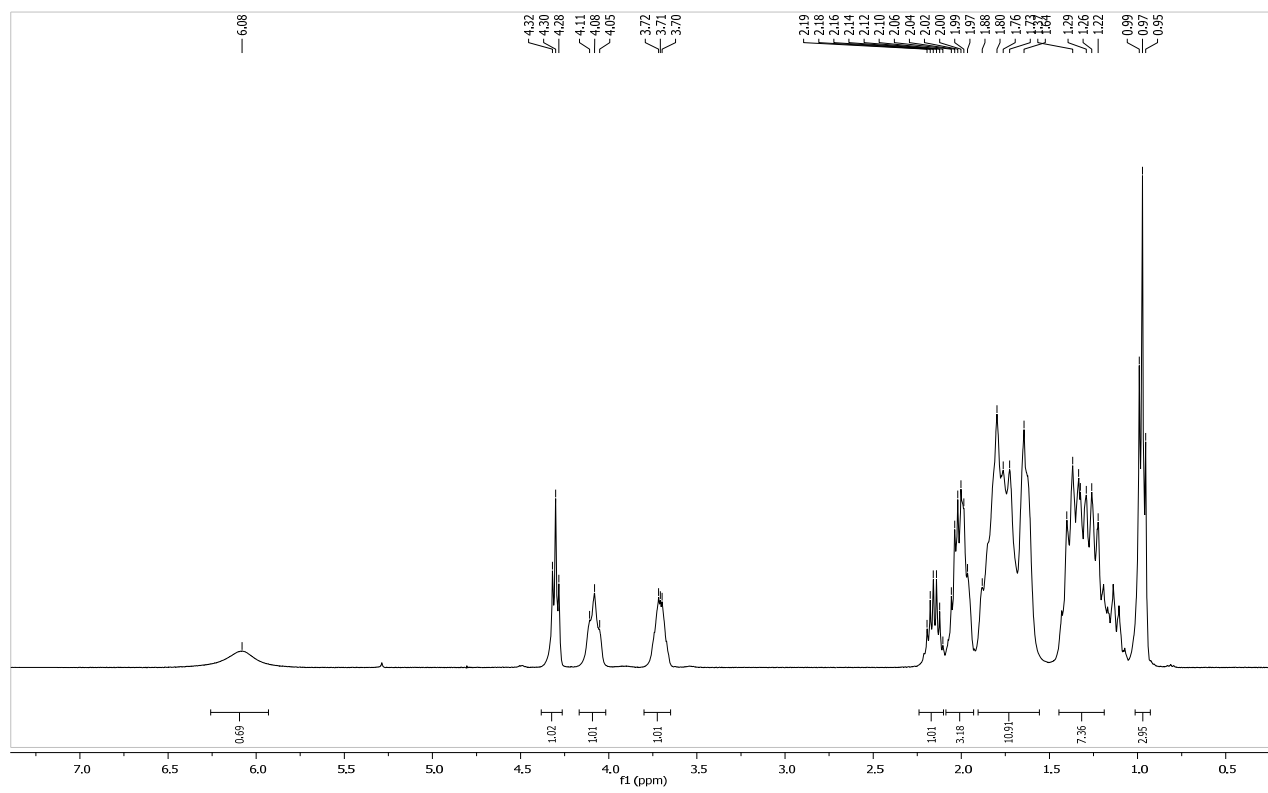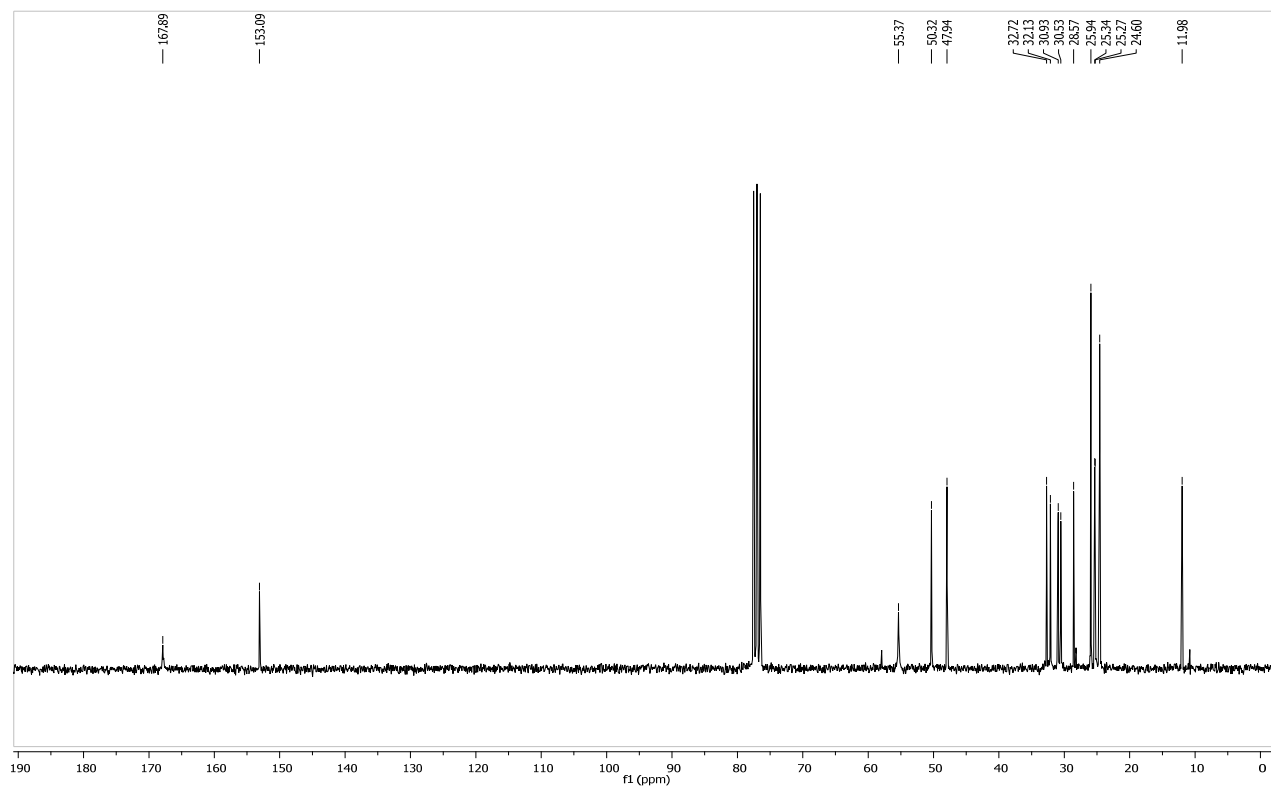

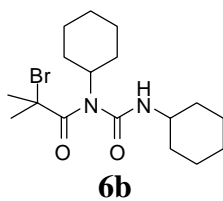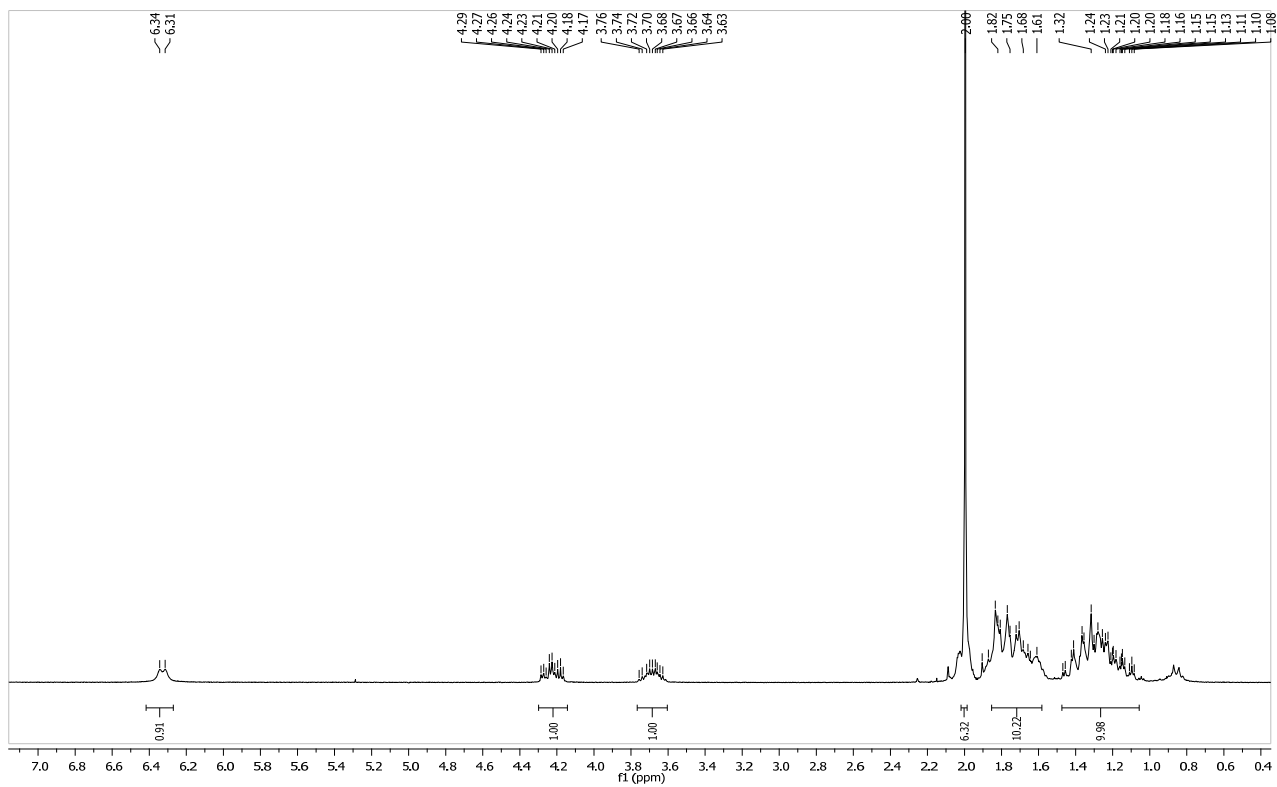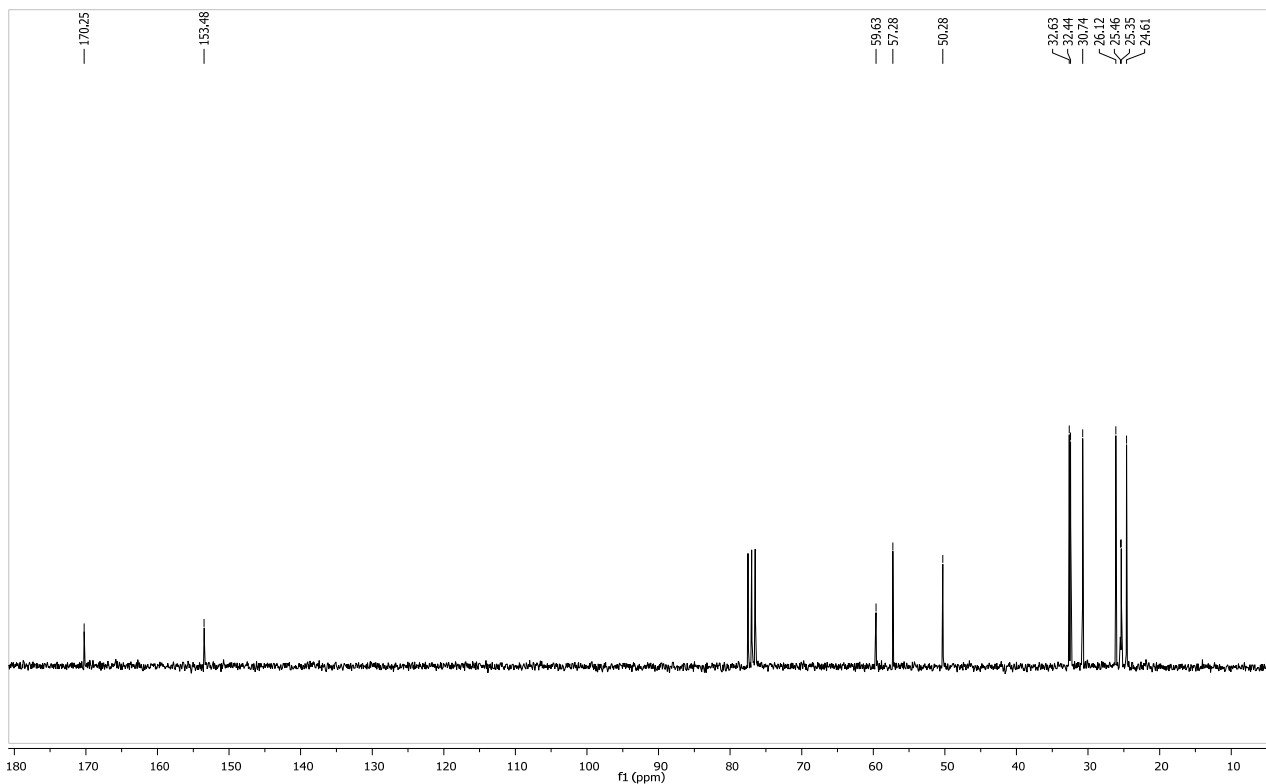

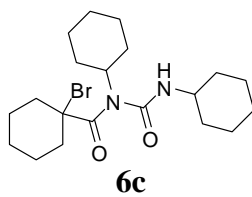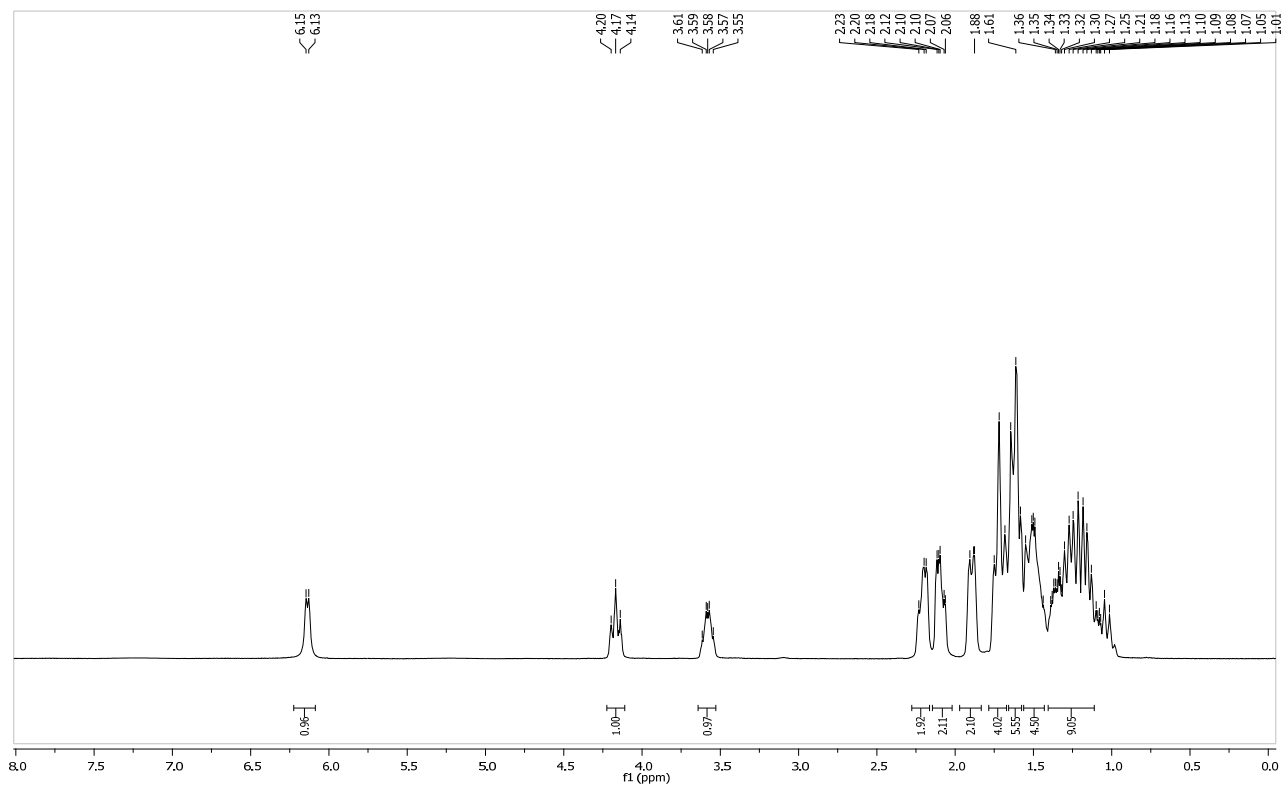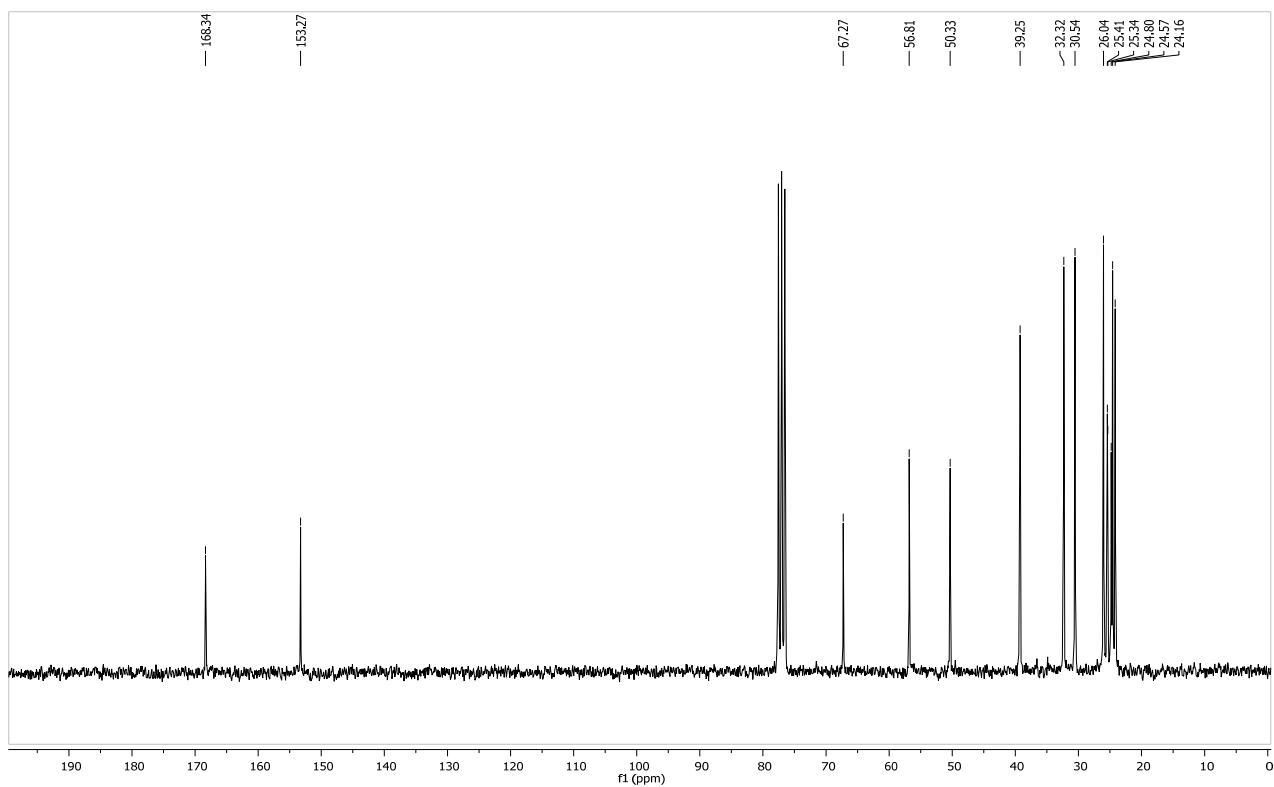

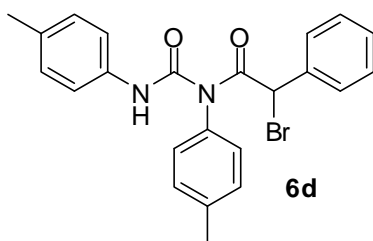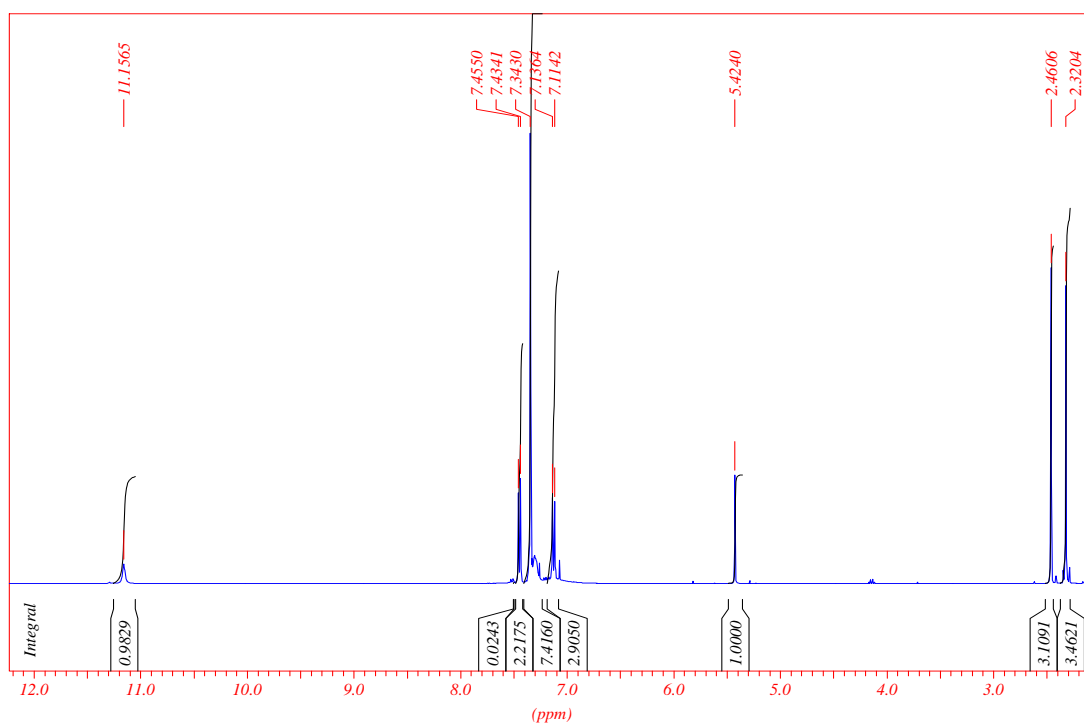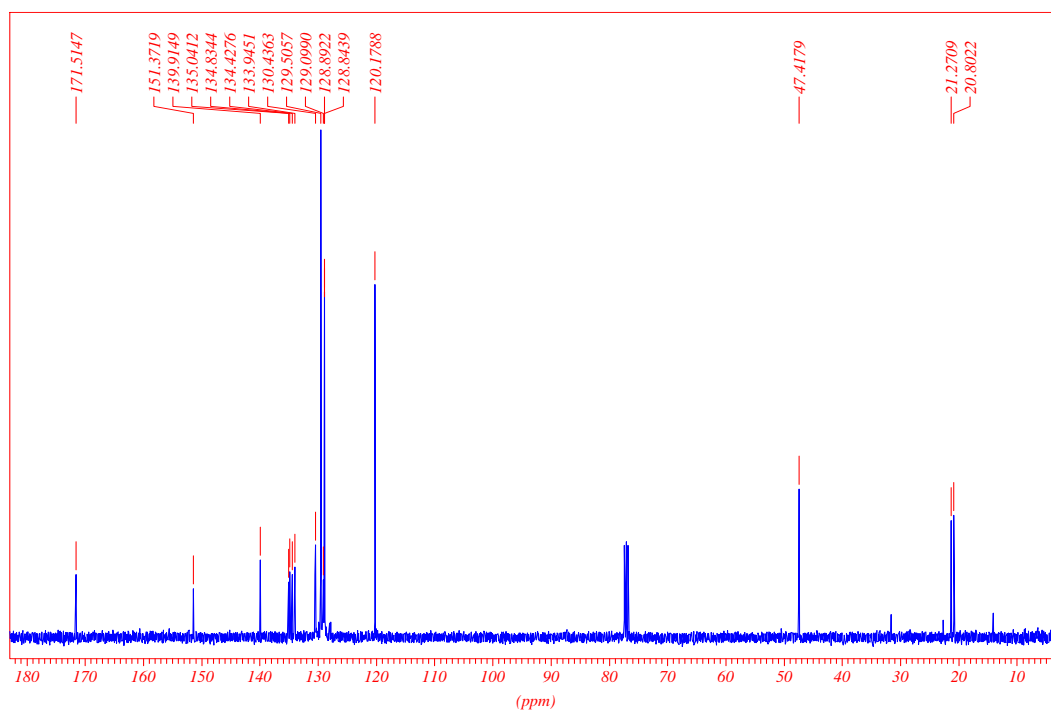

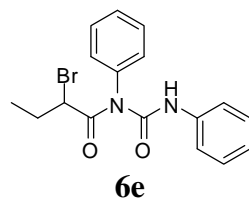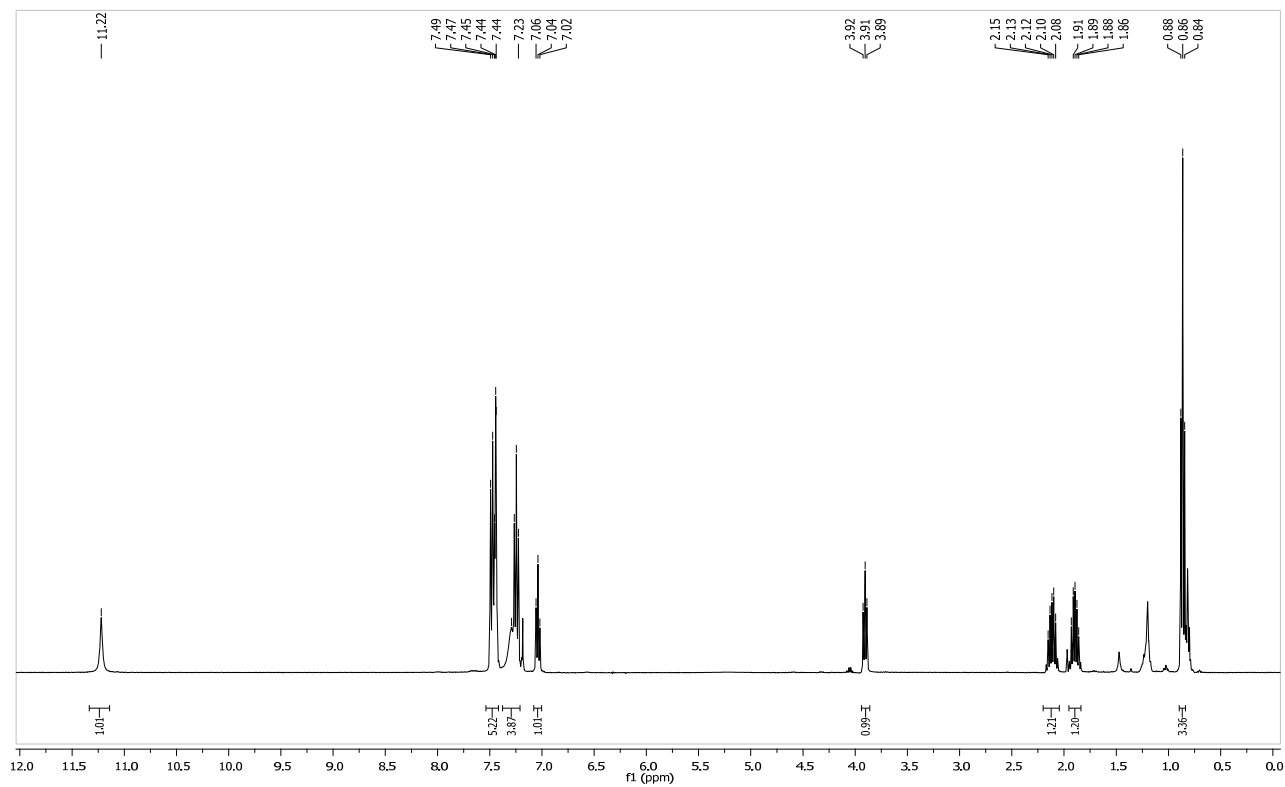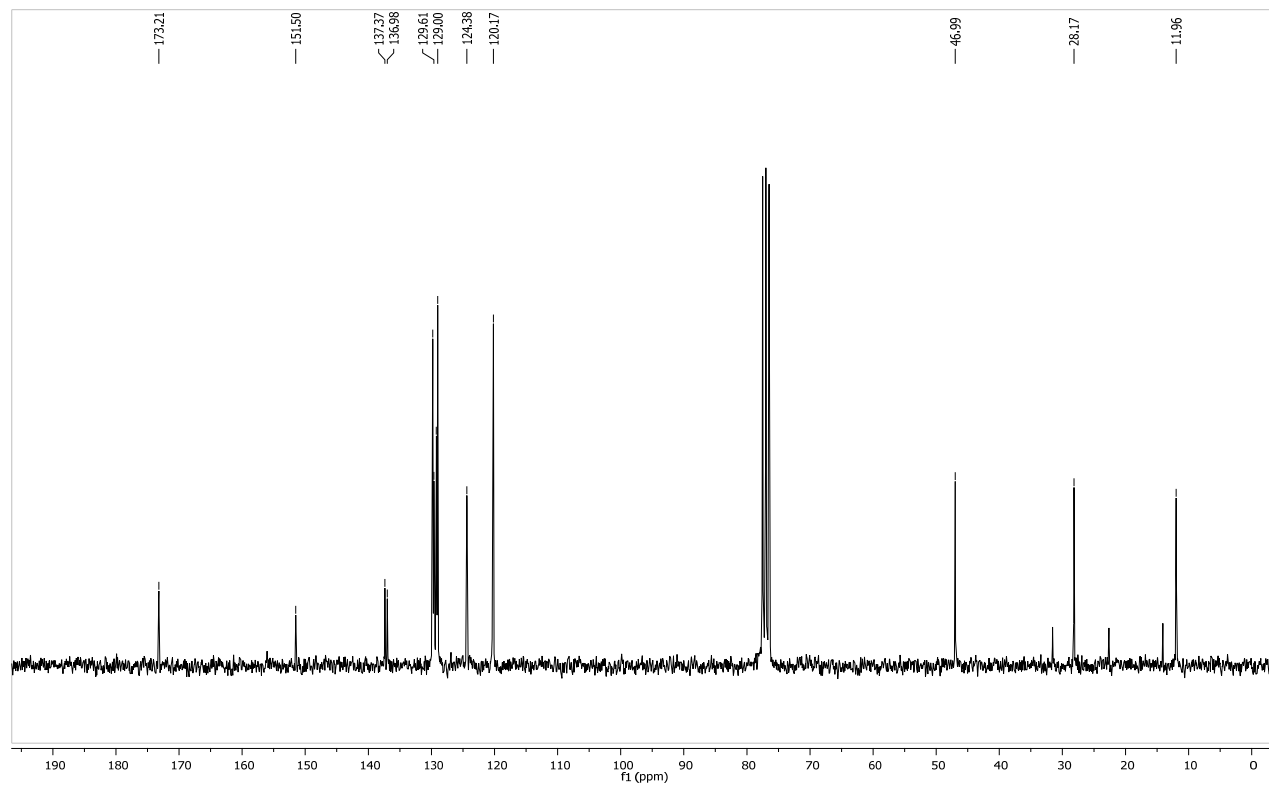

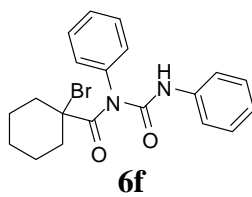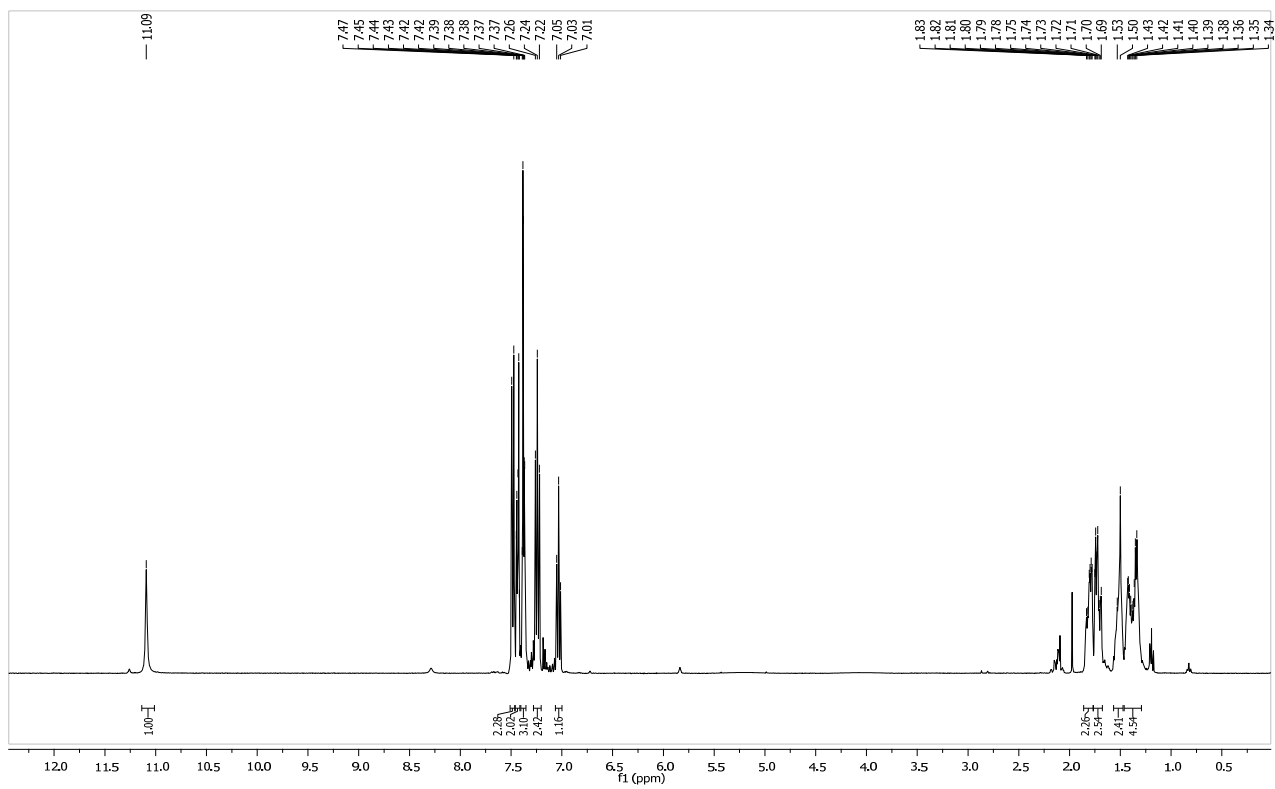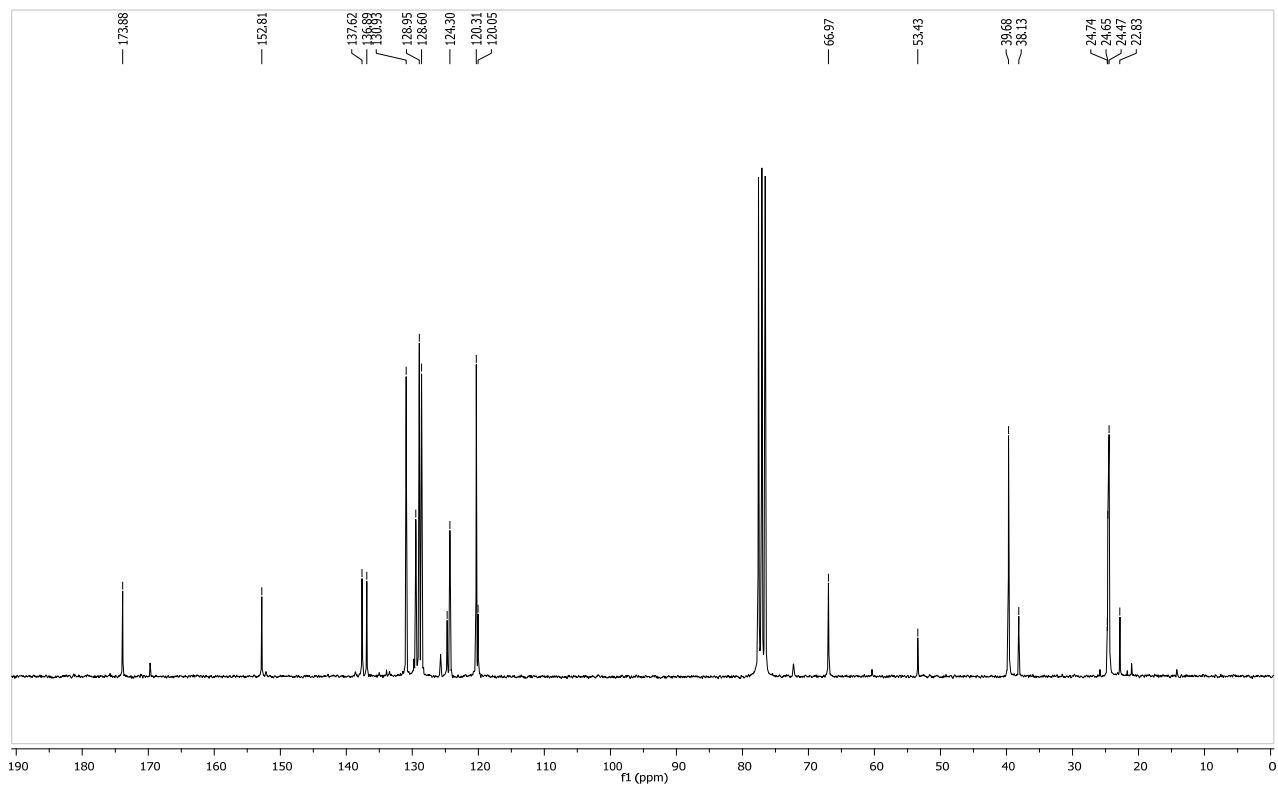



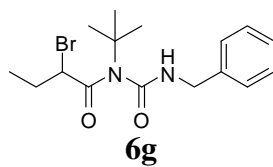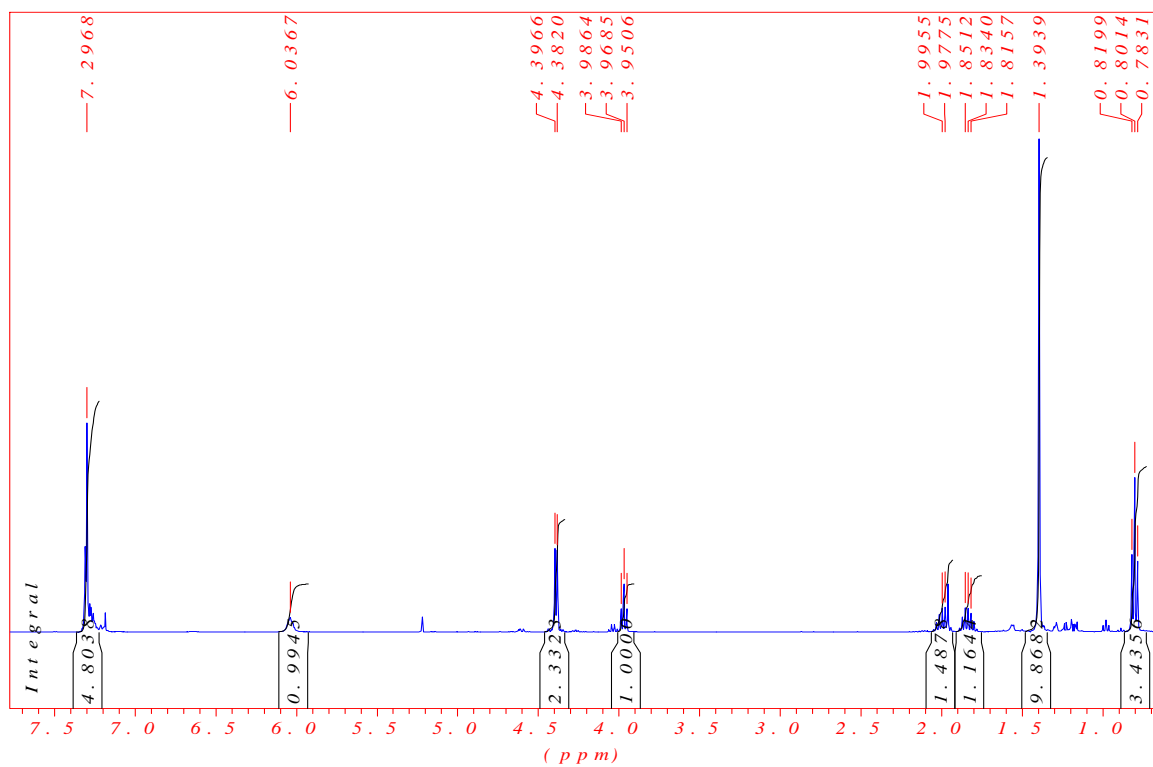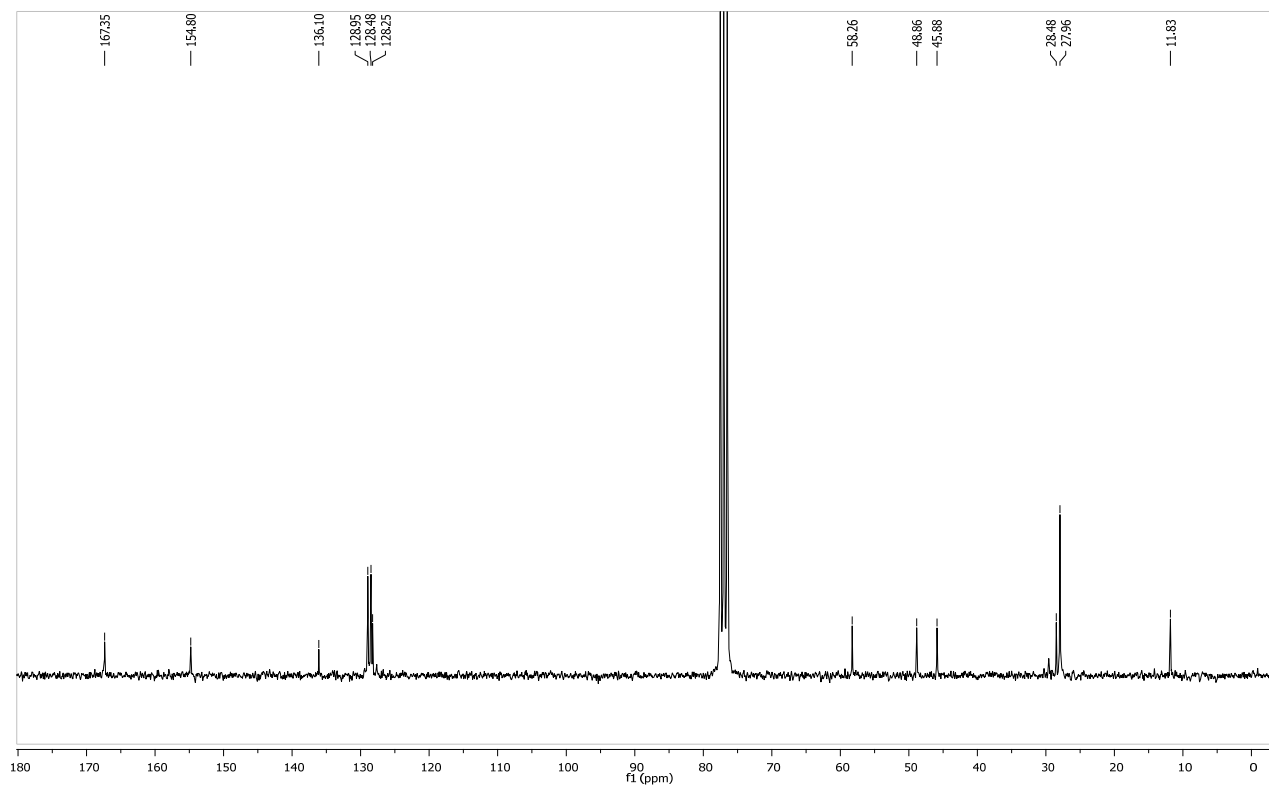

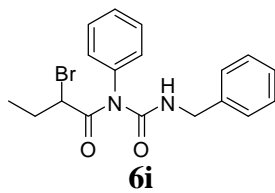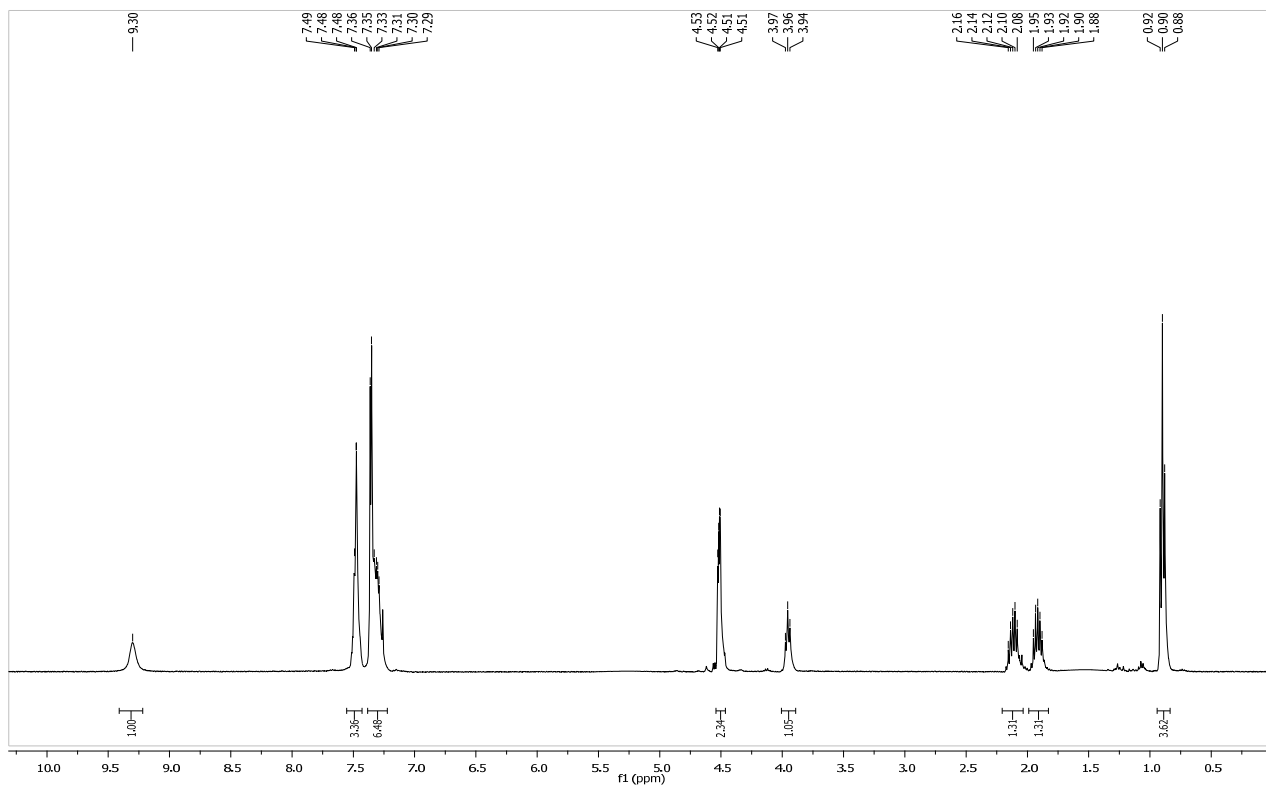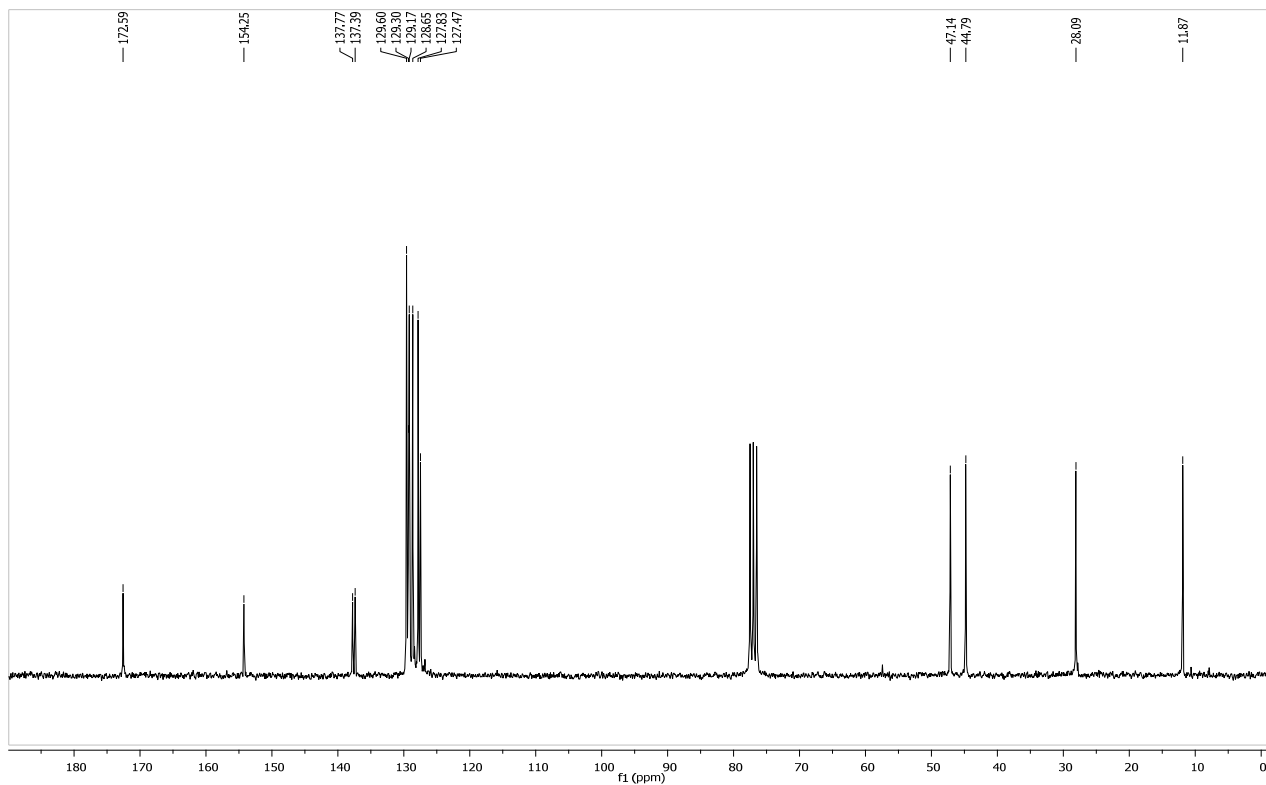

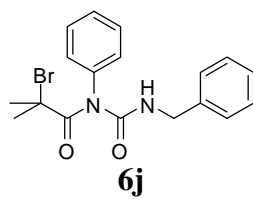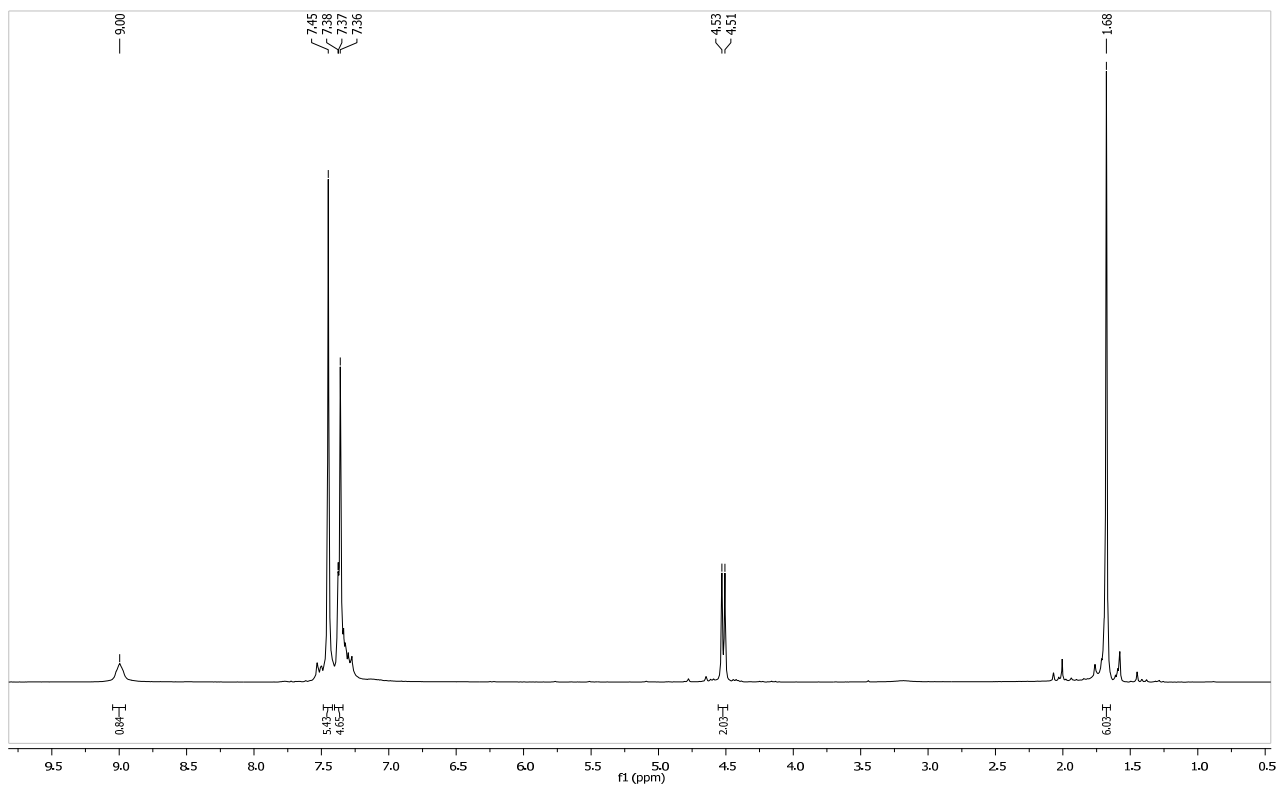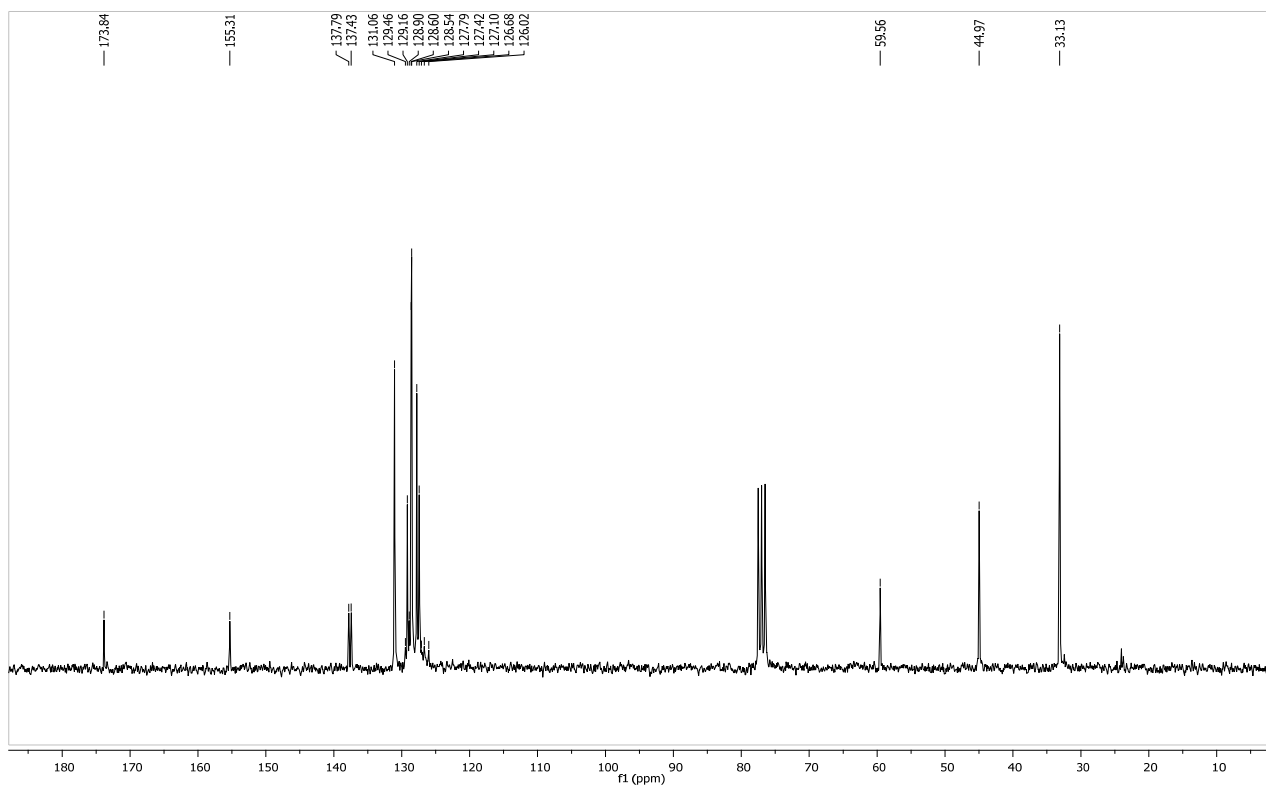

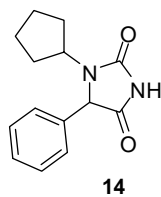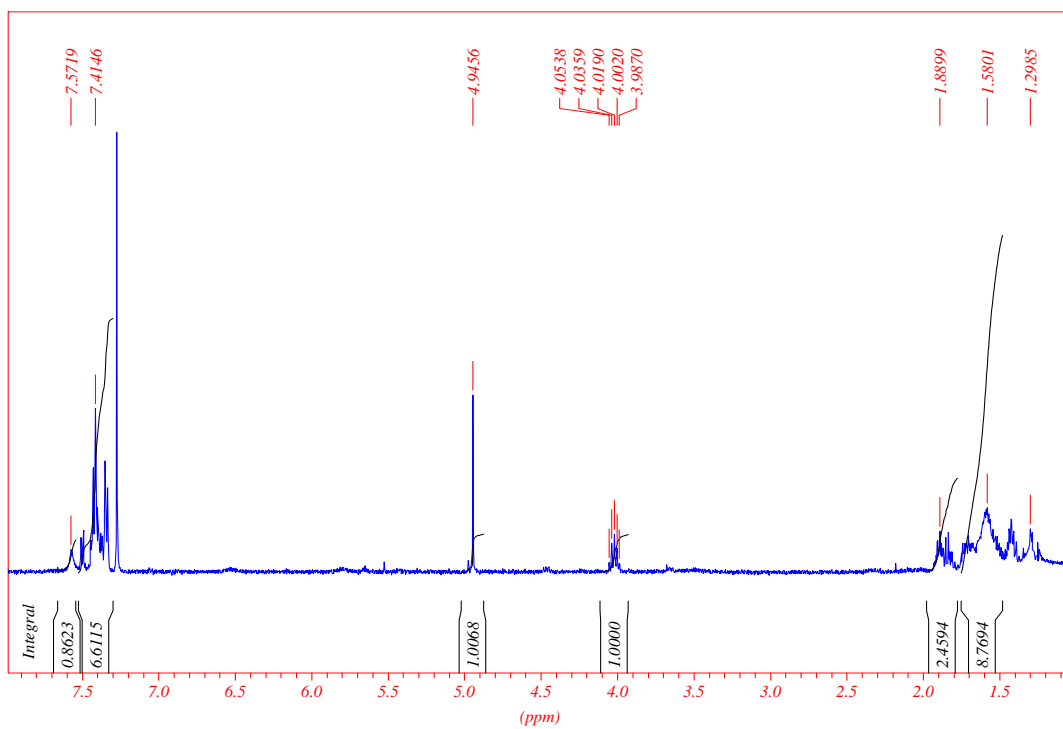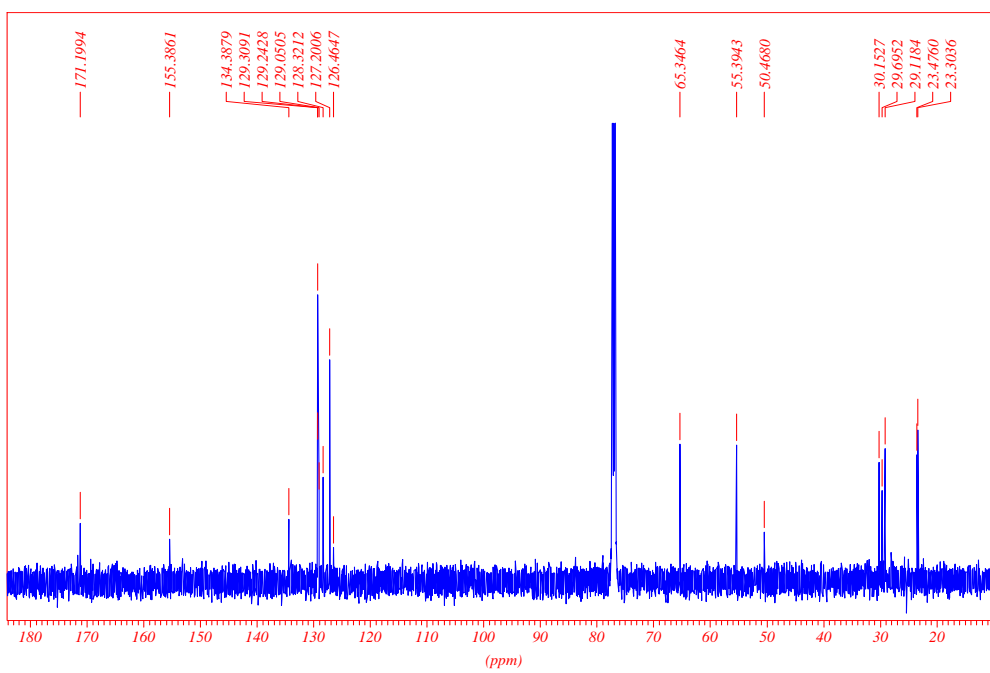

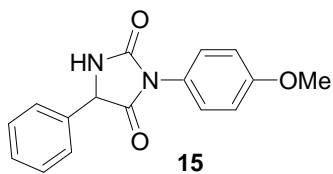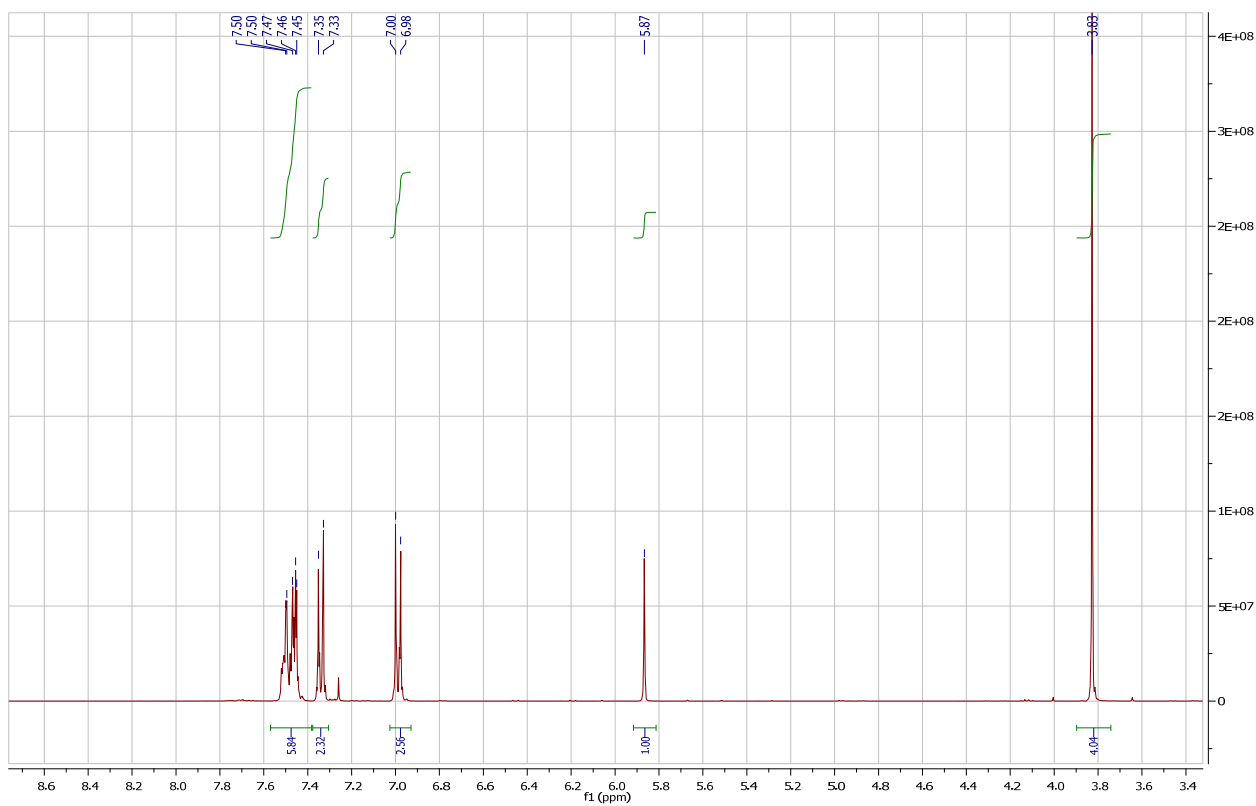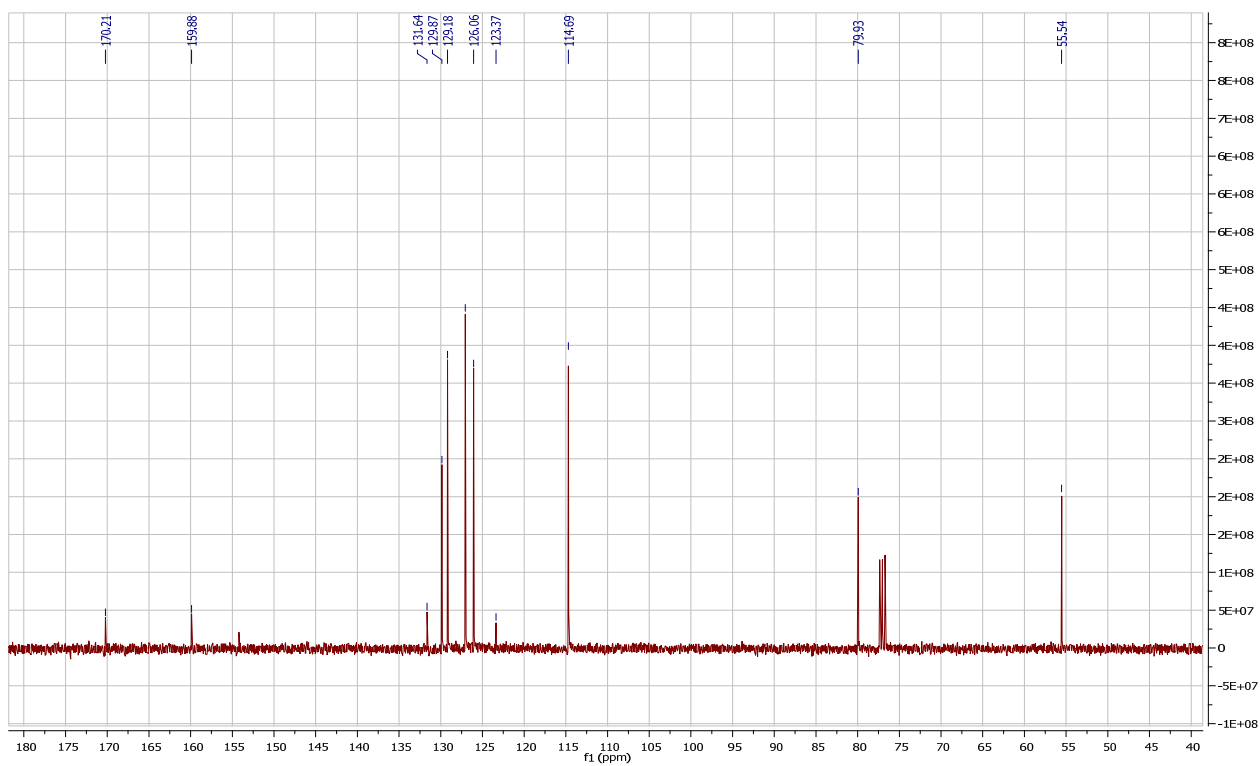

Supplement: c2ob26498f.pdf [file c2ob26498f.pdf]
